# Supplementary material for: A breast tissue-specific epigenetic clock provides accurate chronological age predictions and reveals de-correlation of age and DNA methylation in tumor-adjacent and tumor samples
Source: bioRxiv preprint, doi:10.1101/2025.02.21.639537, version 2 (2025-02-28)
Supplement: Supplementary Tables 1 to 10 [file 639537_file09.xlsx]

## Sheet: Index
Table	Description
Supplementary Table 1	Data sources details: GEO accession number, number of subjects of each type
Supplementary Table 2	Samples on training and validation sets: GEO accession, N, train/test
Supplementary Table 3	Correlations of linear and quadratic beta values across all cross-platform probes
Supplementary Table 4	RMSE, MAE and r values for each dataset in the LOOC assay
Supplementary Table 5	BTEC's parameters
Supplementary Table 6	Genes enriched in tumors compared by EAA group
Supplementary Table 7	Results of statistical comparison of beta values from Tumor Adjacent and Tumor samples against values from Healthy samples
Supplementary Table 8	Correlation between beta values and age in healthy, tumor adjacent and tumor samples
Supplementary Table 9	Genes mapped to BTEC probes
Supplementary Table 10	Gene expression correlation with age in samples from healthy subjects

## Sheet: Supplementary Table 1
Dataset	Condition	Molecular_type	N	Min Age	Max Age	Median Age
GSE69914	Tumor	N/A	305	28	90	61
GSE225845	Healthy donor	N/A	231	15	90	40
GSE141441	Tumor	TNBC	164	32	92	58
GSE225845	Tumor adjacent	N/A	140	30	91	56
GSE101961	Healthy donor	N/A	121	17	76	38
GSE72308	Tumor	HR+	115	30.19	91.43	57.72
GSE225845	Tumor	HR+	111	32	93	59
GSE88883	Healthy donor	N/A	100	18	82	37
GSE108213	Tumor adjacent	N/A	77	46	85	59
GSE67919	Tumor adjacent	N/A	70	23	84	55
GSE78754	Tumor	TNBC	68	29.09	83	55.02
GSE72308	Tumor	TNBC	65	23.38	82.12	55.99
GSE72308	Tumor	HER2+	55	28.64	82.83	55.22
GSE225845	Tumor	TNBC	51	32	74	55
GSE69914	Healthy donor	N/A	49	18	80	51
GSE69914	Tumor adjacent	N/A	42	30	86	51
GSE66313	Tumor	N/A	40	37	78	59
GSE225845	Tumor	N/A	35	33	90	59
GSE37754	Tumor	HR+	29	34	91	57
GSE225845	Tumor	HER2+	27	30	82	54
GSE67919	Healthy donor	N/A	26	19	76	45.5
GSE74214	Healthy donor	N/A	18	13	80	54.5
GSE37754	Tumor	N/A	17	37	75	53
GSE66313	Tumor adjacent	N/A	15	37	78	50
GSE37754	Tumor	TNBC	14	30	63	40.5
GSE37754	Tumor adjacent	N/A	10	30	93	44.5
GSE133985	Tumor	N/A	8	32	66.8	48.4
GSE108213	Healthy donor	N/A	8	42	68	59.5
GSE133985	Tumor adjacent	N/A	8	32	66.8	49.5
GSE72308	Tumor	N/A	2	47.72	58.56	53.14
GSE141441	Tumor	HR+	1	70	70	70
GSE141441	Tumor	N/A	1	54	54	54

## Sheet: Supplementary Table 2
Dataset	N	Training/Validation
GSE225845	231	Training
GSE88883	100	Training
GSE69914	49	Training
GSE74214	18	Training
GSE108213	8	Training
GSE101961	121	Validation
GSE67919	26	Validation

## Sheet: Supplementary Table 3
	pval	r	p_corrected	degree	abs_r	Above p_corrected threshold	Top 0.5%
cg24251496	0.000115888	-0.190142	0.000524074	linear	0.190142	True	False
cg08679134	0.0890131	0.0845102	0.136436	linear	0.0845102	False	False
cg07329397	0.00304131	-0.146733	0.00776262	linear	0.146733	True	False
cg20540306	8.04713e-05	0.194417	0.000389677	linear	0.194417	True	False
cg21415305	0.0649193	-0.0916958	0.104253	linear	0.0916958	False	False
cg00937330	0.0160573	0.119428	0.0316596	linear	0.119428	True	False
cg01967642	5.42946e-10	0.301729	1.94556e-08	linear	0.301729	True	False
cg27021553	0.328498	0.048616	0.410615	linear	0.048616	False	False
cg00162859	5.44499e-16	0.387436	2.18728e-13	linear	0.387436	True	True
cg23591125	0.0321731	-0.106344	0.0572102	linear	0.106344	False	False
cg06658404	0.00327253	-0.145625	0.00825452	linear	0.145625	True	False
cg25471478	0.00269533	-0.148544	0.00701418	linear	0.148544	True	False
cg05517527	1.67864e-06	0.235046	1.61712e-05	linear	0.235046	True	False
cg13600493	1.66752e-07	0.256155	2.3617e-06	linear	0.256155	True	False
cg05921889	0.115976	0.0781332	0.170852	linear	0.0781332	False	False
cg05880105	0.197298	-0.0641181	0.268011	linear	0.0641181	False	False
cg20505728	2.02168e-06	0.233259	1.88963e-05	linear	0.233259	True	False
cg12342027	0.629535	0.0240108	0.6984	linear	0.0240108	False	False
cg13906377	0.277173	0.0540589	0.356457	linear	0.0540589	False	False
cg06113665	5.05361e-05	0.199739	0.000265953	linear	0.199739	True	False
cg13464717	0.0226235	-0.113127	0.0424005	linear	0.113127	True	False
cg07954054	1.10778e-06	-0.238991	1.14421e-05	linear	0.238991	True	False
cg05104081	0.00887135	0.129729	0.0191623	linear	0.129729	True	False
cg10070104	3.08705e-05	0.20523	0.000177927	linear	0.20523	True	False
cg25440932	0.169497	-0.0683125	0.235874	linear	0.0683125	False	False
cg24977541	2.99861e-10	0.306019	1.18428e-08	linear	0.306019	True	False
cg12071806	0.0127464	-0.123522	0.0260382	linear	0.123522	True	False
cg06719448	0.418298	0.0402766	0.501089	linear	0.0402766	False	False
cg07706279	0.266443	-0.0552807	0.344952	linear	0.0552807	False	False
cg01943657	0.982161	0.00111313	0.986882	linear	0.00111313	False	False
cg21583086	7.86017e-05	0.194689	0.000382243	linear	0.194689	True	False
cg27380904	4.64821e-14	0.362581	8.26992e-12	linear	0.362581	True	False
cg18670258	0.851699	-0.00930673	0.88593	linear	0.00930673	False	False
cg03442425	0.229173	-0.0598096	0.30398	linear	0.0598096	False	False
cg01084500	0.00340205	-0.145035	0.00853146	linear	0.145035	True	False
cg23380751	0.125899	0.0760806	0.18323	linear	0.0760806	False	False
cg04939662	0.238917	0.0585785	0.31477	linear	0.0585785	False	False
cg19242984	0.198351	0.0639681	0.269203	linear	0.0639681	False	False
cg10304824	0.0226516	0.113103	0.0424453	linear	0.113103	True	False
cg21067750	0.000253261	0.180651	0.000991252	linear	0.180651	True	False
cg06588782	8.78533e-09	0.280608	2.00026e-07	linear	0.280608	True	False
cg01639712	0.00325649	0.145699	0.00822152	linear	0.145699	True	False
cg00788815	0.0185318	0.116827	0.0357775	linear	0.116827	True	False
cg00083596	1.80692e-05	0.211035	0.000114812	linear	0.211035	True	False
cg16996544	0.0553576	-0.0951699	0.0909926	linear	0.0951699	False	False
cg23070073	0.0745301	0.088605	0.117257	linear	0.088605	False	False
cg03515098	1.91344e-05	0.210422	0.00012032	linear	0.210422	True	False
cg10563131	0.000230356	0.181827	0.000917448	linear	0.181827	True	False
cg06585233	0.0298295	-0.10783	0.0536335	linear	0.10783	False	False
cg11965671	0.697393	-0.0193558	0.757586	linear	0.0193558	False	False
cg13619988	0.000268232	-0.179935	0.0010392	linear	0.179935	True	False
cg16472998	0.154441	-0.0708025	0.21798	linear	0.0708025	False	False
cg08755784	0.357623	-0.0457713	0.440624	linear	0.0457713	False	False
cg26010110	0.22998	-0.0597063	0.304874	linear	0.0597063	False	False
cg00964963	0.00179257	0.154517	0.00498778	linear	0.154517	True	False
cg14847688	0.535762	0.0308198	0.613608	linear	0.0308198	False	False
cg13276704	0.00763349	0.13223	0.0168783	linear	0.13223	True	False
cg05978010	0.0117981	-0.124868	0.0243881	linear	0.124868	True	False
cg23832388	0.0334567	0.10557	0.0591667	linear	0.10557	False	False
cg23062357	0.194198	0.0645634	0.26449	linear	0.0645634	False	False
cg09512891	0.148444	0.0718454	0.2108	linear	0.0718454	False	False
cg01806427	0.0232476	0.112614	0.0433944	linear	0.112614	True	False
cg05817232	0.0200919	-0.11534	0.0383256	linear	0.11534	True	False
cg24400921	0.516553	0.032284	0.595625	linear	0.032284	False	False
cg18583931	0.236654	0.0588613	0.312252	linear	0.0588613	False	False
cg13670756	0.0757457	0.0882376	0.118891	linear	0.0882376	False	False
cg18835048	0.000604302	-0.169501	0.00202531	linear	0.169501	True	False
cg18679635	0.309627	0.0505471	0.390935	linear	0.0505471	False	False
cg02370222	0.214732	-0.0617044	0.287718	linear	0.0617044	False	False
cg21831836	0.00149395	0.15712	0.00428665	linear	0.15712	True	False
cg23391368	0.278527	0.053907	0.357914	linear	0.053907	False	False
cg00439261	9.26988e-11	0.314303	4.44604e-09	linear	0.314303	True	False
cg00970558	0.0604175	0.0932747	0.0980572	linear	0.0932747	False	False
cg19478779	0.716997	0.0180435	0.774396	linear	0.0180435	False	False
cg21460729	5.76377e-11	0.317584	2.98491e-09	linear	0.317584	True	False
cg04803921	0.000774703	-0.166188	0.00248666	linear	0.166188	True	False
cg24045566	0.00197418	-0.153123	0.00540835	linear	0.153123	True	False
cg08401703	0.000222353	0.182264	0.000891636	linear	0.182264	True	False
cg21372571	0.821648	-0.0112219	0.861552	linear	0.0112219	False	False
cg10882692	7.23958e-06	0.220594	5.40869e-05	linear	0.220594	True	False
cg01517364	0.00774743	0.131985	0.0170932	linear	0.131985	True	False
cg02760112	0.00200117	-0.152926	0.00546868	linear	0.152926	True	False
cg18998938	0.717977	0.0179782	0.775232	linear	0.0179782	False	False
cg17878139	0.00236833	0.150461	0.00629425	linear	0.150461	True	False
cg24033067	0.484339	-0.0348045	0.565147	linear	0.0348045	False	False
cg19765450	0.0287858	0.108524	0.0520362	linear	0.108524	False	False
cg25510591	0.225042	0.0603428	0.299377	linear	0.0603428	False	False
cg06448332	1.39127e-12	0.342014	1.33894e-10	linear	0.342014	True	False
cg01604628	2.10653e-11	0.324405	1.28793e-09	linear	0.324405	True	False
cg09761224	0.313115	-0.0501845	0.394549	linear	0.0501845	False	False
cg05152874	0.0425928	-0.100687	0.0727001	linear	0.100687	False	False
cg23541926	6.9041e-05	0.196185	0.000343574	linear	0.196185	True	False
cg07645736	0.187623	-0.0655253	0.256887	linear	0.0655253	False	False
cg04880940	0.00198783	0.153023	0.00543907	linear	0.153023	True	False
cg23611643	4.2573e-09	0.286275	1.08768e-07	linear	0.286275	True	False
cg20666069	0.0567455	-0.0946362	0.092957	linear	0.0946362	False	False
cg17167536	4.61643e-07	0.247083	5.51715e-06	linear	0.247083	True	False
cg14887955	0.240898	0.0583326	0.316983	linear	0.0583326	False	False
cg20909773	0.867997	0.00827391	0.898879	linear	0.00827391	False	False
cg01975672	0.040668	-0.101636	0.069897	linear	0.101636	False	False
cg10935550	0.0207662	-0.114728	0.0394182	linear	0.114728	True	False
cg25264370	0.0958952	-0.0827503	0.14538	linear	0.0827503	False	False
cg08670383	1.8017e-07	0.255478	2.52079e-06	linear	0.255478	True	False
cg13778222	1.36674e-07	0.257887	1.99779e-06	linear	0.257887	True	False
cg10341482	2.2568e-05	0.208645	0.000137762	linear	0.208645	True	False
cg00605063	0.0411054	-0.101417	0.0705317	linear	0.101417	False	False
cg08543952	0.0224898	-0.113238	0.0421855	linear	0.113238	True	False
cg01538969	2.87881e-05	0.205996	0.000168064	linear	0.205996	True	False
cg01994779	0.0804261	0.0868664	0.12512	linear	0.0868664	False	False
cg06201264	0.635791	0.0235734	0.703905	linear	0.0235734	False	False
cg11149073	0.0182795	-0.117078	0.0353618	linear	0.117078	True	False
cg04869379	0.00171489	0.155153	0.00480629	linear	0.155153	True	False
cg11669606	0.295385	0.0520563	0.375859	linear	0.0520563	False	False
cg00843019	1.44342e-05	0.213422	9.5421e-05	linear	0.213422	True	False
cg08566437	0.0456084	-0.0992696	0.0770834	linear	0.0992696	False	False
cg08132525	4.37563e-07	0.247569	5.27784e-06	linear	0.247569	True	False
cg13877109	0.0729706	0.0890835	0.115163	linear	0.0890835	False	False
cg04769798	0.113131	0.0787469	0.167313	linear	0.0787469	False	False
cg21544402	0.000201197	0.183494	0.000822417	linear	0.183494	True	False
cg01204683	0.00664085	0.134512	0.0150035	linear	0.134512	True	False
cg21673812	0.0171024	0.11829	0.0334136	linear	0.11829	True	False
cg07951301	0.15411	-0.0708591	0.217569	linear	0.0708591	False	False
cg23683588	0.252194	-0.0569566	0.329381	linear	0.0569566	False	False
cg20786418	0.415993	-0.0404762	0.498877	linear	0.0404762	False	False
cg16929496	0.308612	-0.0506531	0.38987	linear	0.0506531	False	False
cg11855117	0.00198862	0.153017	0.00544077	linear	0.153017	True	False
cg14772599	0.30652	0.0508724	0.387641	linear	0.0508724	False	False
cg11799819	0.0556649	-0.0950508	0.0914294	linear	0.0950508	False	False
cg19063654	0.0147271	0.120975	0.0294211	linear	0.120975	True	False
cg22408735	0.0122969	-0.124149	0.0252635	linear	0.124149	True	False
cg14381040	5.18863e-06	0.223972	4.11127e-05	linear	0.223972	True	False
cg03448754	0.185148	-0.0658937	0.254053	linear	0.0658937	False	False
cg23030397	0.172207	-0.0678822	0.239045	linear	0.0678822	False	False
cg01873236	0.00388553	-0.142998	0.00954594	linear	0.142998	True	False
cg13489040	0.0968531	0.0825134	0.14662	linear	0.0825134	False	False
cg14979231	0.0205422	0.114929	0.0390525	linear	0.114929	True	False
cg10718991	0.760122	-0.0151988	0.810866	linear	0.0151988	False	False
cg10009157	0.104118	-0.080775	0.155888	linear	0.080775	False	False
cg03762366	0.0903338	-0.0841642	0.138164	linear	0.0841642	False	False
cg04731544	0.863395	-0.00856516	0.895192	linear	0.00856516	False	False
cg15125763	0.608415	0.0255013	0.679666	linear	0.0255013	False	False
cg24028495	0.00495433	0.139207	0.0117112	linear	0.139207	True	False
cg24621354	0.000378266	0.175591	0.00137846	linear	0.175591	True	False
cg02018802	0.933187	0.00417353	0.949366	linear	0.00417353	False	False
cg21841501	0.000274092	0.179665	0.00105771	linear	0.179665	True	False
cg14651453	0.0046427	-0.140229	0.0110937	linear	0.140229	True	False
cg03220670	0.0336254	0.10547	0.0594218	linear	0.10547	False	False
cg13172367	0.00528116	0.138195	0.0123616	linear	0.138195	True	False
cg00811777	0.0582047	0.0940867	0.0949852	linear	0.0940867	False	False
cg02393428	0.714113	0.0182357	0.771997	linear	0.0182357	False	False
cg04981940	0.00710426	0.133411	0.0158822	linear	0.133411	True	False
cg07394955	0.632329	0.0238152	0.70086	linear	0.0238152	False	False
cg26506842	6.89908e-05	0.196193	0.000343371	linear	0.196193	True	False
cg13165753	0.0466073	0.0988175	0.0785112	linear	0.0988175	False	False
cg02964389	0.952553	0.00296209	0.96434	linear	0.00296209	False	False
cg23891298	0.0846281	-0.0856893	0.130663	linear	0.0856893	False	False
cg13786429	7.06631e-05	0.195918	0.000350102	linear	0.195918	True	False
cg12565636	0.0224153	0.1133	0.0420664	linear	0.1133	True	False
cg26321464	0.955675	0.00276698	0.966796	linear	0.00276698	False	False
cg07363416	0.69413	-0.0195755	0.754863	linear	0.0195755	False	False
cg13742374	6.74871e-10	0.30014	2.33615e-08	linear	0.30014	True	False
cg04498190	3.34039e-06	-0.22836	2.86032e-05	linear	0.22836	True	False
cg18064171	0.0356765	0.104288	0.062498	linear	0.104288	False	False
cg26673722	5.85156e-08	0.265138	9.81974e-07	linear	0.265138	True	False
cg20445034	3.84566e-07	0.248736	4.7442e-06	linear	0.248736	True	False
cg09245952	0.485261	0.0347312	0.566024	linear	0.0347312	False	False
cg25501817	4.84631e-06	0.224658	3.88669e-05	linear	0.224658	True	False
cg06132876	0.147735	0.0719709	0.209935	linear	0.0719709	False	False
cg00469341	0.139275	-0.0735038	0.199636	linear	0.0735038	False	False
cg06408864	0.191099	-0.0650138	0.26091	linear	0.0650138	False	False
cg18075720	0.0480682	0.0981708	0.0806094	linear	0.0981708	False	False
cg20353207	0.535661	-0.0308275	0.613514	linear	0.0308275	False	False
cg23656110	0.306424	-0.0508824	0.387542	linear	0.0508824	False	False
cg19624681	0.117553	0.077798	0.172822	linear	0.077798	False	False
cg11673092	0.220785	-0.0608994	0.294595	linear	0.0608994	False	False
cg07030950	2.03244e-07	0.254419	2.7876e-06	linear	0.254419	True	False
cg20379125	0.00188199	-0.153815	0.00519506	linear	0.153815	True	False
cg26382251	0.0216698	0.113934	0.0408625	linear	0.113934	True	False
cg21952313	0.68847	0.0199575	0.750053	linear	0.0199575	False	False
cg26490054	0.0905084	0.0841188	0.138385	linear	0.0841188	False	False
cg12368342	0.010109	-0.127522	0.0213907	linear	0.127522	True	False
cg25683535	0.748883	0.015935	0.801322	linear	0.015935	False	False
cg01281231	0.63319	-0.023755	0.701621	linear	0.023755	False	False
cg11466321	0.00136258	0.158419	0.00396987	linear	0.158419	True	False
cg08371140	0.0149313	0.12073	0.0297659	linear	0.12073	True	False
cg14031365	0.00593793	0.136322	0.0136426	linear	0.136322	True	False
cg25384043	0.00796158	0.131534	0.0174916	linear	0.131534	True	False
cg15484384	5.99609e-10	0.301005	2.11778e-08	linear	0.301005	True	False
cg18232347	0.838853	0.0101236	0.875549	linear	0.0101236	False	False
cg16028986	0.000932759	-0.163671	0.00289782	linear	0.163671	True	False
cg14418690	3.89077e-06	-0.22685	3.24426e-05	linear	0.22685	True	False
cg26110727	0.0964982	0.0826009	0.14616	linear	0.0826009	False	False
cg18705541	0.00256694	0.14927	0.00673268	linear	0.14927	True	False
cg01177849	1.11814e-05	0.216104	7.73286e-05	linear	0.216104	True	False
cg21235925	0.0265141	0.110112	0.0485136	linear	0.110112	True	False
cg13219446	0.3296	-0.0485056	0.41175	linear	0.0485056	False	False
cg13906542	0.000139946	0.187894	0.000611197	linear	0.187894	True	False
cg12024969	0.0471579	0.0985718	0.0792996	linear	0.0985718	False	False
cg16767506	0.0678802	-0.0907058	0.108288	linear	0.0907058	False	False
cg05951763	1.6121e-08	0.27576	3.32782e-07	linear	0.27576	True	False
cg17972708	4.08807e-05	-0.202119	0.000223799	linear	0.202119	True	False
cg23268417	0.369076	0.0446928	0.452321	linear	0.0446928	False	False
cg22489740	8.73424e-05	-0.193464	0.000416637	linear	0.193464	True	False
cg14906103	0.000624528	0.169066	0.00208049	linear	0.169066	True	False
cg01075005	0.599029	-0.0261711	0.671225	linear	0.0261711	False	False
cg27352066	0.00501238	-0.139023	0.0118262	linear	0.139023	True	False
cg13071869	0.000128094	0.188952	0.000568511	linear	0.188952	True	False
cg24707416	0.0360451	-0.104082	0.0630491	linear	0.104082	False	False
cg00480848	1.08968e-06	0.239146	1.12858e-05	linear	0.239146	True	False
cg10651007	0.257654	-0.056307	0.335406	linear	0.056307	False	False
cg19944656	0.00144799	-0.157562	0.00417616	linear	0.157562	True	False
cg22693863	6.21299e-05	0.197393	0.000314896	linear	0.197393	True	False
cg03885639	0.0076634	0.132165	0.0169352	linear	0.132165	True	False
cg20169766	1.68536e-07	0.256062	2.38347e-06	linear	0.256062	True	False
cg00098799	0.0077105	-0.132064	0.0170236	linear	0.132064	True	False
cg21453451	0.0862646	0.0852437	0.132804	linear	0.0852437	False	False
cg21850826	0.000589679	0.169825	0.00198469	linear	0.169825	True	False
cg22630628	0.000180548	0.184817	0.00075248	linear	0.184817	True	False
cg10021756	3.11274e-07	0.250636	3.98058e-06	linear	0.250636	True	False
cg18762795	0.00072223	0.16713	0.00234604	linear	0.16713	True	False
cg04061506	0.0948952	-0.0829996	0.1441	linear	0.0829996	False	False
cg00979348	0.00298022	-0.147039	0.00763114	linear	0.147039	True	False
cg16030011	0.0125855	0.123744	0.025761	linear	0.123744	True	False
cg02305242	0.0218599	-0.113771	0.0411746	linear	0.113771	True	False
cg13308080	0.630225	-0.0239624	0.699005	linear	0.0239624	False	False
cg03193454	0.797541	-0.0127703	0.841925	linear	0.0127703	False	False
cg23392390	1.04993e-05	0.21676	7.34212e-05	linear	0.21676	True	False
cg05993643	0.171634	-0.0679727	0.238387	linear	0.0679727	False	False
cg17320282	6.32149e-06	0.221975	4.83624e-05	linear	0.221975	True	False
cg13421439	0.0946392	0.0830638	0.143775	linear	0.0830638	False	False
cg17823943	3.54798e-05	0.203694	0.000199269	linear	0.203694	True	False
cg24235997	5.19704e-07	-0.246004	6.09235e-06	linear	0.246004	True	False
cg01307526	0.00118797	0.160338	0.00354309	linear	0.160338	True	False
cg17289222	0.0359155	0.104154	0.0628557	linear	0.104154	False	False
cg24754337	0.950029	-0.00311988	0.962348	linear	0.00311988	False	False
cg13860447	0.00908182	0.129335	0.0195421	linear	0.129335	True	False
cg11380624	0.51789	0.0321812	0.596848	linear	0.0321812	False	False
cg14258341	0.152333	0.0711655	0.215418	linear	0.0711655	False	False
cg23719209	1.57527e-08	0.275946	3.2641e-07	linear	0.275946	True	False
cg16251130	0.561087	-0.028929	0.636866	linear	0.028929	False	False
cg09331127	0.243586	-0.0580012	0.319971	linear	0.0580012	False	False
cg22079057	2.96207e-14	0.3652	5.83787e-12	linear	0.3652	True	False
cg23541422	3.00964e-05	0.205508	0.000174312	linear	0.205508	True	False
cg18200326	0.0867847	-0.0851035	0.133493	linear	0.0851035	False	False
cg26921458	9.18598e-05	0.192876	0.000433686	linear	0.192876	True	False
cg01068412	0.371458	0.044471	0.454695	linear	0.044471	False	False
cg00434119	0.000166502	0.185801	0.00070439	linear	0.185801	True	False
cg07615087	0.906353	0.0058564	0.928939	linear	0.0058564	False	False
cg00354641	0.59043	-0.0267889	0.663378	linear	0.0267889	False	False
cg06496222	0.247781	0.0574891	0.324557	linear	0.0574891	False	False
cg17421097	0.317387	-0.049744	0.399044	linear	0.049744	False	False
cg18180874	0.27588	0.0542043	0.355079	linear	0.0542043	False	False
cg14283784	0.195685	0.0643492	0.266192	linear	0.0643492	False	False
cg20070933	7.0703e-12	0.331615	5.17834e-10	linear	0.331615	True	False
cg25063707	0.00221861	0.151421	0.00596109	linear	0.151421	True	False
cg11718677	0.000624151	-0.169074	0.00207942	linear	0.169074	True	False
cg14158053	0.313757	-0.050118	0.395216	linear	0.050118	False	False
cg11132921	1.92831e-05	0.210339	0.000121089	linear	0.210339	True	False
cg25588389	0.254174	0.0567199	0.331591	linear	0.0567199	False	False
cg14062101	0.000261847	0.180236	0.0010189	linear	0.180236	True	False
cg04781741	0.016862	0.118546	0.033009	linear	0.118546	True	False
cg26306636	0.67562	0.0208291	0.73895	linear	0.0208291	False	False
cg08525001	0.0278304	-0.109178	0.0505638	linear	0.109178	False	False
cg04252762	9.42008e-05	0.192582	0.000442551	linear	0.192582	True	False
cg22894076	0.73043	0.0171515	0.785734	linear	0.0171515	False	False
cg12764921	0.0108556	-0.126304	0.0227188	linear	0.126304	True	False
cg05337454	0.0536363	0.0958474	0.0885757	linear	0.0958474	False	False
cg15912086	0.0526826	0.0962306	0.0872213	linear	0.0962306	False	False
cg23841763	0.0044506	0.140891	0.0107054	linear	0.140891	True	False
cg08050967	6.87712e-07	0.243433	7.70229e-06	linear	0.243433	True	False
cg04383274	0.0497891	-0.0974297	0.083089	linear	0.0974297	False	False
cg22522920	0.0117266	0.124973	0.0242635	linear	0.124973	True	False
cg25075684	0.149298	0.0716949	0.211822	linear	0.0716949	False	False
cg25521853	1.3915e-07	0.257732	2.02825e-06	linear	0.257732	True	False
cg26269882	0.00575807	-0.136815	0.0132918	linear	0.136815	True	False
cg24416562	0.00204158	-0.152635	0.00556139	linear	0.152635	True	False
cg08835164	0.037117	-0.103492	0.0646458	linear	0.103492	False	False
cg16075384	6.02865e-07	-0.244645	6.9001e-06	linear	0.244645	True	False
cg16814416	0.56323	-0.0287709	0.638822	linear	0.0287709	False	False
cg03266453	0.682094	-0.0203892	0.744566	linear	0.0203892	False	False
cg16190331	3.50425e-09	0.287776	9.24412e-08	linear	0.287776	True	False
cg07363239	0.055648	-0.0950573	0.0914065	linear	0.0950573	False	False
cg18528549	0.00251393	0.149579	0.00661503	linear	0.149579	True	False
cg07997333	0.000487613	0.172315	0.00169828	linear	0.172315	True	False
cg14347670	0.000390634	-0.175179	0.0014154	linear	0.175179	True	False
cg06139438	0.000542631	0.170919	0.00185274	linear	0.170919	True	False
cg25526215	0.109051	-0.0796486	0.162171	linear	0.0796486	False	False
cg19071225	0.0159335	-0.119567	0.0314534	linear	0.119567	True	False
cg26105956	0.183249	-0.066179	0.251837	linear	0.066179	False	False
cg05726556	0.00631446	0.13533	0.0143763	linear	0.13533	True	False
cg24664861	0.00033168	-0.177263	0.00123755	linear	0.177263	True	False
cg23528652	0.584611	-0.0272092	0.658133	linear	0.0272092	False	False
cg17628660	0.153271	0.0710035	0.216569	linear	0.0710035	False	False
cg23723793	0.0024539	0.149937	0.00648442	linear	0.149937	True	False
cg10362172	0.229009	-0.0598307	0.30379	linear	0.0598307	False	False
cg03890628	9.86249e-07	0.240082	1.03956e-05	linear	0.240082	True	False
cg22173019	9.06609e-10	0.297967	2.98592e-08	linear	0.297967	True	False
cg24834709	0.661712	-0.0217798	0.726732	linear	0.0217798	False	False
cg10943191	0.569376	0.0283192	0.644426	linear	0.0283192	False	False
cg05304366	0.11832	0.0776364	0.173785	linear	0.0776364	False	False
cg17369991	0.6115	0.0252822	0.682472	linear	0.0252822	False	False
cg19217778	0.0283232	0.108838	0.0513197	linear	0.108838	False	False
cg26069514	1.12263e-07	-0.259589	1.69486e-06	linear	0.259589	True	False
cg14699869	1.86022e-12	0.340184	1.7121e-10	linear	0.340184	True	False
cg11326510	0.00133277	0.15873	0.00389827	linear	0.15873	True	False
cg02992645	9.02528e-08	0.261462	1.41292e-06	linear	0.261462	True	False
cg07747690	0.484901	0.0347598	0.565684	linear	0.0347598	False	False
cg03295542	0.000115477	0.190184	0.000522495	linear	0.190184	True	False
cg23624725	0.187935	-0.065479	0.257267	linear	0.065479	False	False
cg04488153	0.28747	0.0529162	0.367486	linear	0.0529162	False	False
cg26651950	4.21045e-06	0.226064	3.46017e-05	linear	0.226064	True	False
cg15914239	1.83335e-05	0.210879	0.00011617	linear	0.210879	True	False
cg17174613	4.74765e-08	0.266892	8.25194e-07	linear	0.266892	True	False
cg09146459	0.0315172	-0.106751	0.0562174	linear	0.106751	False	False
cg22050157	0.00927655	0.128978	0.0198968	linear	0.128978	True	False
cg21130588	0.00383867	0.143185	0.00944892	linear	0.143185	True	False
cg18226915	1.37822e-06	0.236926	1.37084e-05	linear	0.236926	True	False
cg00612107	0.00051719	-0.171547	0.00178186	linear	0.171547	True	False
cg01339929	0.0149442	-0.120714	0.029787	linear	0.120714	True	False
cg24983628	1.99724e-08	0.274026	3.97803e-07	linear	0.274026	True	False
cg17541965	0.114682	-0.0784108	0.169255	linear	0.0784108	False	False
cg12027420	0.0561461	-0.0948653	0.0921083	linear	0.0948653	False	False
cg02341556	0.690901	-0.0197933	0.752118	linear	0.0197933	False	False
cg22399133	0.0328133	-0.105955	0.0581849	linear	0.105955	False	False
cg17974185	0.000291476	0.178894	0.00111255	linear	0.178894	True	False
cg03317618	0.0581792	-0.0940962	0.0949486	linear	0.0940962	False	False
cg19711602	0.000337006	0.177061	0.0012538	linear	0.177061	True	False
cg25017250	3.63562e-05	0.203424	0.000203325	linear	0.203424	True	False
cg01529538	0.221823	0.060763	0.295731	linear	0.060763	False	False
cg01089838	0.0872497	0.0849787	0.134115	linear	0.0849787	False	False
cg13957538	0.0299984	0.107719	0.0538891	linear	0.107719	False	False
cg13627416	0.125014	0.0762585	0.182123	linear	0.0762585	False	False
cg17976576	0.504121	-0.0332466	0.583938	linear	0.0332466	False	False
cg06733311	0.77638	0.0141396	0.824356	linear	0.0141396	False	False
cg02174486	4.57777e-08	0.267197	8.00483e-07	linear	0.267197	True	False
cg16763654	0.540671	-0.0304499	0.618139	linear	0.0304499	False	False
cg09312895	0.495015	0.0339596	0.575269	linear	0.0339596	False	False
cg04624564	0.324527	-0.0490163	0.406528	linear	0.0490163	False	False
cg13578652	0.29622	0.0519666	0.376729	linear	0.0519666	False	False
cg18066403	2.23278e-05	0.20876	0.000136553	linear	0.20876	True	False
cg24148767	7.92627e-05	0.194592	0.000384846	linear	0.194592	True	False
cg23239052	0.451402	0.0374771	0.5335	linear	0.0374771	False	False
cg00214044	0.000246423	0.180991	0.000969153	linear	0.180991	True	False
cg01982493	0.00512657	-0.138666	0.0120566	linear	0.138666	True	False
cg05272827	0.00963711	-0.128333	0.0205519	linear	0.128333	True	False
cg11698180	0.00010673	0.191115	0.00049012	linear	0.191115	True	False
cg24721630	0.906579	0.00584219	0.929124	linear	0.00584219	False	False
cg21415969	0.0461732	-0.099013	0.0778973	linear	0.099013	False	False
cg01420491	0.721563	-0.0177397	0.778225	linear	0.0177397	False	False
cg26036479	0.220893	0.0608852	0.294717	linear	0.0608852	False	False
cg24327877	0.8028	-0.0124315	0.846195	linear	0.0124315	False	False
cg18932078	1.63989e-07	0.256301	2.32778e-06	linear	0.256301	True	False
cg19272547	0.988437	-0.000721486	0.991529	linear	0.000721486	False	False
cg18975948	0.00050763	0.171791	0.00175461	linear	0.171791	True	False
cg26926521	0.00115081	-0.160779	0.00345057	linear	0.160779	True	False
cg14969806	0.0039808	-0.142625	0.00974339	linear	0.142625	True	False
cg11081723	0.635412	0.0235998	0.703573	linear	0.0235998	False	False
cg05030251	4.23368e-12	0.334938	3.38557e-10	linear	0.334938	True	False
cg21127184	0.0299718	0.107737	0.0538485	linear	0.107737	False	False
cg27339256	0.0378955	0.103073	0.0657999	linear	0.103073	False	False
cg13594630	2.4252e-07	0.252858	3.22899e-06	linear	0.252858	True	False
cg19685709	9.32117e-10	0.297762	3.05648e-08	linear	0.297762	True	False
cg00787282	2.58562e-07	0.25229	3.40514e-06	linear	0.25229	True	False
cg21299211	6.57202e-07	0.243852	7.41811e-06	linear	0.243852	True	False
cg18980554	0.799836	0.0126224	0.843753	linear	0.0126224	False	False
cg02632800	1.86016e-14	0.367878	3.99078e-12	linear	0.367878	True	False
cg17241937	0.401127	0.0417798	0.484358	linear	0.0417798	False	False
cg23225476	0.00114016	0.160908	0.00342414	linear	0.160908	True	False
cg24348114	0.000550698	-0.170725	0.00187564	linear	0.170725	True	False
cg07714420	0.00750456	0.132511	0.0166363	linear	0.132511	True	False
cg03276956	0.0112892	-0.12563	0.0234942	linear	0.12563	True	False
cg13305609	0.138435	0.0736599	0.198609	linear	0.0736599	False	False
cg24121906	0.582937	0.0273305	0.656624	linear	0.0273305	False	False
cg03731358	0.00245767	0.149914	0.00649306	linear	0.149914	True	False
cg11952714	0.107516	-0.0799946	0.160218	linear	0.0799946	False	False
cg25317664	0.180516	0.0665933	0.248693	linear	0.0665933	False	False
cg02734755	0.221815	-0.0607641	0.295723	linear	0.0607641	False	False
cg04751628	0.181525	0.0664398	0.249866	linear	0.0664398	False	False
cg18091167	0.00171565	0.155147	0.00480773	linear	0.155147	True	False
cg24659858	0.665076	-0.0215492	0.729616	linear	0.0215492	False	False
cg27288725	0.295143	-0.0520824	0.375607	linear	0.0520824	False	False
cg08857729	0.00953192	-0.128519	0.0203618	linear	0.128519	True	False
cg04838847	5.16663e-06	0.224015	4.09662e-05	linear	0.224015	True	False
cg04653308	0.00116019	-0.160667	0.00347376	linear	0.160667	True	False
cg13439406	0.0288451	-0.108483	0.0521263	linear	0.108483	False	False
cg24772001	4.46192e-07	0.247392	5.36307e-06	linear	0.247392	True	False
cg22606129	9.56586e-05	-0.192402	0.000448139	linear	0.192402	True	False
cg04509221	0.00552583	0.137474	0.0128429	linear	0.137474	True	False
cg01684721	0.00306719	0.146605	0.00781812	linear	0.146605	True	False
cg15305070	0.207042	-0.0627509	0.279028	linear	0.0627509	False	False
cg23398173	0.859285	0.00882551	0.891965	linear	0.00882551	False	False
cg06794744	5.03394e-09	0.284975	1.25043e-07	linear	0.284975	True	False
cg18864497	0.303447	0.0511962	0.384405	linear	0.0511962	False	False
cg18117847	9.08612e-10	0.297951	2.99037e-08	linear	0.297951	True	False
cg17847607	0.0444347	-0.0998115	0.0753684	linear	0.0998115	False	False
cg12592321	0.158059	0.070188	0.222312	linear	0.070188	False	False
cg01554451	1.58628e-06	0.235587	1.54175e-05	linear	0.235587	True	False
cg17847749	0.00230851	-0.150837	0.00616107	linear	0.150837	True	False
cg21643314	0.953802	-0.00288404	0.965325	linear	0.00288404	False	False
cg19092322	0.00030622	0.178273	0.00115923	linear	0.178273	True	False
cg23341089	1.00934e-10	0.313711	4.77486e-09	linear	0.313711	True	False
cg27022615	0.00355489	-0.144364	0.00885538	linear	0.144364	True	False
cg15574301	0.312638	0.0502339	0.394054	linear	0.0502339	False	False
cg02315513	1.64558e-06	0.235237	1.5902e-05	linear	0.235237	True	False
cg26182866	0.000135564	-0.188275	0.00059529	linear	0.188275	True	False
cg13936452	0.0228672	-0.112925	0.0427878	linear	0.112925	True	False
cg00893603	0.0620449	0.0926931	0.100307	linear	0.0926931	False	False
cg10090985	0.0838019	-0.085917	0.129587	linear	0.085917	False	False
cg14368954	2.62259e-05	-0.207014	0.000155813	linear	0.207014	True	False
cg01943983	0.0493719	0.0976074	0.0824886	linear	0.0976074	False	False
cg27317218	0.202565	0.0633731	0.273953	linear	0.0633731	False	False
cg23197191	0.00210061	0.15222	0.00569695	linear	0.15222	True	False
cg17818196	0.00571353	-0.13694	0.0132038	linear	0.13694	True	False
cg24793124	0.388349	-0.0429235	0.471683	linear	0.0429235	False	False
cg10190497	0.140673	0.0732457	0.20133	linear	0.0732457	False	False
cg13536107	4.55712e-07	0.2472	5.45778e-06	linear	0.2472	True	False
cg05006903	0.969365	0.00191188	0.977199	linear	0.00191188	False	False
cg08344493	0.00249505	0.149691	0.00657351	linear	0.149691	True	False
cg01363433	2.55117e-06	0.231003	2.29001e-05	linear	0.231003	True	False
cg10705306	0.00332234	-0.145396	0.00836097	linear	0.145396	True	False
cg11576468	2.28627e-08	0.272926	4.46617e-07	linear	0.272926	True	False
cg10617784	0.0900436	-0.0842399	0.137781	linear	0.0842399	False	False
cg18043283	2.90964e-06	0.229717	2.55189e-05	linear	0.229717	True	False
cg09313258	0.0341588	0.105157	0.0602331	linear	0.105157	False	False
cg13481974	0.824741	-0.0110241	0.864055	linear	0.0110241	False	False
cg21918126	0.000756882	-0.166501	0.00243934	linear	0.166501	True	False
cg05021643	0.21945	-0.0610757	0.293068	linear	0.0610757	False	False
cg27425755	0.000484973	-0.172386	0.00169089	linear	0.172386	True	False
cg18437480	0.462897	0.0365325	0.544613	linear	0.0365325	False	False
cg01814565	0.0263476	0.110233	0.0482541	linear	0.110233	True	False
cg03446559	1.52514e-05	0.212839	9.98445e-05	linear	0.212839	True	False
cg17211192	0.445756	0.0379461	0.528017	linear	0.0379461	False	False
cg20072242	0.130294	-0.0752116	0.18863	linear	0.0752116	False	False
cg12200950	8.49641e-06	0.218951	6.16475e-05	linear	0.218951	True	False
cg17835961	0.172433	0.0678466	0.239307	linear	0.0678466	False	False
cg23899359	0.609452	-0.0254276	0.680604	linear	0.0254276	False	False
cg23460707	0.99349	0.000406164	0.995314	linear	0.000406164	False	False
cg01154095	0.0581	0.0941257	0.0948406	linear	0.0941257	False	False
cg18109665	0.0394184	0.102273	0.0680454	linear	0.102273	False	False
cg26384036	0.229866	-0.0597209	0.304749	linear	0.0597209	False	False
cg01981445	0.00030981	0.178126	0.0011705	linear	0.178126	True	False
cg04757168	0.000120481	0.189681	0.000540819	linear	0.189681	True	False
cg05609864	0.000165722	-0.185858	0.000701787	linear	0.185858	True	False
cg14974147	2.58609e-06	0.23087	2.31655e-05	linear	0.23087	True	False
cg06827850	1.40992e-06	0.23671	1.39675e-05	linear	0.23671	True	False
cg08758185	0.000597322	0.169655	0.00200613	linear	0.169655	True	False
cg18239763	0.000296787	-0.178667	0.00112926	linear	0.178667	True	False
cg07849384	0.525563	-0.0315938	0.604095	linear	0.0315938	False	False
cg19477361	2.95653e-08	0.27082	5.55002e-07	linear	0.27082	True	False
cg13560072	0.00146938	0.157354	0.00422849	linear	0.157354	True	False
cg00244267	0.0154502	0.120119	0.0306379	linear	0.120119	True	False
cg15342873	0.944358	-0.00347449	0.957926	linear	0.00347449	False	False
cg10101479	0.570705	-0.0282218	0.645621	linear	0.0282218	False	False
cg26198823	0.0230261	0.112795	0.0430435	linear	0.112795	True	False
cg03132166	0.000733633	-0.16692	0.00237698	linear	0.16692	True	False
cg10761979	0.0505067	-0.097127	0.0841235	linear	0.097127	False	False
cg02753354	0.043986	0.100022	0.0747192	linear	0.100022	False	False
cg22105145	0.235049	-0.0590629	0.310505	linear	0.0590629	False	False
cg17034109	0.00174731	0.154885	0.00488191	linear	0.154885	True	False
cg15771941	0.238735	0.0586012	0.314566	linear	0.0586012	False	False
cg21643860	0.000790325	-0.165919	0.00252853	linear	0.165919	True	False
cg15415893	7.77459e-05	0.194816	0.000378811	linear	0.194816	True	False
cg04365699	0.00017585	0.185138	0.000736475	linear	0.185138	True	False
cg05890616	7.0723e-09	0.282318	1.66276e-07	linear	0.282318	True	False
cg25338036	0.00394229	0.142775	0.00966299	linear	0.142775	True	False
cg21822635	6.99025e-05	-0.196042	0.000347035	linear	0.196042	True	False
cg17143565	0.305682	-0.0509605	0.38673	linear	0.0509605	False	False
cg24158728	0.440524	-0.0383836	0.522884	linear	0.0383836	False	False
cg16739796	3.89507e-05	-0.202658	0.000215023	linear	0.202658	True	False
cg20998481	0.000206753	0.183159	0.000840797	linear	0.183159	True	False
cg02344373	6.41357e-08	0.264365	1.05925e-06	linear	0.264365	True	False
cg05527337	0.00252597	0.149508	0.00664176	linear	0.149508	True	False
cg19318119	0.0351223	0.104601	0.0616684	linear	0.104601	False	False
cg19771748	0.832393	-0.0105354	0.870319	linear	0.0105354	False	False
cg00958334	0.305719	-0.0509566	0.386771	linear	0.0509566	False	False
cg15229275	0.174413	0.0675356	0.241599	linear	0.0675356	False	False
cg01527486	2.307e-10	0.307892	9.5064e-09	linear	0.307892	True	False
cg08738562	0.00217068	-0.15174	0.00585436	linear	0.15174	True	False
cg22949949	9.03446e-06	0.218318	6.48435e-05	linear	0.218318	True	False
cg03032714	0.415529	0.0405165	0.498437	linear	0.0405165	False	False
cg02732202	0.70425	0.0188953	0.763557	linear	0.0188953	False	False
cg17162981	1.64791e-06	0.235223	1.59216e-05	linear	0.235223	True	False
cg05373161	0.000343056	0.176836	0.00127216	linear	0.176836	True	False
cg08929188	0.193449	-0.0646718	0.263619	linear	0.0646718	False	False
cg11158440	0.040743	-0.101598	0.0700105	linear	0.101598	False	False
cg10960675	0.783858	0.0136545	0.830595	linear	0.0136545	False	False
cg18409196	1.09958e-08	0.278827	2.4121e-07	linear	0.278827	True	False
cg27247569	0.228977	0.0598347	0.303755	linear	0.0598347	False	False
cg10239388	0.196362	-0.064252	0.266965	linear	0.064252	False	False
cg24171294	0.68516	0.0201815	0.747187	linear	0.0201815	False	False
cg01950845	0.654483	-0.0222771	0.720328	linear	0.0222771	False	False
cg04320629	0.10524	0.0805152	0.157306	linear	0.0805152	False	False
cg19556901	0.0816637	-0.0865147	0.126753	linear	0.0865147	False	False
cg00815230	6.3298e-06	0.221962	4.84158e-05	linear	0.221962	True	False
cg14291549	0.385379	0.0431926	0.468699	linear	0.0431926	False	False
cg00612595	0.552174	-0.0295896	0.62874	linear	0.0295896	False	False
cg16589887	9.80905e-08	0.260749	1.51468e-06	linear	0.260749	True	False
cg23106940	3.16748e-09	0.288552	8.48075e-08	linear	0.288552	True	False
cg22151768	1.24546e-07	-0.258692	1.84948e-06	linear	0.258692	True	False
cg03447080	0.00900527	0.129477	0.0194036	linear	0.129477	True	False
cg17705681	0.0402207	0.101862	0.0692298	linear	0.101862	False	False
cg22459739	0.0977489	0.0822936	0.147759	linear	0.0822936	False	False
cg05040232	0.00892579	-0.129626	0.0192585	linear	0.129626	True	False
cg24842760	0.603504	-0.0258512	0.675319	linear	0.0258512	False	False
cg19414706	0.0276909	-0.109275	0.050346	linear	0.109275	False	False
cg11595135	0.918985	0.00506349	0.93861	linear	0.00506349	False	False
cg08707063	0.170857	-0.0680959	0.237476	linear	0.0680959	False	False
cg01875418	0.0553086	-0.095189	0.0909219	linear	0.095189	False	False
cg01921583	0.330885	0.048377	0.413069	linear	0.048377	False	False
cg18186478	8.24443e-10	0.298668	2.75337e-08	linear	0.298668	True	False
cg02874658	0.0227159	0.11305	0.0425452	linear	0.11305	True	False
cg17026072	0.644593	-0.0229611	0.71164	linear	0.0229611	False	False
cg16100486	2.83502e-05	0.206164	0.00016597	linear	0.206164	True	False
cg06221222	0.523428	-0.0317568	0.602111	linear	0.0317568	False	False
cg03785666	0.505562	0.0331344	0.58531	linear	0.0331344	False	False
cg02300114	3.25364e-05	0.204651	0.000185705	linear	0.204651	True	False
cg07003030	0.000222132	-0.182276	0.000890916	linear	0.182276	True	False
cg19265998	0.768868	-0.0146281	0.818112	linear	0.0146281	False	False
cg21856784	5.04676e-09	0.284956	1.25304e-07	linear	0.284956	True	False
cg26788672	0.261127	-0.0558986	0.339195	linear	0.0558986	False	False
cg05567920	0.034983	0.104681	0.0614604	linear	0.104681	False	False
cg19092248	0.245286	0.0577928	0.321851	linear	0.0577928	False	False
cg09504570	0.0217631	-0.113853	0.0410177	linear	0.113853	True	False
cg00862390	1.13982e-06	0.238722	1.17089e-05	linear	0.238722	True	False
cg24151027	0.475738	-0.0354925	0.556935	linear	0.0354925	False	False
cg27650171	0.279198	0.0538319	0.358629	linear	0.0538319	False	False
cg25458340	9.10298e-08	0.261388	1.4228e-06	linear	0.261388	True	False
cg11566152	0.109883	0.0794625	0.163232	linear	0.0794625	False	False
cg24802835	0.0889958	0.0845148	0.136413	linear	0.0845148	False	False
cg10748765	0.0116014	-0.125159	0.0240439	linear	0.125159	True	False
cg01322142	0.00805841	0.131333	0.0176711	linear	0.131333	True	False
cg02479305	0.000268118	-0.17994	0.00103889	linear	0.17994	True	False
cg00305188	0.0139622	-0.121921	0.028126	linear	0.121921	True	False
cg01977082	0.632767	0.0237846	0.701243	linear	0.0237846	False	False
cg00238426	0.000363413	0.176102	0.00133365	linear	0.176102	True	False
cg01839742	6.32382e-05	0.197191	0.00031949	linear	0.197191	True	False
cg25024579	0.00215328	0.151858	0.00581527	linear	0.151858	True	False
cg03927133	0.000324295	0.177549	0.00121452	linear	0.177549	True	False
cg21131424	7.73253e-08	0.26278	1.23911e-06	linear	0.26278	True	False
cg21214508	0.00116152	0.160651	0.00347713	linear	0.160651	True	False
cg19995891	0.00587934	-0.136481	0.0135285	linear	0.136481	True	False
cg14168055	0.000895119	0.164233	0.00280097	linear	0.164233	True	False
cg23831517	0.0251978	0.111086	0.046456	linear	0.111086	True	False
cg10752676	0.0279692	0.109082	0.0507817	linear	0.109082	False	False
cg07583420	0.00291998	-0.147346	0.0075021	linear	0.147346	True	False
cg23765153	2.05912e-10	0.3087	8.64321e-09	linear	0.3087	True	False
cg04026379	0.78007	0.0139001	0.827356	linear	0.0139001	False	False
cg11691990	0.0157776	0.119744	0.0311891	linear	0.119744	True	False
cg03288653	1.0798e-06	0.239232	1.12055e-05	linear	0.239232	True	False
cg12518442	0.34786	0.0467078	0.430637	linear	0.0467078	False	False
cg02895394	0.000105051	0.191302	0.000483706	linear	0.191302	True	False
cg17471760	0.000568998	-0.170295	0.00192716	linear	0.170295	True	False
cg04833885	4.42447e-08	0.267481	7.77791e-07	linear	0.267481	True	False
cg24199006	1.42316e-06	-0.236622	1.40776e-05	linear	0.236622	True	False
cg08605326	0.00320081	-0.145961	0.00810298	linear	0.145961	True	False
cg03403511	7.23393e-06	0.220602	5.40513e-05	linear	0.220602	True	False
cg01436705	0.0902743	-0.0841797	0.138081	linear	0.0841797	False	False
cg22971600	0.000166519	0.185799	0.000704433	linear	0.185799	True	False
cg01330954	0.0267797	0.10992	0.048931	linear	0.10992	True	False
cg17409893	0.590637	-0.026774	0.663578	linear	0.026774	False	False
cg14513570	0.269478	0.0549317	0.348198	linear	0.0549317	False	False
cg06061878	0.600807	-0.0260438	0.672868	linear	0.0260438	False	False
cg11470063	0.002644	0.14883	0.00690337	linear	0.14883	True	False
cg07487572	0.12252	0.076765	0.179022	linear	0.076765	False	False
cg26492446	0.638408	-0.023391	0.706216	linear	0.023391	False	False
cg05555409	1.45366e-05	0.213347	9.59783e-05	linear	0.213347	True	False
cg14235723	0.391829	-0.0426098	0.47517	linear	0.0426098	False	False
cg04702989	0.635067	0.0236239	0.703275	linear	0.0236239	False	False
cg02971654	0.00572715	-0.136902	0.0132315	linear	0.136902	True	False
cg25122536	0.00044827	0.173407	0.0015841	linear	0.173407	True	False
cg09124703	0.22554	-0.0602781	0.299906	linear	0.0602781	False	False
cg08861957	0.000120773	-0.189652	0.000541886	linear	0.189652	True	False
cg19827712	0.200525	-0.06366	0.271668	linear	0.06366	False	False
cg13719443	0.156852	-0.0703917	0.220879	linear	0.0703917	False	False
cg19118972	0.253964	-0.056745	0.331352	linear	0.056745	False	False
cg14575899	0.0052667	0.138239	0.0123341	linear	0.138239	True	False
cg21946524	0.00218949	0.151614	0.00589648	linear	0.151614	True	False
cg00322509	0.000478435	0.172562	0.00167183	linear	0.172562	True	False
cg14135060	2.9326e-09	0.289142	7.95698e-08	linear	0.289142	True	False
cg06602857	0.0159612	-0.119536	0.0314997	linear	0.119536	True	False
cg06578097	2.21725e-07	-0.253651	2.99854e-06	linear	0.253651	True	False
cg11642501	0.00255809	-0.149321	0.00671362	linear	0.149321	True	False
cg10148047	0.0735138	0.0889159	0.115901	linear	0.0889159	False	False
cg05072470	0.345988	-0.0468894	0.428715	linear	0.0468894	False	False
cg27039420	0.0126585	0.123643	0.0258838	linear	0.123643	True	False
cg26284901	0.135289	-0.0742511	0.194758	linear	0.0742511	False	False
cg03144206	0.0340683	-0.10521	0.0600952	linear	0.10521	False	False
cg13564075	0.00143959	-0.157644	0.00415601	linear	0.157644	True	False
cg13782090	0.032385	-0.106215	0.0575358	linear	0.106215	False	False
cg03165752	8.90254e-05	-0.193242	0.000422982	linear	0.193242	True	False
cg13768026	0.646036	0.022861	0.712916	linear	0.022861	False	False
cg12137220	2.28623e-08	0.272927	4.46617e-07	linear	0.272927	True	False
cg03166236	1.21475e-06	0.238122	1.23417e-05	linear	0.238122	True	False
cg23376526	0.087104	-0.0850177	0.133916	linear	0.0850177	False	False
cg16657691	0.55124	0.0296591	0.627895	linear	0.0296591	False	False
cg06586265	0.790325	0.0132361	0.83597	linear	0.0132361	False	False
cg00970396	0.713957	-0.0182461	0.771877	linear	0.0182461	False	False
cg11947187	0.65297	-0.0223815	0.719034	linear	0.0223815	False	False
cg04983128	6.66645e-10	0.30023	2.31269e-08	linear	0.30023	True	False
cg07783477	3.58278e-07	0.249374	4.47528e-06	linear	0.249374	True	False
cg23088508	1.84787e-05	-0.210795	0.000116926	linear	0.210795	True	False
cg27280366	0.00154587	-0.156635	0.00441131	linear	0.156635	True	False
cg01602957	0.000480951	0.172494	0.00167916	linear	0.172494	True	False
cg15296299	0.940964	-0.00368683	0.955321	linear	0.00368683	False	False
cg13156121	1.05131e-05	0.216746	7.34892e-05	linear	0.216746	True	False
cg17153045	0.860124	-0.00877237	0.892618	linear	0.00877237	False	False
cg18784586	0.000943294	-0.163518	0.00292421	linear	0.163518	True	False
cg10931423	0.000521847	0.17143	0.00179511	linear	0.17143	True	False
cg18643215	0.00867918	-0.130096	0.018814	linear	0.130096	True	False
cg12194864	0.0102308	0.127318	0.0216089	linear	0.127318	True	False
cg18604823	0.0268631	0.10986	0.0490624	linear	0.10986	True	False
cg02435538	0.77852	-0.0140006	0.82611	linear	0.0140006	False	False
cg20515580	0.0148346	0.120845	0.0296051	linear	0.120845	True	False
cg08834273	0.000119541	0.189774	0.000537377	linear	0.189774	True	False
cg22796248	0.408464	0.0411329	0.491515	linear	0.0411329	False	False
cg09900585	0.158756	-0.0700708	0.223129	linear	0.0700708	False	False
cg21571339	0.0236825	-0.112264	0.0440816	linear	0.112264	True	False
cg11340785	0.00357109	0.144295	0.00888838	linear	0.144295	True	False
cg07259974	2.50273e-05	0.207523	0.000149972	linear	0.207523	True	False
cg12910175	0.0301859	-0.107598	0.0541768	linear	0.107598	False	False
cg07920195	2.32488e-05	0.208323	0.000141199	linear	0.208323	True	False
cg17621190	0.215865	0.0615526	0.28901	linear	0.0615526	False	False
cg03281154	1.09373e-11	0.328757	7.46233e-10	linear	0.328757	True	False
cg17761815	0.572698	0.028076	0.647447	linear	0.028076	False	False
cg00383793	0.120477	0.0771859	0.176467	linear	0.0771859	False	False
cg08409225	0.00658485	0.13465	0.014896	linear	0.13465	True	False
cg23684973	0.889533	0.0069145	0.915866	linear	0.0069145	False	False
cg04756515	0.348058	0.0466887	0.430845	linear	0.0466887	False	False
cg18437193	0.535205	-0.0308619	0.613094	linear	0.0308619	False	False
cg13324448	0.228958	0.0598372	0.303737	linear	0.0598372	False	False
cg04887172	0.012521	-0.123834	0.02565	linear	0.123834	True	False
cg24691042	0.0174557	0.117919	0.0339956	linear	0.117919	True	False
cg02725013	1.50363e-05	0.21299	9.86844e-05	linear	0.21299	True	False
cg09670127	0.742368	0.0163634	0.795825	linear	0.0163634	False	False
cg20899379	0.0660744	-0.0913053	0.105828	linear	0.0913053	False	False
cg20437276	0.13872	-0.073607	0.198948	linear	0.073607	False	False
cg03250346	0.754557	-0.0155629	0.806112	linear	0.0155629	False	False
cg16438432	0.0287061	0.108577	0.0519141	linear	0.108577	False	False
cg04447284	0.449446	-0.0376392	0.5316	linear	0.0376392	False	False
cg19741777	0.174506	0.0675211	0.241703	linear	0.0675211	False	False
cg24141885	0.807453	-0.0121322	0.850053	linear	0.0121322	False	False
cg13166748	9.15034e-11	0.314393	4.40079e-09	linear	0.314393	True	False
cg01110620	0.723626	-0.0176027	0.779951	linear	0.0176027	False	False
cg08571347	3.3816e-05	0.204225	0.000191623	linear	0.204225	True	False
cg02375320	9.584e-12	0.329625	6.67809e-10	linear	0.329625	True	False
cg03920623	0.0506444	-0.0970694	0.0843173	linear	0.0970694	False	False
cg27116046	9.29603e-07	0.240635	9.89775e-06	linear	0.240635	True	False
cg05695311	0.365965	-0.0449836	0.449144	linear	0.0449836	False	False
cg10823658	0.0808929	0.0867332	0.125744	linear	0.0867332	False	False
cg27517897	0.124333	-0.0763961	0.181268	linear	0.0763961	False	False
cg17646765	0.0040771	-0.142255	0.00994275	linear	0.142255	True	False
cg24801087	0.0016213	0.155956	0.00458829	linear	0.155956	True	False
cg09113483	0.00424946	-0.141612	0.0102958	linear	0.141612	True	False
cg02032552	0.0533265	-0.0959713	0.0881335	linear	0.0959713	False	False
cg14459716	0.197047	0.064154	0.267727	linear	0.064154	False	False
cg21380294	0.655585	-0.0222012	0.721275	linear	0.0222012	False	False
cg07093046	0.00223506	-0.151312	0.00599824	linear	0.151312	True	False
cg05360949	0.0986424	-0.0820759	0.148897	linear	0.0820759	False	False
cg13567404	0.314078	0.0500848	0.395542	linear	0.0500848	False	False
cg02281662	0.00202833	0.15273	0.00553109	linear	0.15273	True	False
cg08923594	0.0121443	-0.124366	0.0249973	linear	0.124366	True	False
cg03967448	2.20051e-06	0.232439	2.02688e-05	linear	0.232439	True	False
cg11669283	4.99953e-10	0.30233	1.81462e-08	linear	0.30233	True	False
cg07128021	0.743645	-0.0162794	0.79688	linear	0.0162794	False	False
cg21114126	0.001676	-0.155482	0.00471629	linear	0.155482	True	False
cg06847558	0.0236024	0.112328	0.0439555	linear	0.112328	True	False
cg14456395	0.00596183	0.136257	0.0136902	linear	0.136257	True	False
cg18655348	7.63097e-08	0.262892	1.2255e-06	linear	0.262892	True	False
cg21236705	0.00918254	0.129149	0.0197266	linear	0.129149	True	False
cg01244953	2.85452e-05	-0.206089	0.0001669	linear	0.206089	True	False
cg12375308	0.00436793	-0.141184	0.0105368	linear	0.141184	True	False
cg23141902	0.919904	-0.00500586	0.939297	linear	0.00500586	False	False
cg16736439	1.25714e-11	0.327838	8.38234e-10	linear	0.327838	True	False
cg08141615	0.905086	-0.00593599	0.928	linear	0.00593599	False	False
cg14312578	0.00194968	0.153304	0.00535191	linear	0.153304	True	False
cg02570527	0.0240346	-0.111985	0.0446325	linear	0.111985	True	False
cg25224090	2.04949e-15	0.380248	6.50416e-13	linear	0.380248	True	False
cg17611446	0.00350638	0.144574	0.00875111	linear	0.144574	True	False
cg03820608	2.37132e-09	0.290761	6.65354e-08	linear	0.290761	True	False
cg10371306	0.991209	-0.00054854	0.993619	linear	0.00054854	False	False
cg09145053	8.52548e-07	0.241442	9.21316e-06	linear	0.241442	True	False
cg16185299	0.0438095	0.100105	0.0744719	linear	0.100105	False	False
cg12863373	0.00140817	-0.157956	0.00407961	linear	0.157956	True	False
cg02027945	0.710128	0.0185019	0.76859	linear	0.0185019	False	False
cg03963219	0.808217	-0.0120831	0.850652	linear	0.0120831	False	False
cg12703269	0.0355951	0.104334	0.0623759	linear	0.104334	False	False
cg07389749	1.89374e-07	0.255041	2.62801e-06	linear	0.255041	True	False
cg22304705	0.309526	0.0505577	0.390835	linear	0.0505577	False	False
cg25728699	0.0521007	-0.0964673	0.0863893	linear	0.0964673	False	False
cg01487433	0.0418425	-0.101052	0.0716117	linear	0.101052	False	False
cg03672021	0.162797	-0.0693992	0.227995	linear	0.0693992	False	False
cg08757448	0.52426	0.0316933	0.602865	linear	0.0316933	False	False
cg04431002	0.52332	-0.0317651	0.602007	linear	0.0317651	False	False
cg04105282	0.0950521	-0.0829603	0.144301	linear	0.0829603	False	False
cg01108800	0.0736481	0.0888746	0.11608	linear	0.0888746	False	False
cg05288033	0.00306127	-0.146634	0.00780532	linear	0.146634	True	False
cg19513987	0.00353653	0.144443	0.00881623	linear	0.144443	True	False
cg22610655	0.550642	-0.0297037	0.627368	linear	0.0297037	False	False
cg23034420	1.51278e-09	0.294155	4.58399e-08	linear	0.294155	True	False
cg26798861	1.06465e-06	0.239364	1.10774e-05	linear	0.239364	True	False
cg20072118	0.0141562	0.121676	0.0284557	linear	0.121676	True	False
cg04611865	0.0936608	-0.0833103	0.142513	linear	0.0833103	False	False
cg23448635	0.429922	-0.0392795	0.512521	linear	0.0392795	False	False
cg21614723	0.034763	-0.104807	0.0611348	linear	0.104807	False	False
cg03224627	0.420423	0.0400931	0.503118	linear	0.0400931	False	False
cg00388391	0.00620174	-0.135621	0.0141596	linear	0.135621	True	False
cg21361856	5.35569e-07	0.245729	6.24778e-06	linear	0.245729	True	False
cg13930643	0.0307292	-0.107248	0.0550131	linear	0.107248	False	False
cg11657849	0.000135817	0.188253	0.000596171	linear	0.188253	True	False
cg13840308	0.0399348	0.102008	0.0688102	linear	0.102008	False	False
cg01338430	0.0372629	-0.103413	0.0648654	linear	0.103413	False	False
cg15391452	5.96525e-08	0.264976	9.9732e-07	linear	0.264976	True	False
cg20056076	0.00236921	0.150455	0.00629618	linear	0.150455	True	False
cg10635212	0.239564	-0.058498	0.315484	linear	0.058498	False	False
cg00372692	8.50214e-06	0.218944	6.16768e-05	linear	0.218944	True	False
cg19079233	1.25983e-05	0.214855	8.53941e-05	linear	0.214855	True	False
cg11854777	2.44924e-05	0.207758	0.000147313	linear	0.207758	True	False
cg11832339	4.52028e-06	0.225355	3.66885e-05	linear	0.225355	True	False
cg04058748	0.0960777	0.082705	0.145623	linear	0.082705	False	False
cg23906876	0.0131629	0.122959	0.026756	linear	0.122959	True	False
cg12669395	3.03302e-09	0.288884	8.18144e-08	linear	0.288884	True	False
cg15035217	3.28463e-07	0.250154	4.16267e-06	linear	0.250154	True	False
cg07466892	0.0577782	-0.0942461	0.0943878	linear	0.0942461	False	False
cg07093942	0.117857	-0.0777338	0.173205	linear	0.0777338	False	False
cg16651732	0.920128	-0.0049918	0.93947	linear	0.0049918	False	False
cg02517342	5.4854e-08	0.265682	9.30542e-07	linear	0.265682	True	False
cg01981596	0.00701594	0.133616	0.0157149	linear	0.133616	True	False
cg10782019	0.00501139	0.139026	0.0118244	linear	0.139026	True	False
cg10407113	7.01892e-05	0.195995	0.000348264	linear	0.195995	True	False
cg17388683	0.117025	0.0779098	0.172151	linear	0.0779098	False	False
cg10965432	0.00114367	-0.160866	0.00343265	linear	0.160866	True	False
cg09663193	0.00575406	0.136827	0.0132843	linear	0.136827	True	False
cg19000349	0.224453	-0.0604194	0.298687	linear	0.0604194	False	False
cg26544377	4.36736e-09	0.286077	1.11188e-07	linear	0.286077	True	False
cg08464897	0.00346621	0.14475	0.00866672	linear	0.14475	True	False
cg25042430	0.269676	-0.0549091	0.348422	linear	0.0549091	False	False
cg23782616	0.142357	0.0729372	0.20341	linear	0.0729372	False	False
cg13483597	0.102032	-0.081264	0.153223	linear	0.081264	False	False
cg25510895	0.00102656	0.162358	0.00313766	linear	0.162358	True	False
cg23987137	0.695441	-0.0194872	0.755954	linear	0.0194872	False	False
cg00518694	0.933021	0.00418392	0.949218	linear	0.00418392	False	False
cg27071065	0.815207	0.0116345	0.856259	linear	0.0116345	False	False
cg05509697	7.83502e-05	-0.194726	0.000381233	linear	0.194726	True	False
cg22882178	0.0877328	-0.0848496	0.134751	linear	0.0848496	False	False
cg13896783	0.000340296	-0.176938	0.0012638	linear	0.176938	True	False
cg20470857	0.858322	-0.00888653	0.891207	linear	0.00888653	False	False
cg06534586	0.0517626	0.0966058	0.0859108	linear	0.0966058	False	False
cg00811382	0.00810349	0.13124	0.0177538	linear	0.13124	True	False
cg02592416	0.278007	-0.0539652	0.357355	linear	0.0539652	False	False
cg18664856	4.67632e-09	0.285548	1.17561e-07	linear	0.285548	True	False
cg25360059	0.000747152	0.166675	0.00241381	linear	0.166675	True	False
cg24946597	0.31119	0.0503842	0.39255	linear	0.0503842	False	False
cg15797971	3.8556e-06	-0.22694	3.21962e-05	linear	0.22694	True	False
cg03178489	7.74029e-07	0.242339	8.49991e-06	linear	0.242339	True	False
cg11171466	0.794964	0.0129365	0.839813	linear	0.0129365	False	False
cg10289055	0.000129484	0.188823	0.000573478	linear	0.188823	True	False
cg00596048	0.000194614	-0.183901	0.000800467	linear	0.183901	True	False
cg12044654	0.334924	0.047975	0.417272	linear	0.047975	False	False
cg27537795	6.78715e-08	0.263886	1.11124e-06	linear	0.263886	True	False
cg05279137	0.650697	-0.0225384	0.717022	linear	0.0225384	False	False
cg07835668	0.739295	-0.0165659	0.793247	linear	0.0165659	False	False
cg10541534	0.1034	0.0809425	0.154974	linear	0.0809425	False	False
cg05937603	0.0308067	0.107199	0.0551329	linear	0.107199	False	False
cg20557687	0.00198613	-0.153035	0.00543521	linear	0.153035	True	False
cg18579195	6.08404e-05	-0.197633	0.000309601	linear	0.197633	True	False
cg06134471	0.00353255	0.144461	0.00880763	linear	0.144461	True	False
cg25205758	0.184796	-0.0659464	0.253652	linear	0.0659464	False	False
cg18942222	2.69882e-05	-0.206702	0.000159477	linear	0.206702	True	False
cg25369553	0.0815031	0.0865601	0.126541	linear	0.0865601	False	False
cg21590753	1.6157e-08	0.275742	3.33376e-07	linear	0.275742	True	False
cg18768157	0.833208	-0.0104834	0.870926	linear	0.0104834	False	False
cg01844176	0.0506609	0.0970624	0.0843424	linear	0.0970624	False	False
cg09223632	0.171748	-0.0679547	0.238514	linear	0.0679547	False	False
cg09216823	3.01922e-09	0.288919	8.15236e-08	linear	0.288919	True	False
cg11281005	0.104095	0.0807804	0.155857	linear	0.0807804	False	False
cg20099464	0.000462117	0.173013	0.00162494	linear	0.173013	True	False
cg08580056	0.00173344	-0.154999	0.00484907	linear	0.154999	True	False
cg20592707	0.000444359	0.17352	0.00157262	linear	0.17352	True	False
cg00844429	2.54866e-05	0.207325	0.000152222	linear	0.207325	True	False
cg19916100	0.122136	-0.0768437	0.178545	linear	0.0768437	False	False
cg07804196	1.76404e-06	0.234571	1.6861e-05	linear	0.234571	True	False
cg20065832	0.000391604	-0.175147	0.00141818	linear	0.175147	True	False
cg23869745	0.425137	-0.0396881	0.507807	linear	0.0396881	False	False
cg09827761	0.871536	0.00805012	0.901695	linear	0.00805012	False	False
cg21206277	0.00118668	-0.160353	0.00353981	linear	0.160353	True	False
cg09415274	0.292662	0.0523503	0.372983	linear	0.0523503	False	False
cg23083824	0.160184	-0.069832	0.224856	linear	0.069832	False	False
cg02455723	0.0616335	-0.0928389	0.0997417	linear	0.0928389	False	False
cg18730862	0.220574	-0.0609272	0.294351	linear	0.0609272	False	False
cg02878461	0.00284818	0.147719	0.00734649	linear	0.147719	True	False
cg21242004	8.28043e-13	0.345253	8.73931e-11	linear	0.345253	True	False
cg27037990	0.00121541	-0.16002	0.00361022	linear	0.16002	True	False
cg01398148	1.15644e-05	0.215752	7.95352e-05	linear	0.215752	True	False
cg12318316	3.61257e-05	-0.203494	0.000202243	linear	0.203494	True	False
cg04207142	0.0298804	0.107796	0.0537104	linear	0.107796	False	False
cg00382919	0.00166756	0.155554	0.00469601	linear	0.155554	True	False
cg17055704	0.519928	0.0320248	0.598775	linear	0.0320248	False	False
cg24737593	0.000877919	-0.164496	0.00275665	linear	0.164496	True	False
cg23919670	0.000724335	-0.167091	0.00235186	linear	0.167091	True	False
cg17258335	0.66951	-0.0212458	0.733514	linear	0.0212458	False	False
cg20547724	3.3191e-05	0.204431	0.000188719	linear	0.204431	True	False
cg04549288	0.456219	-0.0370796	0.53819	linear	0.0370796	False	False
cg13849371	1.58407e-05	-0.212437	0.000103011	linear	0.212437	True	False
cg24504442	0.00938432	0.128783	0.0200892	linear	0.128783	True	False
cg10887757	0.153373	-0.0709858	0.216692	linear	0.0709858	False	False
cg19358608	0.672972	-0.0210096	0.736579	linear	0.0210096	False	False
cg12601963	0.00268322	0.148611	0.00698763	linear	0.148611	True	False
cg13130271	0.91791	0.00513093	0.93781	linear	0.00513093	False	False
cg12406726	0.125512	-0.0761584	0.182744	linear	0.0761584	False	False
cg22379574	0.58564	0.0271347	0.659077	linear	0.0271347	False	False
cg06552160	5.89915e-09	0.283739	1.42822e-07	linear	0.283739	True	False
cg01125381	0.0665282	-0.0911534	0.106448	linear	0.0911534	False	False
cg05652840	0.0462812	-0.0989642	0.0780464	linear	0.0989642	False	False
cg22507406	0.00022938	0.18188	0.000914289	linear	0.18188	True	False
cg02322989	0.00707715	-0.133474	0.0158303	linear	0.133474	True	False
cg13708158	0.148383	-0.0718561	0.21073	linear	0.0718561	False	False
cg13628577	0.428346	-0.0394138	0.510976	linear	0.0394138	False	False
cg00643651	4.72718e-06	0.224907	3.80827e-05	linear	0.224907	True	False
cg04474832	0.0114794	-0.125342	0.0238297	linear	0.125342	True	False
cg22872857	6.16412e-05	0.197484	0.000312991	linear	0.197484	True	False
cg26487088	1.40148e-14	0.369496	3.1408e-12	linear	0.369496	True	False
cg10423842	0.375867	-0.044063	0.459105	linear	0.044063	False	False
cg13277380	0.000254469	0.180592	0.000995165	linear	0.180592	True	False
cg03902391	0.047127	0.0985855	0.0792578	linear	0.0985855	False	False
cg10496150	5.52746e-05	0.198724	0.000286203	linear	0.198724	True	False
cg06251068	0.00165814	-0.155635	0.00467417	linear	0.155635	True	False
cg25027273	6.46973e-09	0.283017	1.54404e-07	linear	0.283017	True	False
cg18591441	0.0271389	-0.109664	0.0494898	linear	0.109664	True	False
cg24156983	0.0531214	0.0960536	0.0878475	linear	0.0960536	False	False
cg03210912	0.534874	-0.0308869	0.612785	linear	0.0308869	False	False
cg24034412	0.00284284	-0.147747	0.00733498	linear	0.147747	True	False
cg01101911	1.28007e-08	0.277613	2.74416e-07	linear	0.277613	True	False
cg21931656	0.000427163	-0.17403	0.00152236	linear	0.17403	True	False
cg08561856	0.419039	-0.0402126	0.501783	linear	0.0402126	False	False
cg13447454	0.000530039	0.171226	0.00181756	linear	0.171226	True	False
cg07657332	0.000518402	0.171517	0.0017854	linear	0.171517	True	False
cg08975917	5.19748e-11	0.318293	2.7396e-09	linear	0.318293	True	False
cg01868612	0.000217512	-0.182535	0.000875889	linear	0.182535	True	False
cg12649455	2.75989e-08	0.271386	5.24069e-07	linear	0.271386	True	False
cg03220671	0.000183532	0.184617	0.000762736	linear	0.184617	True	False
cg01745726	0.160919	-0.0697098	0.225728	linear	0.0697098	False	False
cg00287773	0.100023	-0.0817425	0.150656	linear	0.0817425	False	False
cg26015973	0.667263	-0.0213995	0.731548	linear	0.0213995	False	False
cg09888049	0.000165332	0.185886	0.000700379	linear	0.185886	True	False
cg06179971	0.506322	-0.0330753	0.58603	linear	0.0330753	False	False
cg03119028	0.000854137	0.164869	0.00269517	linear	0.164869	True	False
cg03387256	0.000209477	-0.182999	0.000849633	linear	0.182999	True	False
cg19832898	1.01118e-06	0.239848	1.0616e-05	linear	0.239848	True	False
cg20170831	0.0239831	-0.112025	0.0445522	linear	0.112025	True	False
cg06589757	0.770294	-0.0145353	0.819315	linear	0.0145353	False	False
cg25100532	0.887994	-0.00701144	0.914669	linear	0.00701144	False	False
cg18809830	0.774852	-0.0142388	0.823111	linear	0.0142388	False	False
cg27642470	0.00193807	-0.15339	0.0053249	linear	0.15339	True	False
cg22824415	0.0382381	-0.10289	0.0663135	linear	0.10289	False	False
cg25744682	4.13224e-09	0.286505	1.0616e-07	linear	0.286505	True	False
cg03478249	0.0148775	-0.120794	0.0296772	linear	0.120794	True	False
cg10854441	3.9412e-06	-0.226722	3.27845e-05	linear	0.226722	True	False
cg06130714	0.110953	0.079225	0.16459	linear	0.079225	False	False
cg10627301	9.94043e-06	0.217328	7.01604e-05	linear	0.217328	True	False
cg10989870	0.215428	-0.061611	0.28851	linear	0.061611	False	False
cg00023132	5.18447e-06	-0.22398	4.10873e-05	linear	0.22398	True	False
cg06984255	0.00325363	0.145713	0.00821561	linear	0.145713	True	False
cg12376086	0.02655	-0.110086	0.0485687	linear	0.110086	True	False
cg11601115	0.00184975	0.154065	0.00512113	linear	0.154065	True	False
cg19190728	0.0334183	-0.105593	0.0591111	linear	0.105593	False	False
cg05852052	0.0129785	0.123206	0.0264399	linear	0.123206	True	False
cg13451008	7.59482e-09	0.281758	1.76602e-07	linear	0.281758	True	False
cg26284735	0.0121744	-0.124323	0.0250474	linear	0.124323	True	False
cg00689612	2.67194e-06	0.230551	2.37962e-05	linear	0.230551	True	False
cg05393297	0.196761	-0.0641949	0.267418	linear	0.0641949	False	False
cg02228294	0.153541	0.0709569	0.216893	linear	0.0709569	False	False
cg19694519	0.557362	0.0292044	0.63348	linear	0.0292044	False	False
cg20400592	0.0026595	0.148743	0.00693697	linear	0.148743	True	False
cg14308509	6.8447e-05	0.196284	0.000341076	linear	0.196284	True	False
cg10493075	2.19808e-07	0.253728	2.97606e-06	linear	0.253728	True	False
cg20179942	7.64195e-06	0.22004	5.65038e-05	linear	0.22004	True	False
cg19965312	0.118569	0.077584	0.174094	linear	0.077584	False	False
cg00868383	0.754003	-0.0155992	0.805634	linear	0.0155992	False	False
cg23461714	0.576036	0.0278323	0.650426	linear	0.0278323	False	False
cg12304663	1.35136e-05	0.214118	9.04384e-05	linear	0.214118	True	False
cg16875280	0.0197646	-0.115643	0.0377863	linear	0.115643	True	False
cg03193349	0.00335739	-0.145236	0.0084369	linear	0.145236	True	False
cg23457268	3.17898e-13	0.351131	3.9718e-11	linear	0.351131	True	False
cg19621579	9.3977e-06	-0.21791	6.69619e-05	linear	0.21791	True	False
cg23735602	1.10784e-12	0.34344	1.10471e-10	linear	0.34344	True	False
cg12078033	0.00133682	0.158687	0.00390842	linear	0.158687	True	False
cg05903630	0.00261506	-0.148994	0.0068395	linear	0.148994	True	False
cg09814128	0.0220226	0.113632	0.0414346	linear	0.113632	True	False
cg27200454	0.833755	-0.0104485	0.87138	linear	0.0104485	False	False
cg00376022	0.0611779	-0.0930014	0.0991119	linear	0.0930014	False	False
cg05773108	5.92571e-10	0.301091	2.09537e-08	linear	0.301091	True	False
cg01768868	3.38853e-05	0.204203	0.000191932	linear	0.204203	True	False
cg01774310	0.00129887	-0.159092	0.00381535	linear	0.159092	True	False
cg17020398	0.0047065	0.140015	0.0112197	linear	0.140015	True	False
cg05795316	0.175976	-0.067292	0.243435	linear	0.067292	False	False
cg24685239	0.0449078	0.0995917	0.0760583	linear	0.0995917	False	False
cg04700361	0.000858412	0.164801	0.00270636	linear	0.164801	True	False
cg22383924	0.00121504	0.160024	0.00360944	linear	0.160024	True	False
cg21242417	0.80904	0.0120302	0.851289	linear	0.0120302	False	False
cg01172965	0.411612	-0.0408575	0.494603	linear	0.0408575	False	False
cg10306035	0.057967	0.0941754	0.094652	linear	0.0941754	False	False
cg03146733	0.000487313	0.172323	0.00169743	linear	0.172323	True	False
cg10243567	0.124761	-0.0763095	0.181813	linear	0.0763095	False	False
cg13201995	0.000323077	0.177596	0.00121072	linear	0.177596	True	False
cg26970983	3.06719e-05	0.2053	0.000176994	linear	0.2053	True	False
cg05827944	0.550721	0.0296977	0.627434	linear	0.0296977	False	False
cg14509299	1.45659e-11	0.326863	9.47796e-10	linear	0.326863	True	False
cg24562268	0.300466	-0.0515124	0.381219	linear	0.0515124	False	False
cg05857941	0.634366	0.0236729	0.702637	linear	0.0236729	False	False
cg09333584	0.349873	-0.0465134	0.432696	linear	0.0465134	False	False
cg02960688	0.978394	-0.00134821	0.984057	linear	0.00134821	False	False
cg14047153	0.250429	-0.0571688	0.327435	linear	0.0571688	False	False
cg10291119	5.44679e-05	0.198891	0.00028277	linear	0.198891	True	False
cg26133909	0.000497769	0.172047	0.0017269	linear	0.172047	True	False
cg03965827	0.00202056	-0.152785	0.00551314	linear	0.152785	True	False
cg14500628	0.0239901	-0.11202	0.0445628	linear	0.11202	True	False
cg20128772	0.0173095	-0.118071	0.0337527	linear	0.118071	True	False
cg02611811	4.46537e-09	0.285905	1.13181e-07	linear	0.285905	True	False
cg08883074	0.00781909	-0.131833	0.0172259	linear	0.131833	True	False
cg27070902	0.000203969	0.183326	0.000831479	linear	0.183326	True	False
cg11394278	4.7148e-12	0.334244	3.69907e-10	linear	0.334244	True	False
cg15409939	0.000856661	-0.164829	0.00270202	linear	0.164829	True	False
cg19596204	0.0948901	-0.0830009	0.144096	linear	0.0830009	False	False
cg26431018	6.33065e-12	0.332335	4.73203e-10	linear	0.332335	True	False
cg16663955	0.00554352	0.137423	0.0128771	linear	0.137423	True	False
cg00431894	0.445467	0.0379701	0.527724	linear	0.0379701	False	False
cg14338830	0.000104462	0.191368	0.000481427	linear	0.191368	True	False
cg10632093	2.34361e-05	-0.208236	0.000142144	linear	0.208236	True	False
cg07914959	0.00906794	-0.129361	0.0195168	linear	0.129361	True	False
cg03691429	0.974531	0.00158937	0.981172	linear	0.00158937	False	False
cg06310589	0.548709	-0.0298478	0.625564	linear	0.0298478	False	False
cg00582671	7.21773e-07	0.242987	8.01914e-06	linear	0.242987	True	False
cg16842187	0.116311	-0.0780618	0.171266	linear	0.0780618	False	False
cg15143788	0.756119	0.0154607	0.807428	linear	0.0154607	False	False
cg22718729	0.204139	-0.0631532	0.275749	linear	0.0631532	False	False
cg10219789	0.957693	-0.00264092	0.968351	linear	0.00264092	False	False
cg17786864	0.000274887	0.179628	0.00106021	linear	0.179628	True	False
cg07637365	0.0098487	-0.127965	0.0209313	linear	0.127965	True	False
cg02241814	0.0318013	-0.106574	0.056654	linear	0.106574	False	False
cg01835144	0.87963	-0.00753891	0.908065	linear	0.00753891	False	False
cg01616797	0.00282954	0.147817	0.00730633	linear	0.147817	True	False
cg12728461	1.6005e-14	0.368738	3.51175e-12	linear	0.368738	True	False
cg27664614	0.00560689	0.137241	0.0129985	linear	0.137241	True	False
cg10215763	0.556135	0.0292954	0.632374	linear	0.0292954	False	False
cg12551582	0.0217072	-0.113902	0.0409252	linear	0.113902	True	False
cg01710865	0.526968	0.0314868	0.605403	linear	0.0314868	False	False
cg16637556	0.00555131	-0.1374	0.012892	linear	0.1374	True	False
cg13618137	0.146649	-0.0721639	0.208607	linear	0.0721639	False	False
cg18684951	0.407292	0.0412358	0.490377	linear	0.0412358	False	False
cg05624564	1.94074e-07	0.254825	2.68331e-06	linear	0.254825	True	False
cg22061809	6.76103e-05	-0.196425	0.000337581	linear	0.196425	True	False
cg05618767	0.742399	0.0163614	0.795852	linear	0.0163614	False	False
cg04895387	2.22167e-05	-0.208814	0.000136008	linear	0.208814	True	False
cg13068915	0.000213213	0.182781	0.000862024	linear	0.182781	True	False
cg23787205	0.00089701	0.164204	0.002806	linear	0.164204	True	False
cg00434461	0.0106843	-0.126576	0.0224159	linear	0.126576	True	False
cg27440523	0.437261	0.038658	0.519652	linear	0.038658	False	False
cg24362016	8.33554e-07	0.241651	9.04252e-06	linear	0.241651	True	False
cg22035498	0.0308391	-0.107178	0.0551844	linear	0.107178	False	False
cg06730409	0.00110133	0.161388	0.00332742	linear	0.161388	True	False
cg11717782	0.131346	-0.075007	0.189907	linear	0.075007	False	False
cg07704627	0.000651419	-0.168506	0.00215376	linear	0.168506	True	False
cg25527070	0.577082	-0.027756	0.65135	linear	0.027756	False	False
cg12656666	0.253142	-0.0568431	0.330442	linear	0.0568431	False	False
cg03126199	2.28695e-06	0.232066	2.09278e-05	linear	0.232066	True	False
cg01499172	0.117046	-0.0779055	0.172173	linear	0.0779055	False	False
cg00259966	0.189405	-0.0652621	0.258983	linear	0.0652621	False	False
cg12732864	2.28012e-06	0.232095	2.08768e-05	linear	0.232095	True	False
cg14570652	0.15206	-0.0712128	0.2151	linear	0.0712128	False	False
cg10511850	0.00379286	0.14337	0.00935423	linear	0.14337	True	False
cg04828158	0.347447	0.0467479	0.430216	linear	0.0467479	False	False
cg05875696	0.0012313	0.159839	0.00365012	linear	0.159839	True	False
cg19078576	4.72893e-06	0.224903	3.80921e-05	linear	0.224903	True	False
cg01968402	0.235255	-0.0590371	0.310723	linear	0.0590371	False	False
cg05094429	2.16158e-09	0.291464	6.16069e-08	linear	0.291464	True	False
cg22643918	0.081049	0.0866888	0.125951	linear	0.0866888	False	False
cg24317742	0.00803924	0.131373	0.017634	linear	0.131373	True	False
cg08815081	0.999433	-3.53517e-05	0.999591	linear	3.53517e-05	False	False
cg05383783	0.467427	-0.0361638	0.549024	linear	0.0361638	False	False
cg14157019	0.441916	-0.038267	0.52422	linear	0.038267	False	False
cg27478863	1.18556e-07	-0.259118	1.77416e-06	linear	0.259118	True	False
cg09234599	0.00130548	-0.15902	0.00383109	linear	0.15902	True	False
cg21759837	0.663078	-0.0216861	0.727905	linear	0.0216861	False	False
cg22920498	0.000149827	-0.187075	0.000646065	linear	0.187075	True	False
cg03870448	0.0184091	0.116949	0.0355744	linear	0.116949	True	False
cg09591519	0.192001	0.064882	0.261951	linear	0.064882	False	False
cg10924080	0.006551	0.134734	0.0148315	linear	0.134734	True	False
cg02927519	0.397137	-0.0421345	0.480396	linear	0.0421345	False	False
cg05221370	0.0348236	-0.104772	0.0612228	linear	0.104772	False	False
cg24052359	0.215119	-0.0616525	0.288156	linear	0.0616525	False	False
cg04013419	3.23864e-07	0.250281	4.11475e-06	linear	0.250281	True	False
cg07691152	0.588714	-0.0269127	0.661855	linear	0.0269127	False	False
cg10778249	0.0223995	0.113314	0.0420404	linear	0.113314	True	False
cg04671734	2.52309e-05	-0.207435	0.000150978	linear	0.207435	True	False
cg08711175	0.0388946	0.102545	0.067286	linear	0.102545	False	False
cg04230029	8.34655e-06	0.219134	6.0785e-05	linear	0.219134	True	False
cg26863534	0.00193179	-0.153437	0.00531052	linear	0.153437	True	False
cg02347773	0.0307288	-0.107248	0.055013	linear	0.107248	False	False
cg10580110	0.00726079	0.133054	0.0161757	linear	0.133054	True	False
cg07898764	0.0909268	-0.0840102	0.138945	linear	0.0840102	False	False
cg03639783	0.0190961	-0.116277	0.0366968	linear	0.116277	True	False
cg27299484	0.000374971	0.175702	0.00136846	linear	0.175702	True	False
cg02576381	0.340796	-0.047396	0.42338	linear	0.047396	False	False
cg14487188	5.73815e-11	0.317615	2.97437e-09	linear	0.317615	True	False
cg18708460	0.864913	0.00846906	0.896432	linear	0.00846906	False	False
cg18396714	0.000277213	0.179523	0.00106747	linear	0.179523	True	False
cg06975914	1.00898e-06	0.239868	1.05947e-05	linear	0.239868	True	False
cg08250081	0.155025	-0.0707025	0.218674	linear	0.0707025	False	False
cg27181183	0.151482	0.0713131	0.214411	linear	0.0713131	False	False
cg04740931	0.000818297	0.16545	0.00260211	linear	0.16545	True	False
cg05175213	1.72607e-05	0.211524	0.000110583	linear	0.211524	True	False
cg01300105	5.11846e-05	0.199595	0.000268698	linear	0.199595	True	False
cg20571967	0.618146	-0.0248118	0.688368	linear	0.0248118	False	False
cg03364381	0.0428831	-0.100547	0.0731292	linear	0.100547	False	False
cg25636556	0.960503	-0.00246534	0.970495	linear	0.00246534	False	False
cg12231340	0.662511	0.021725	0.727422	linear	0.021725	False	False
cg17769705	0.273383	-0.0544867	0.352437	linear	0.0544867	False	False
cg25892286	0.131132	0.0750485	0.189651	linear	0.0750485	False	False
cg00834899	0.0468238	0.0987206	0.0788206	linear	0.0987206	False	False
cg12119715	0.569207	0.0283316	0.644272	linear	0.0283316	False	False
cg00385883	9.23613e-07	0.240695	9.84369e-06	linear	0.240695	True	False
cg04175833	0.911352	-0.00554246	0.932794	linear	0.00554246	False	False
cg02568761	0.00323836	0.145784	0.00818341	linear	0.145784	True	False
cg26896771	0.098632	-0.0820784	0.148886	linear	0.0820784	False	False
cg13459291	3.32716e-08	0.269847	6.11863e-07	linear	0.269847	True	False
cg03609666	0.255632	-0.0565464	0.333214	linear	0.0565464	False	False
cg10447827	0.0663842	0.0912015	0.106255	linear	0.0912015	False	False
cg16331972	0.573745	-0.0279995	0.648386	linear	0.0279995	False	False
cg09915835	0.0230919	0.112741	0.0431481	linear	0.112741	True	False
cg26574003	0.00608534	0.135927	0.0139331	linear	0.135927	True	False
cg14690649	0.0949902	-0.0829758	0.144222	linear	0.0829758	False	False
cg12319871	0.123834	-0.0764972	0.180653	linear	0.0764972	False	False
cg06649410	0.724509	-0.017544	0.780698	linear	0.017544	False	False
cg16250461	0.802452	-0.0124539	0.845897	linear	0.0124539	False	False
cg07031794	5.90968e-05	-0.197964	0.000302356	linear	0.197964	True	False
cg23127986	0.0325678	0.106103	0.0578075	linear	0.106103	False	False
cg22158648	0.000181484	0.184754	0.00075567	linear	0.184754	True	False
cg25493276	0.000384162	0.175393	0.00139604	linear	0.175393	True	False
cg19974283	2.03836e-05	0.209742	0.000126742	linear	0.209742	True	False
cg21503053	0.000181049	0.184783	0.000754158	linear	0.184783	True	False
cg11945905	7.36778e-07	0.242796	8.15842e-06	linear	0.242796	True	False
cg08211895	1.44867e-05	0.213384	9.56971e-05	linear	0.213384	True	False
cg20587996	1.22341e-09	0.295743	3.83742e-08	linear	0.295743	True	False
cg15731772	0.00779459	0.131885	0.0171808	linear	0.131885	True	False
cg22960133	0.0019818	0.153067	0.00542561	linear	0.153067	True	False
cg03855291	0.937349	0.00391302	0.952514	linear	0.00391302	False	False
cg01014113	1.86073e-17	0.404989	1.44015e-14	linear	0.404989	True	True
cg18251612	0.930987	0.00431129	0.947692	linear	0.00431129	False	False
cg22343728	0.00760863	0.132284	0.0168304	linear	0.132284	True	False
cg10224592	8.53129e-05	0.193738	0.000408672	linear	0.193738	True	False
cg22506042	0.0164863	0.118953	0.0323838	linear	0.118953	True	False
cg02993533	0.166755	-0.0687534	0.232655	linear	0.0687534	False	False
cg26597539	0.000233554	-0.181656	0.000927718	linear	0.181656	True	False
cg17106450	0.764893	0.0148872	0.814778	linear	0.0148872	False	False
cg15948871	0.0122375	0.124233	0.02516	linear	0.124233	True	False
cg12727040	0.00536451	0.137946	0.0125272	linear	0.137946	True	False
cg04018622	0.117153	-0.0778827	0.172311	linear	0.0778827	False	False
cg16327381	0.000348818	-0.176624	0.00128946	linear	0.176624	True	False
cg26365152	2.24547e-06	-0.232243	2.0613e-05	linear	0.232243	True	False
cg06149389	0.0359189	-0.104152	0.0628601	linear	0.104152	False	False
cg04451448	0.0186438	0.116717	0.0359616	linear	0.116717	True	False
cg26140120	0.232381	0.0594004	0.307563	linear	0.0594004	False	False
cg11235015	0.688659	-0.0199447	0.750225	linear	0.0199447	False	False
cg08142821	4.33785e-09	0.28613	1.10575e-07	linear	0.28613	True	False
cg21907993	0.00336259	0.145212	0.00844774	linear	0.145212	True	False
cg19504001	2.11932e-09	0.291614	6.05906e-08	linear	0.291614	True	False
cg07273222	0.000833234	0.165205	0.00264087	linear	0.165205	True	False
cg15024309	0.00990002	0.127877	0.0210195	linear	0.127877	True	False
cg27579618	0.106061	0.0803264	0.158354	linear	0.0803264	False	False
cg23183069	0.221021	0.0608683	0.294867	linear	0.0608683	False	False
cg08992324	0.56356	-0.0287466	0.639129	linear	0.0287466	False	False
cg26071631	0.0691913	0.0902787	0.110045	linear	0.0902787	False	False
cg25401027	5.06516e-08	0.26635	8.71626e-07	linear	0.26635	True	False
cg13844287	0.000231229	0.18178	0.000920258	linear	0.18178	True	False
cg01154355	0.000363391	0.176103	0.00133359	linear	0.176103	True	False
cg18340445	0.554199	-0.029439	0.630614	linear	0.029439	False	False
cg11238366	0.526875	-0.0314939	0.60532	linear	0.0314939	False	False
cg17442683	0.149989	0.0715737	0.212644	linear	0.0715737	False	False
cg23858558	0.0741002	0.0887361	0.116696	linear	0.0887361	False	False
cg23697400	0.109244	-0.0796054	0.162418	linear	0.0796054	False	False
cg12903171	0.000490736	-0.172232	0.00170714	linear	0.172232	True	False
cg15804426	0.00917248	0.129168	0.0197082	linear	0.129168	True	False
cg23348010	7.11733e-06	0.220768	5.33288e-05	linear	0.220768	True	False
cg07048672	0.0153929	-0.120186	0.0305414	linear	0.120186	True	False
cg13782561	0.954459	-0.00284302	0.965872	linear	0.00284302	False	False
cg11726986	0.015854	-0.119657	0.0313176	linear	0.119657	True	False
cg14381452	0.000119455	0.189783	0.000537076	linear	0.189783	True	False
cg24849872	3.00891e-05	0.205511	0.000174278	linear	0.205511	True	False
cg19772907	0.422396	-0.0399233	0.505129	linear	0.0399233	False	False
cg01454519	6.68706e-06	0.221404	5.06574e-05	linear	0.221404	True	False
cg01722584	0.000522337	0.171418	0.00179639	linear	0.171418	True	False
cg05815404	0.188744	0.0653595	0.258216	linear	0.0653595	False	False
cg13765303	0.044577	-0.0997452	0.0755752	linear	0.0997452	False	False
cg08711013	0.304459	-0.0510893	0.385471	linear	0.0510893	False	False
cg19460095	0.00383393	0.143205	0.00943901	linear	0.143205	True	False
cg03459811	8.47247e-05	0.193818	0.00040629	linear	0.193818	True	False
cg05197447	0.0270918	0.109697	0.0494178	linear	0.109697	True	False
cg11456838	8.32641e-06	0.219159	6.06624e-05	linear	0.219159	True	False
cg03688118	0.00140768	0.157961	0.00407848	linear	0.157961	True	False
cg15134583	0.666891	-0.021425	0.731205	linear	0.021425	False	False
cg23817297	0.128052	0.0756521	0.185863	linear	0.0756521	False	False
cg20959032	0.00502624	0.138979	0.0118536	linear	0.138979	True	False
cg19013682	0.00345191	0.144813	0.00863827	linear	0.144813	True	False
cg16002075	0.0015884	0.156248	0.00451109	linear	0.156248	True	False
cg05371867	7.03724e-05	-0.195965	0.000349011	linear	0.195965	True	False
cg19031271	0.000328537	-0.177384	0.0012276	linear	0.177384	True	False
cg20544357	0.0286225	-0.108634	0.0517872	linear	0.108634	False	False
cg27541349	0.0121589	-0.124345	0.0250214	linear	0.124345	True	False
cg22829706	2.7183e-11	0.322694	1.5933e-09	linear	0.322694	True	False
cg01857475	0.0305514	0.107362	0.0547429	linear	0.107362	False	False
cg16668176	0.0268077	0.1099	0.0489739	linear	0.1099	True	False
cg23403980	0.0316524	-0.106666	0.0564224	linear	0.106666	False	False
cg03550821	8.2878e-06	0.219207	6.04231e-05	linear	0.219207	True	False
cg02375409	0.752906	-0.0156711	0.804726	linear	0.0156711	False	False
cg20556598	0.796129	0.0128613	0.84078	linear	0.0128613	False	False
cg13049881	0.118078	-0.0776874	0.173481	linear	0.0776874	False	False
cg16226866	0.0001926	-0.184028	0.00079374	linear	0.184028	True	False
cg16086416	3.47435e-10	0.304962	1.33916e-08	linear	0.304962	True	False
cg13447295	0.54231	0.0303268	0.61963	linear	0.0303268	False	False
cg25845890	0.057371	-0.0943993	0.0938333	linear	0.0943993	False	False
cg15609678	0.00570358	0.136968	0.0131844	linear	0.136968	True	False
cg04440885	0.0433135	0.100341	0.0737508	linear	0.100341	False	False
cg21997857	0.600333	0.0260778	0.672445	linear	0.0260778	False	False
cg04959196	0.267251	-0.0551876	0.345804	linear	0.0551876	False	False
cg16404157	0.25374	-0.0567717	0.331095	linear	0.0567717	False	False
cg17815841	0.0860109	-0.0853123	0.132472	linear	0.0853123	False	False
cg22837321	0.188468	-0.0654002	0.257892	linear	0.0654002	False	False
cg15890292	0.00505489	-0.138889	0.0119118	linear	0.138889	True	False
cg10503854	0.0186098	-0.11675	0.0359068	linear	0.11675	True	False
cg01163837	0.145683	-0.0723363	0.207437	linear	0.0723363	False	False
cg14871544	0.0287651	0.108538	0.0520043	linear	0.108538	False	False
cg04891328	0.00610447	0.135876	0.0139708	linear	0.135876	True	False
cg22037077	0.262697	-0.0557152	0.340893	linear	0.0557152	False	False
cg10400362	0.220798	-0.0608977	0.29461	linear	0.0608977	False	False
cg02827007	3.07305e-06	0.229181	2.66875e-05	linear	0.229181	True	False
cg13502382	3.85857e-05	0.202763	0.000213387	linear	0.202763	True	False
cg20229989	0.0019168	0.15355	0.00527543	linear	0.15355	True	False
cg07019386	0.065138	0.0916214	0.104551	linear	0.0916214	False	False
cg13864549	0.000379728	0.175541	0.00138261	linear	0.175541	True	False
cg20388165	0.00382316	0.143248	0.00941679	linear	0.143248	True	False
cg21836487	0.116742	0.07797	0.1718	linear	0.07797	False	False
cg10842126	0.000117515	0.189977	0.000530205	linear	0.189977	True	False
cg01774335	0.00827542	0.130891	0.0180672	linear	0.130891	True	False
cg23837289	5.26302e-05	0.19928	0.000274985	linear	0.19928	True	False
cg10708548	0.953234	-0.00291952	0.964904	linear	0.00291952	False	False
cg26185859	0.00164823	0.155721	0.00465064	linear	0.155721	True	False
cg18713687	0.0290869	0.108321	0.0525014	linear	0.108321	False	False
cg08847724	0.000752272	-0.166583	0.00242753	linear	0.166583	True	False
cg16049598	0.161461	0.0696198	0.226384	linear	0.0696198	False	False
cg10207745	1.80254e-07	0.255474	2.52159e-06	linear	0.255474	True	False
cg13190493	0.00349002	-0.144646	0.00871733	linear	0.144646	True	False
cg05177544	0.000496367	0.172083	0.00172299	linear	0.172083	True	False
cg20203466	0.383992	-0.0433187	0.467288	linear	0.0433187	False	False
cg22603960	0.163598	-0.0692676	0.228928	linear	0.0692676	False	False
cg02608491	4.19458e-09	0.28639	1.07408e-07	linear	0.28639	True	False
cg05955831	0.0345826	0.104911	0.0608647	linear	0.104911	False	False
cg13077865	0.00283057	0.147812	0.00730854	linear	0.147812	True	False
cg23162343	2.60224e-05	-0.207099	0.000154817	linear	0.207099	True	False
cg13621836	0.00171627	0.155142	0.00480914	linear	0.155142	True	False
cg06271561	0.000332073	0.177248	0.00123876	linear	0.177248	True	False
cg03096488	0.874992	-0.00783174	0.90441	linear	0.00783174	False	False
cg26094990	0.0269682	0.109785	0.049226	linear	0.109785	True	False
cg04327529	0.000108264	-0.190947	0.000495755	linear	0.190947	True	False
cg26698819	0.00227839	0.15103	0.0060947	linear	0.15103	True	False
cg26297493	0.040921	-0.101509	0.0702666	linear	0.101509	False	False
cg21177165	0.015949	-0.11955	0.0314784	linear	0.11955	True	False
cg01574912	0.0900743	-0.0842319	0.137818	linear	0.0842319	False	False
cg22935207	0.101538	-0.0813811	0.152581	linear	0.0813811	False	False
cg25736986	3.85673e-05	-0.202768	0.000213298	linear	0.202768	True	False
cg01013171	0.073917	0.0887921	0.116443	linear	0.0887921	False	False
cg27330757	0.170771	-0.0681096	0.237383	linear	0.0681096	False	False
cg01421380	0.356245	-0.0459025	0.439232	linear	0.0459025	False	False
cg14769373	0.0371906	0.103452	0.0647595	linear	0.103452	False	False
cg01113910	0.0831766	-0.0860905	0.128767	linear	0.0860905	False	False
cg11952908	0.000155684	0.186613	0.000666713	linear	0.186613	True	False
cg17367836	0.985982	-0.000874695	0.989696	linear	0.000874695	False	False
cg08033127	0.278385	0.0539229	0.35776	linear	0.0539229	False	False
cg13022679	0.171746	0.0679551	0.238512	linear	0.0679551	False	False
cg09999673	1.75601e-06	0.234614	1.67957e-05	linear	0.234614	True	False
cg24309215	0.186009	0.0657652	0.255053	linear	0.0657652	False	False
cg07376033	0.0562312	0.0948327	0.0922295	linear	0.0948327	False	False
cg12178465	3.55361e-08	0.269302	6.46286e-07	linear	0.269302	True	False
cg12663811	0.0901805	0.0842042	0.137956	linear	0.0842042	False	False
cg05784171	0.368462	0.04475	0.451689	linear	0.04475	False	False
cg01692639	0.841072	0.00998228	0.877329	linear	0.00998228	False	False
cg01403246	0.922127	-0.00486649	0.940932	linear	0.00486649	False	False
cg12150538	3.524e-09	0.287733	9.28773e-08	linear	0.287733	True	False
cg01880648	0.833157	-0.0104866	0.870888	linear	0.0104866	False	False
cg10761315	0.0228941	-0.112903	0.0428302	linear	0.112903	True	False
cg08639121	0.000161603	-0.186162	0.000687345	linear	0.186162	True	False
cg11949874	0.000141689	0.187746	0.000617439	linear	0.187746	True	False
cg24725692	0.921656	-0.00489602	0.940579	linear	0.00489602	False	False
cg12794131	0.000188567	0.184287	0.000779877	linear	0.184287	True	False
cg20329620	0.583913	0.0272598	0.657526	linear	0.0272598	False	False
cg12205729	0.201155	0.0635713	0.272382	linear	0.0635713	False	False
cg04003920	5.14152e-07	0.246102	6.03512e-06	linear	0.246102	True	False
cg24261177	0.00100713	-0.162621	0.0030877	linear	0.162621	True	False
cg18207699	2.13943e-05	0.209221	0.000131912	linear	0.209221	True	False
cg08876470	0.00450518	-0.1407	0.0108154	linear	0.1407	True	False
cg19802378	0.00165795	0.155637	0.00467375	linear	0.155637	True	False
cg02824793	5.84614e-05	0.198087	0.000299707	linear	0.198087	True	False
cg10284662	0.129805	0.0753072	0.18804	linear	0.0753072	False	False
cg23510764	0.180234	0.0666364	0.248367	linear	0.0666364	False	False
cg13460858	0.341629	0.0473144	0.424271	linear	0.0473144	False	False
cg15463803	0.00686766	0.133965	0.0154358	linear	0.133965	True	False
cg27235829	1.99691e-06	0.233378	1.86996e-05	linear	0.233378	True	False
cg11461670	0.00052298	-0.171402	0.00179804	linear	0.171402	True	False
cg03388172	0.000389079	-0.17523	0.00141071	linear	0.17523	True	False
cg21123505	0.0700607	0.0899991	0.111213	linear	0.0899991	False	False
cg25353752	6.04011e-06	0.222437	4.65592e-05	linear	0.222437	True	False
cg23745644	0.734129	-0.0169069	0.788921	linear	0.0169069	False	False
cg13801946	0.0072445	-0.133091	0.0161454	linear	0.133091	True	False
cg01994243	7.95977e-12	0.330842	5.73008e-10	linear	0.330842	True	False
cg10730078	7.69219e-05	0.194939	0.000375528	linear	0.194939	True	False
cg05242416	0.681426	0.0204345	0.743991	linear	0.0204345	False	False
cg10037972	0.00508405	0.138798	0.0119707	linear	0.138798	True	False
cg23703633	0.276701	0.0541119	0.355959	linear	0.0541119	False	False
cg14073922	0.53004	-0.0312531	0.608295	linear	0.0312531	False	False
cg27408541	0.106008	-0.0803384	0.158289	linear	0.0803384	False	False
cg18329739	0.137139	0.0739021	0.197027	linear	0.0739021	False	False
cg02721184	0.47764	0.0353398	0.558787	linear	0.0353398	False	False
cg01998785	0.901297	0.00617415	0.92506	linear	0.00617415	False	False
cg05929574	0.131814	-0.0749164	0.190475	linear	0.0749164	False	False
cg27489994	0.007248	-0.133083	0.0161515	linear	0.133083	True	False
cg02122376	0.000225805	-0.182074	0.000902696	linear	0.182074	True	False
cg25354657	0.903007	-0.00606661	0.926401	linear	0.00606661	False	False
cg08779783	0.648476	-0.022692	0.715037	linear	0.022692	False	False
cg03000156	0.00406495	-0.142301	0.00991766	linear	0.142301	True	False
cg23746148	3.07881e-07	0.250734	3.94407e-06	linear	0.250734	True	False
cg05042743	0.979315	0.00129077	0.984787	linear	0.00129077	False	False
cg04983296	0.0709095	0.0897289	0.112363	linear	0.0897289	False	False
cg27058988	0.995215	0.000298544	0.996582	linear	0.000298544	False	False
cg03026373	0.0080461	-0.131358	0.0176476	linear	0.131358	True	False
cg16158077	0.000681209	-0.167911	0.00223493	linear	0.167911	True	False
cg07851808	0.668707	-0.0213007	0.732833	linear	0.0213007	False	False
cg14869949	9.41635e-13	0.344454	9.67921e-11	linear	0.344454	True	False
cg26982161	8.37254e-06	0.219102	6.09331e-05	linear	0.219102	True	False
cg20332195	0.323826	-0.0490872	0.40578	linear	0.0490872	False	False
cg26891598	0.0388539	0.102566	0.0672234	linear	0.102566	False	False
cg04840732	0.000192624	-0.184027	0.000793809	linear	0.184027	True	False
cg04195125	0.0261597	-0.11037	0.0479632	linear	0.11037	True	False
cg13704497	9.49654e-07	0.240435	1.00741e-05	linear	0.240435	True	False
cg00703273	0.08736	-0.0849491	0.134259	linear	0.0849491	False	False
cg09876683	1.233e-09	0.295684	3.86353e-08	linear	0.295684	True	False
cg17362299	0.0537012	0.0958216	0.0886672	linear	0.0958216	False	False
cg00719568	0.000117594	0.189969	0.000530494	linear	0.189969	True	False
cg02729561	0.602098	0.0259516	0.674027	linear	0.0259516	False	False
cg01242619	0.693451	-0.0196212	0.754288	linear	0.0196212	False	False
cg00312009	4.80785e-05	0.200301	0.000255239	linear	0.200301	True	False
cg00151271	0.00592294	0.136362	0.0136138	linear	0.136362	True	False
cg13495574	0.0023817	-0.150378	0.00632387	linear	0.150378	True	False
cg17332245	0.0600054	0.0934241	0.0974842	linear	0.0934241	False	False
cg11612694	0.766184	-0.0148031	0.815859	linear	0.0148031	False	False
cg03770290	0.708721	0.0185959	0.767388	linear	0.0185959	False	False
cg14661400	3.10385e-05	-0.20517	0.000178727	linear	0.20517	True	False
cg03890167	1.36549e-07	-0.257895	1.99636e-06	linear	0.257895	True	False
cg00489539	0.000177452	0.185027	0.000741979	linear	0.185027	True	False
cg12569216	0.000667277	0.168186	0.00219701	linear	0.168186	True	False
cg11994115	0.0331149	0.105774	0.0586451	linear	0.105774	False	False
cg12706396	0.0297175	0.107903	0.0534616	linear	0.107903	False	False
cg05694052	0.0506193	0.0970799	0.0842834	linear	0.0970799	False	False
cg00122944	0.000436271	0.173757	0.001549	linear	0.173757	True	False
cg02712587	0.178399	0.0669174	0.246274	linear	0.0669174	False	False
cg02827643	0.0301257	0.107637	0.0540863	linear	0.107637	False	False
cg04726535	0.0489063	0.0978071	0.0818067	linear	0.0978071	False	False
cg09796094	0.281993	-0.0535205	0.361676	linear	0.0535205	False	False
cg14942906	0.838825	-0.0101253	0.87553	linear	0.0101253	False	False
cg17079788	1.94327e-07	0.254814	2.68609e-06	linear	0.254814	True	False
cg00329697	0.697909	-0.0193211	0.758058	linear	0.0193211	False	False
cg09959428	0.0102483	0.127289	0.0216393	linear	0.127289	True	False
cg21082678	1.32271e-10	0.311822	5.96552e-09	linear	0.311822	True	False
cg09115485	0.0320452	0.106423	0.0570207	linear	0.106423	False	False
cg16636522	0.0142127	0.121606	0.0285499	linear	0.121606	True	False
cg02328930	3.51265e-06	-0.227863	2.98129e-05	linear	0.227863	True	False
cg05635114	6.57046e-06	0.221583	4.99174e-05	linear	0.221583	True	False
cg15543027	5.39273e-10	0.301779	1.93543e-08	linear	0.301779	True	False
cg20918682	0.00493772	0.13926	0.0116784	linear	0.13926	True	False
cg19466178	0.932421	-0.0042215	0.948766	linear	0.0042215	False	False
cg03128534	0.359243	0.0456174	0.442294	linear	0.0456174	False	False
cg06030166	0.580167	-0.0275316	0.654111	linear	0.0275316	False	False
cg09216008	1.06751e-09	0.296757	3.42036e-08	linear	0.296757	True	False
cg05836943	0.649815	-0.0225994	0.716228	linear	0.0225994	False	False
cg24452069	0.209481	0.062416	0.28179	linear	0.062416	False	False
cg06405430	0.0243134	-0.111766	0.0450689	linear	0.111766	True	False
cg08213590	0.000566763	0.170347	0.00192105	linear	0.170347	True	False
cg17942785	0.000123072	0.189428	0.000550275	linear	0.189428	True	False
cg10193091	5.50504e-07	0.245478	6.39517e-06	linear	0.245478	True	False
cg18161036	0.00905628	-0.129382	0.0194956	linear	0.129382	True	False
cg10441983	0.416611	0.0404227	0.499451	linear	0.0404227	False	False
cg07486383	0.00538532	-0.137884	0.0125679	linear	0.137884	True	False
cg22456975	0.739402	0.0165588	0.793334	linear	0.0165588	False	False
cg01961252	0.0405702	-0.101685	0.0697501	linear	0.101685	False	False
cg26182097	0.839755	0.0100661	0.876299	linear	0.0100661	False	False
cg18268041	0.000364733	0.176056	0.00133764	linear	0.176056	True	False
cg23239647	0.0374091	0.103334	0.0650822	linear	0.103334	False	False
cg12103197	0.00132738	0.158787	0.00388497	linear	0.158787	True	False
cg24928333	0.00325511	-0.145706	0.00821877	linear	0.145706	True	False
cg07568841	0.878026	-0.00764016	0.906759	linear	0.00764016	False	False
cg06631868	2.49116e-05	-0.207574	0.000149396	linear	0.207574	True	False
cg04407137	5.04043e-06	0.224263	4.01334e-05	linear	0.224263	True	False
cg14948785	0.929055	0.00443231	0.946207	linear	0.00443231	False	False
cg00451491	0.0772658	-0.0877849	0.120913	linear	0.0877849	False	False
cg08111021	0.0201073	-0.115326	0.0383477	linear	0.115326	True	False
cg25177452	0.0113818	-0.125489	0.0236564	linear	0.125489	True	False
cg16452248	8.57431e-05	0.193679	0.00041039	linear	0.193679	True	False
cg16416603	0.0204927	0.114974	0.0389717	linear	0.114974	True	False
cg12110887	6.58288e-06	0.221563	4.9993e-05	linear	0.221563	True	False
cg18692056	2.35733e-05	0.208173	0.000142825	linear	0.208173	True	False
cg05684145	0.000463993	0.17296	0.00163017	linear	0.17296	True	False
cg19529472	1.52482e-05	-0.212842	9.98305e-05	linear	0.212842	True	False
cg21620953	0.00487017	-0.139477	0.0115464	linear	0.139477	True	False
cg15225594	2.20078e-08	0.273237	4.32494e-07	linear	0.273237	True	False
cg17176195	0.00324996	-0.14573	0.00820819	linear	0.14573	True	False
cg22725222	0.677015	0.0207342	0.740175	linear	0.0207342	False	False
cg07122893	0.16125	-0.0696548	0.226124	linear	0.0696548	False	False
cg18113181	0.0121924	0.124297	0.0250789	linear	0.124297	True	False
cg15515320	4.5986e-11	0.31913	2.47478e-09	linear	0.31913	True	False
cg25456593	0.257196	0.0563611	0.3349	linear	0.0563611	False	False
cg02951568	0.958426	-0.00259509	0.968928	linear	0.00259509	False	False
cg03460534	0.823879	0.0110792	0.863366	linear	0.0110792	False	False
cg07811634	6.57103e-09	0.282895	1.56396e-07	linear	0.282895	True	False
cg24420089	0.00083162	0.165231	0.00263665	linear	0.165231	True	False
cg01381829	0.518482	0.0321357	0.597399	linear	0.0321357	False	False
cg18157027	0.428973	-0.0393604	0.511591	linear	0.0393604	False	False
cg19168507	0.859303	0.00882439	0.891975	linear	0.00882439	False	False
cg02921623	7.42562e-05	0.195346	0.000364654	linear	0.195346	True	False
cg06023661	0.0332682	0.105682	0.0588835	linear	0.105682	False	False
cg06824181	0.419784	0.0401482	0.502523	linear	0.0401482	False	False
cg10775229	0.0157644	-0.119759	0.0311668	linear	0.119759	True	False
cg22088248	0.877767	0.00765651	0.906545	linear	0.00765651	False	False
cg00488691	0.774632	-0.0142531	0.822923	linear	0.0142531	False	False
cg00441434	0.201275	-0.0635543	0.272518	linear	0.0635543	False	False
cg27271486	0.148242	0.071881	0.210557	linear	0.071881	False	False
cg05823577	5.89448e-05	0.197994	0.000301713	linear	0.197994	True	False
cg17773000	0.000347986	-0.176654	0.00128702	linear	0.176654	True	False
cg04731091	0.000988245	-0.16288	0.00303931	linear	0.16288	True	False
cg04493000	0.014572	-0.121163	0.0291533	linear	0.121163	True	False
cg05011258	2.76359e-06	0.230222	2.44675e-05	linear	0.230222	True	False
cg17416233	0.000516448	0.171566	0.00177974	linear	0.171566	True	False
cg02294791	6.81814e-05	0.196329	0.000339946	linear	0.196329	True	False
cg08270913	0.0291948	-0.108249	0.0526651	linear	0.108249	False	False
cg05652547	0.775895	0.0141711	0.823964	linear	0.0141711	False	False
cg00351838	0.0244861	-0.111632	0.0453374	linear	0.111632	True	False
cg00226831	5.46922e-06	0.223441	4.28995e-05	linear	0.223441	True	False
cg19244826	0.0632645	-0.0922654	0.102002	linear	0.0922654	False	False
cg14847483	0.0139118	0.121985	0.0280413	linear	0.121985	True	False
cg25503695	2.18809e-06	0.232494	2.01757e-05	linear	0.232494	True	False
cg15756319	0.453222	-0.0373267	0.535316	linear	0.0373267	False	False
cg07322981	0.0111167	-0.125895	0.0231887	linear	0.125895	True	False
cg10916998	0.0881222	0.0847459	0.135265	linear	0.0847459	False	False
cg03533590	0.000763892	0.166377	0.00245836	linear	0.166377	True	False
cg00064778	0.324631	0.0490058	0.406642	linear	0.0490058	False	False
cg03611452	0.104506	-0.0806848	0.156369	linear	0.0806848	False	False
cg26339924	0.00041628	0.174362	0.0014906	linear	0.174362	True	False
cg25631853	3.28973e-07	0.25014	4.16755e-06	linear	0.25014	True	False
cg20646950	0.0830734	-0.0861192	0.128631	linear	0.0861192	False	False
cg07390013	0.197565	-0.06408	0.268305	linear	0.06408	False	False
cg10153031	0.00153511	-0.156734	0.00438559	linear	0.156734	True	False
cg13790837	7.06238e-08	0.263549	1.14871e-06	linear	0.263549	True	False
cg15145985	0.00350121	0.144597	0.00874054	linear	0.144597	True	False
cg16172923	0.556841	-0.029243	0.63303	linear	0.029243	False	False
cg04496250	0.0283115	0.108846	0.0513033	linear	0.108846	False	False
cg06692785	0.00110161	-0.161385	0.00332818	linear	0.161385	True	False
cg22866749	0.0952233	0.0829176	0.14452	linear	0.0829176	False	False
cg26539941	0.522158	-0.0318539	0.60091	linear	0.0318539	False	False
cg13540060	2.13006e-07	0.254006	2.89851e-06	linear	0.254006	True	False
cg01180441	0.0134044	0.122639	0.0271659	linear	0.122639	True	False
cg11005651	1.63988e-08	0.275622	3.37737e-07	linear	0.275622	True	False
cg23695211	0.301954	-0.0513543	0.382798	linear	0.0513543	False	False
cg02365517	0.000126317	0.189118	0.000562031	linear	0.189118	True	False
cg24312843	0.0617262	-0.092806	0.0998709	linear	0.092806	False	False
cg06621659	0.187044	-0.0656112	0.256229	linear	0.0656112	False	False
cg12373573	0.748631	-0.0159516	0.801113	linear	0.0159516	False	False
cg16873863	1.23031e-06	0.238002	1.24736e-05	linear	0.238002	True	False
cg15819410	0.334262	0.0480406	0.41659	linear	0.0480406	False	False
cg17485549	0.000352433	0.176493	0.00130043	linear	0.176493	True	False
cg05499376	0.940213	-0.00373381	0.954718	linear	0.00373381	False	False
cg10780318	0.00021864	-0.182472	0.000879631	linear	0.182472	True	False
cg24160158	0.0389426	-0.10252	0.0673531	linear	0.10252	False	False
cg14521987	0.00232116	0.150757	0.00618943	linear	0.150757	True	False
cg03253114	0.0137824	-0.12215	0.0278193	linear	0.12215	True	False
cg18251360	0.0216431	-0.113957	0.0408205	linear	0.113957	True	False
cg02751731	0.00166208	0.155601	0.00468319	linear	0.155601	True	False
cg09635768	0.000215251	-0.182664	0.000868474	linear	0.182664	True	False
cg15768203	0.00154981	0.156598	0.00442048	linear	0.156598	True	False
cg00820340	0.000352192	-0.176502	0.00129974	linear	0.176502	True	False
cg17551192	0.861198	0.00870429	0.893472	linear	0.00870429	False	False
cg03076324	0.0561388	-0.0948682	0.0920988	linear	0.0948682	False	False
cg22777952	0.0984341	0.0821265	0.148631	linear	0.0821265	False	False
cg08367465	0.000853246	0.164883	0.0026928	linear	0.164883	True	False
cg17214023	0.133305	-0.0746292	0.192319	linear	0.0746292	False	False
cg12420948	0.00938215	0.128787	0.0200855	linear	0.128787	True	False
cg09101258	3.39193e-08	0.269687	6.21845e-07	linear	0.269687	True	False
cg01639892	0.231828	0.0594706	0.306948	linear	0.0594706	False	False
cg07395354	0.0382294	-0.102895	0.0663009	linear	0.102895	False	False
cg18375441	0.00825842	-0.130925	0.018036	linear	0.130925	True	False
cg05876246	4.16258e-08	-0.267989	7.38692e-07	linear	0.267989	True	False
cg01273802	0.0412655	0.101337	0.0707744	linear	0.101337	False	False
cg27308707	0.265626	-0.0553751	0.344085	linear	0.0553751	False	False
cg24688413	0.000369111	0.175904	0.00135062	linear	0.175904	True	False
cg09334331	0.7906	0.0132183	0.836181	linear	0.0132183	False	False
cg25004071	0.373724	0.0442609	0.456981	linear	0.0442609	False	False
cg18304766	0.172254	0.0678747	0.239102	linear	0.0678747	False	False
cg01070065	0.0534431	0.0959246	0.0883027	linear	0.0959246	False	False
cg08658851	0.00147049	0.157344	0.00423102	linear	0.157344	True	False
cg06531158	0.534625	-0.0309057	0.612567	linear	0.0309057	False	False
cg26826207	0.0045861	0.140422	0.0109794	linear	0.140422	True	False
cg21353144	0.0220039	0.113648	0.041405	linear	0.113648	True	False
cg01934797	0.0436331	0.100189	0.0742157	linear	0.100189	False	False
cg15345126	0.0102389	-0.127304	0.0216229	linear	0.127304	True	False
cg00214294	0.00407266	-0.142272	0.00993369	linear	0.142272	True	False
cg19767477	0.792104	0.0131211	0.837426	linear	0.0131211	False	False
cg15656834	0.0587264	0.093893	0.0957139	linear	0.093893	False	False
cg27272547	0.182976	0.0662202	0.251525	linear	0.0662202	False	False
cg10623219	0.0181515	-0.117207	0.0351523	linear	0.117207	True	False
cg13120771	0.128798	0.0755049	0.186779	linear	0.0755049	False	False
cg10276171	0.00186787	0.153924	0.00516304	linear	0.153924	True	False
cg15678744	1.37262e-05	0.213953	9.16072e-05	linear	0.213953	True	False
cg15701412	0.985278	-0.000918604	0.989177	linear	0.000918604	False	False
cg04765955	5.23395e-05	0.199343	0.000273688	linear	0.199343	True	False
cg24751836	0.422621	-0.0399039	0.505334	linear	0.0399039	False	False
cg03538833	0.296523	0.0519339	0.377062	linear	0.0519339	False	False
cg15853329	0.408394	0.041139	0.491451	linear	0.041139	False	False
cg24027596	0.447487	0.0378019	0.529696	linear	0.0378019	False	False
cg00049382	0.00246391	0.149877	0.00650618	linear	0.149877	True	False
cg14693961	0.235622	-0.0589908	0.311126	linear	0.0589908	False	False
cg16714096	6.26906e-12	-0.332398	4.69269e-10	linear	0.332398	True	False
cg11423909	0.784199	-0.0136324	0.830901	linear	0.0136324	False	False
cg03908908	0.96021	0.00248362	0.970277	linear	0.00248362	False	False
cg03198116	0.012717	0.123563	0.0259852	linear	0.123563	True	False
cg16449001	0.0223282	-0.113373	0.0419256	linear	0.113373	True	False
cg26304088	0.189163	0.0652978	0.258713	linear	0.0652978	False	False
cg19621179	0.196721	0.0642006	0.267368	linear	0.0642006	False	False
cg25204955	0.420355	-0.040099	0.503057	linear	0.040099	False	False
cg10692467	0.232063	-0.0594407	0.30721	linear	0.0594407	False	False
cg06930464	1.00464e-06	0.239909	1.0556e-05	linear	0.239909	True	False
cg07110010	2.06008e-11	0.324555	1.26509e-09	linear	0.324555	True	False
cg13200847	0.000560789	0.170486	0.00190428	linear	0.170486	True	False
cg13663190	0.657986	-0.0220359	0.723406	linear	0.0220359	False	False
cg03291430	0.0178908	-0.11747	0.0347168	linear	0.11747	True	False
cg00039044	0.136319	-0.0740564	0.196026	linear	0.0740564	False	False
cg04530460	0.572126	0.0281178	0.646928	linear	0.0281178	False	False
cg18508425	6.12772e-06	0.222291	4.71098e-05	linear	0.222291	True	False
cg26877588	0.127051	0.0758506	0.184654	linear	0.0758506	False	False
cg01719079	2.7081e-08	0.271541	5.15623e-07	linear	0.271541	True	False
cg06085579	0.000319494	0.177737	0.00119981	linear	0.177737	True	False
cg07180219	0.00142943	0.157744	0.00413102	linear	0.157744	True	False
cg07145366	0.000273933	-0.179672	0.00105722	linear	0.179672	True	False
cg09418321	0.400457	0.0418392	0.483691	linear	0.0418392	False	False
cg23924082	8.49802e-06	0.218949	6.16555e-05	linear	0.218949	True	False
cg05419812	0.000630618	0.168937	0.00209733	linear	0.168937	True	False
cg13848035	0.851106	0.00934435	0.885467	linear	0.00934435	False	False
cg01985482	1.02357e-07	0.260383	1.56901e-06	linear	0.260383	True	False
cg26335459	0.40081	-0.0418078	0.484036	linear	0.0418078	False	False
cg04291891	0.00439174	0.141099	0.0105862	linear	0.141099	True	False
cg21070161	0.00583354	-0.136607	0.013439	linear	0.136607	True	False
cg04273474	0.151001	0.0713968	0.213835	linear	0.0713968	False	False
cg22720139	6.0848e-09	0.283497	1.46591e-07	linear	0.283497	True	False
cg09147065	0.00994306	0.127803	0.021093	linear	0.127803	True	False
cg11649654	0.00399048	-0.142587	0.00976291	linear	0.142587	True	False
cg27497928	4.27292e-06	0.225917	3.50242e-05	linear	0.225917	True	False
cg23732978	0.566729	0.0285134	0.642019	linear	0.0285134	False	False
cg12088387	0.000235747	-0.181541	0.000934739	linear	0.181541	True	False
cg00798206	0.000451861	-0.173304	0.00159476	linear	0.173304	True	False
cg01048834	2.4766e-05	-0.207637	0.000148695	linear	0.207637	True	False
cg14739500	0.0010637	0.161868	0.00323253	linear	0.161868	True	False
cg03032798	0.137421	0.0738493	0.197379	linear	0.0738493	False	False
cg07695771	0.522557	-0.0318234	0.601279	linear	0.0318234	False	False
cg03509898	0.000818346	0.165449	0.00260218	linear	0.165449	True	False
cg06613765	0.452489	0.0373873	0.53456	linear	0.0373873	False	False
cg24216220	0.134502	-0.0744006	0.19379	linear	0.0744006	False	False
cg06601993	0.762643	-0.0150341	0.812921	linear	0.0150341	False	False
cg25018062	0.00189311	-0.15373	0.00522084	linear	0.15373	True	False
cg20716945	0.00422785	-0.141691	0.0102522	linear	0.141691	True	False
cg10888242	1.29957e-08	0.277492	2.77821e-07	linear	0.277492	True	False
cg00999152	0.0481016	0.0981562	0.0806565	linear	0.0981562	False	False
cg27032184	0.0266189	0.110036	0.0486799	linear	0.110036	True	False
cg07693974	1.27661e-06	-0.237652	1.28644e-05	linear	0.237652	True	False
cg00361992	0.0148583	0.120817	0.0296452	linear	0.120817	True	False
cg09219093	0.0851965	-0.0855338	0.131405	linear	0.0855338	False	False
cg25734928	1.33195e-09	0.295108	4.12462e-08	linear	0.295108	True	False
cg09720205	0.305447	0.0509852	0.386497	linear	0.0509852	False	False
cg17889402	0.0446734	-0.0997003	0.0757204	linear	0.0997003	False	False
cg04543901	0.152064	0.0712121	0.215105	linear	0.0712121	False	False
cg27046940	0.509822	0.0328037	0.589268	linear	0.0328037	False	False
cg17484976	0.0797889	0.0870492	0.124282	linear	0.0870492	False	False
cg12046677	0.000501012	0.171962	0.00173607	linear	0.171962	True	False
cg21680208	0.0789206	0.0873002	0.123113	linear	0.0873002	False	False
cg00255811	0.194739	-0.0644853	0.265108	linear	0.0644853	False	False
cg27553971	2.35725e-06	0.231772	2.14598e-05	linear	0.231772	True	False
cg19302441	0.000222245	0.18227	0.000891291	linear	0.18227	True	False
cg07620844	1.06653e-12	0.343677	1.07093e-10	linear	0.343677	True	False
cg14201956	0.164882	-0.0690575	0.230455	linear	0.0690575	False	False
cg04317076	0.00583512	-0.136602	0.0134421	linear	0.136602	True	False
cg05840612	0.954138	0.00286305	0.965599	linear	0.00286305	False	False
cg27123665	0.000384602	-0.175378	0.00139728	linear	0.175378	True	False
cg02134790	1.41322e-08	0.27682	2.97847e-07	linear	0.27682	True	False
cg07047280	3.47802e-06	0.227961	2.95744e-05	linear	0.227961	True	False
cg18442362	0.779655	-0.013927	0.827042	linear	0.013927	False	False
cg25784872	0.116905	-0.0779353	0.171995	linear	0.0779353	False	False
cg04488174	0.000303677	0.178378	0.00115109	linear	0.178378	True	False
cg02236673	3.14322e-07	0.250548	4.01173e-06	linear	0.250548	True	False
cg26894484	0.350482	0.0464547	0.433312	linear	0.0464547	False	False
cg27319123	0.731814	0.01706	0.786873	linear	0.01706	False	False
cg08626646	0.539212	-0.0305597	0.616821	linear	0.0305597	False	False
cg09391032	0.700319	-0.0191591	0.760164	linear	0.0191591	False	False
cg13289869	0.960271	-0.00247984	0.970324	linear	0.00247984	False	False
cg12007192	0.260907	-0.0559243	0.338955	linear	0.0559243	False	False
cg06824318	0.0110675	-0.125972	0.0231015	linear	0.125972	True	False
cg12222277	0.0845583	0.0857085	0.130574	linear	0.0857085	False	False
cg26034811	4.61404e-08	0.267131	8.05789e-07	linear	0.267131	True	False
cg07592828	5.61419e-08	0.265487	9.48618e-07	linear	0.265487	True	False
cg09697245	0.102638	0.0811211	0.154009	linear	0.0811211	False	False
cg23649129	0.0332902	0.105669	0.0589146	linear	0.105669	False	False
cg18115215	0.0196593	-0.115742	0.0376135	linear	0.115742	True	False
cg06931418	0.71265	0.0183334	0.770733	linear	0.0183334	False	False
cg22607793	0.000109591	0.190803	0.000500685	linear	0.190803	True	False
cg25348532	0.000474854	-0.17266	0.0016615	linear	0.17266	True	False
cg15280363	0.00322536	0.145845	0.00815618	linear	0.145845	True	False
cg20657098	0.0068234	0.134071	0.0153518	linear	0.134071	True	False
cg05228284	0.0194305	-0.115958	0.0372482	linear	0.115958	True	False
cg19075839	0.704873	-0.0188535	0.764061	linear	0.0188535	False	False
cg17946713	7.90164e-06	-0.219697	5.80856e-05	linear	0.219697	True	False
cg20251241	1.47654e-08	0.276468	3.0924e-07	linear	0.276468	True	False
cg21091226	2.38481e-05	0.208047	0.000144178	linear	0.208047	True	False
cg07972954	0.145303	0.0724046	0.206983	linear	0.0724046	False	False
cg01076997	0.793969	0.0130007	0.839006	linear	0.0130007	False	False
cg11619549	0.216847	0.0614214	0.2901	linear	0.0614214	False	False
cg14293473	0.000887358	0.164351	0.00278103	linear	0.164351	True	False
cg14548882	0.131052	0.075064	0.189555	linear	0.075064	False	False
cg19851137	0.000508947	-0.171757	0.0017582	linear	0.171757	True	False
cg07960762	0.265007	-0.0554467	0.343431	linear	0.0554467	False	False
cg11822372	0.0836424	-0.0859611	0.129381	linear	0.0859611	False	False
cg11013365	0.000234173	-0.181624	0.000929684	linear	0.181624	True	False
cg02955504	4.34997e-07	0.247622	5.25121e-06	linear	0.247622	True	False
cg26772854	0.579654	0.0275689	0.653673	linear	0.0275689	False	False
cg09816018	2.4983e-10	0.307324	1.01532e-08	linear	0.307324	True	False
cg06654127	0.00330566	0.145472	0.00832629	linear	0.145472	True	False
cg26805129	0.448914	0.0376834	0.531068	linear	0.0376834	False	False
cg15146004	0.0278842	0.10914	0.0506491	linear	0.10914	False	False
cg08610326	0.257542	0.0563202	0.335282	linear	0.0563202	False	False
cg21211038	0.806091	-0.0122198	0.848936	linear	0.0122198	False	False
cg10069353	0.94489	-0.00344122	0.958338	linear	0.00344122	False	False
cg21877355	2.41196e-05	0.207924	0.0001455	linear	0.207924	True	False
cg17411681	0.00278222	-0.14807	0.00720452	linear	0.14807	True	False
cg14096569	4.82172e-05	0.200269	0.000255835	linear	0.200269	True	False
cg04807561	0.000166012	0.185836	0.000702773	linear	0.185836	True	False
cg00760272	0.0317519	0.106604	0.0565763	linear	0.106604	False	False
cg14728276	0.00272371	-0.148387	0.00707624	linear	0.148387	True	False
cg10512472	0.241519	0.0582559	0.31767	linear	0.0582559	False	False
cg27418434	0.685226	-0.020177	0.747243	linear	0.020177	False	False
cg09682213	2.51703e-06	0.231134	2.2648e-05	linear	0.231134	True	False
cg00394823	0.290733	0.0525598	0.370926	linear	0.0525598	False	False
cg27424853	0.00136874	0.158356	0.00398454	linear	0.158356	True	False
cg27223646	0.150932	-0.0714088	0.213753	linear	0.0714088	False	False
cg13561409	0.343303	-0.0471507	0.425948	linear	0.0471507	False	False
cg07011180	5.26788e-05	0.19927	0.000275176	linear	0.19927	True	False
cg25140419	0.00661371	-0.134579	0.014951	linear	0.134579	True	False
cg17741291	3.68434e-06	-0.227391	3.1004e-05	linear	0.227391	True	False
cg18195765	0.00445331	0.140881	0.0107111	linear	0.140881	True	False
cg20337057	0.00060709	0.16944	0.00203305	linear	0.16944	True	False
cg27563952	0.000823567	-0.165363	0.00261565	linear	0.165363	True	False
cg21973914	0.000328204	0.177397	0.00122654	linear	0.177397	True	False
cg16409955	0.00053522	-0.171099	0.00183207	linear	0.171099	True	False
cg19615059	0.0338131	-0.105359	0.05971	linear	0.105359	False	False
cg01162920	4.19198e-11	-0.319761	2.28647e-09	linear	0.319761	True	False
cg17206420	0.00389406	0.142965	0.00956409	linear	0.142965	True	False
cg02808773	1.20752e-05	0.2153	8.24421e-05	linear	0.2153	True	False
cg13812937	2.59553e-12	0.338071	2.25694e-10	linear	0.338071	True	False
cg23714660	0.0609257	-0.0930917	0.0987653	linear	0.0930917	False	False
cg10521706	0.0394392	0.102262	0.0680771	linear	0.102262	False	False
cg13042596	0.0058427	0.136581	0.0134561	linear	0.136581	True	False
cg11820818	0.792968	-0.0130653	0.838161	linear	0.0130653	False	False
cg08447589	0.569604	0.0283025	0.644646	linear	0.0283025	False	False
cg23470017	0.128921	-0.0754806	0.186942	linear	0.0754806	False	False
cg04365123	0.247207	0.0575588	0.323944	linear	0.0575588	False	False
cg11563844	0.412776	0.040756	0.495753	linear	0.040756	False	False
cg01588475	0.0135369	0.122466	0.0273964	linear	0.122466	True	False
cg19722382	7.1556e-10	0.29971	2.45247e-08	linear	0.29971	True	False
cg04985146	0.925189	-0.00467456	0.943306	linear	0.00467456	False	False
cg11676325	0.128059	-0.0756507	0.185871	linear	0.0756507	False	False
cg13915752	0.0357051	0.104272	0.0625412	linear	0.104272	False	False
cg09144709	0.29948	-0.0516175	0.380189	linear	0.0516175	False	False
cg19676671	1.80474e-05	0.211048	0.000114696	linear	0.211048	True	False
cg11212589	0.00537033	-0.137929	0.0125384	linear	0.137929	True	False
cg04806942	0.362527	-0.0453069	0.445611	linear	0.0453069	False	False
cg10615592	0.26371	-0.0555973	0.342014	linear	0.0555973	False	False
cg04073204	0.00459559	0.140389	0.0109985	linear	0.140389	True	False
cg08766283	3.1152e-06	-0.229047	2.6992e-05	linear	0.229047	True	False
cg20808145	0.000292767	-0.178838	0.00111681	linear	0.178838	True	False
cg14248017	0.39011	-0.0427646	0.473439	linear	0.0427646	False	False
cg21383151	0.965672	-0.00214251	0.974461	linear	0.00214251	False	False
cg06890152	0.110022	0.0794317	0.163408	linear	0.0794317	False	False
cg22845790	0.0208477	-0.114655	0.0395505	linear	0.114655	True	False
cg04245097	2.71907e-10	0.30672	1.09067e-08	linear	0.30672	True	False
cg07351262	0.00060192	-0.169554	0.00201882	linear	0.169554	True	False
cg08909806	1.32296e-09	-0.295159	4.10196e-08	linear	0.295159	True	False
cg00929050	0.346833	-0.0468073	0.429573	linear	0.0468073	False	False
cg20899382	0.00386712	-0.143072	0.00950745	linear	0.143072	True	False
cg01802294	8.78892e-06	0.218602	6.33888e-05	linear	0.218602	True	False
cg15692687	0.243452	0.0580177	0.319826	linear	0.0580177	False	False
cg01632497	0.0795165	-0.0871277	0.123912	linear	0.0871277	False	False
cg04300553	0.0114974	-0.125315	0.0238602	linear	0.125315	True	False
cg18807929	0.773105	-0.0143524	0.821674	linear	0.0143524	False	False
cg13512987	0.690279	0.0198352	0.75158	linear	0.0198352	False	False
cg25196575	0.114069	0.0785433	0.168493	linear	0.0785433	False	False
cg16784174	0.0136344	0.12234	0.0275641	linear	0.12234	True	False
cg19227511	0.727303	0.0173587	0.783057	linear	0.0173587	False	False
cg07383092	0.08744	-0.0849277	0.134367	linear	0.0849277	False	False
cg06176750	0.195155	0.0644253	0.265579	linear	0.0644253	False	False
cg23873941	0.472829	0.0357268	0.554161	linear	0.0357268	False	False
cg08051602	3.51289e-06	-0.227862	2.98136e-05	linear	0.227862	True	False
cg05393484	0.0294055	0.108109	0.0529925	linear	0.108109	False	False
cg10492801	0.300758	-0.0514814	0.381542	linear	0.0514814	False	False
cg03362549	0.00997478	-0.127749	0.0211491	linear	0.127749	True	False
cg01239112	0.274964	0.0543078	0.354125	linear	0.0543078	False	False
cg00407944	0.106336	0.0802634	0.158707	linear	0.0802634	False	False
cg17055513	0.000668771	0.168157	0.00220128	linear	0.168157	True	False
cg04239994	0.0394896	-0.102236	0.068151	linear	0.102236	False	False
cg27018185	0.529778	-0.031273	0.608048	linear	0.031273	False	False
cg23153626	0.468361	0.0360881	0.549919	linear	0.0360881	False	False
cg04371779	0.00123281	-0.159822	0.00365395	linear	0.159822	True	False
cg00281967	0.000530367	-0.171218	0.00181848	linear	0.171218	True	False
cg19995595	0.00341825	0.144962	0.00856614	linear	0.144962	True	False
cg11380830	0.584138	-0.0272435	0.657731	linear	0.0272435	False	False
cg09113440	0.00342426	0.144936	0.00857897	linear	0.144936	True	False
cg26670245	0.141376	-0.0731166	0.202193	linear	0.0731166	False	False
cg08311689	0.203397	0.0632567	0.274905	linear	0.0632567	False	False
cg01334432	7.55226e-06	0.220161	5.595e-05	linear	0.220161	True	False
cg12846190	1.97652e-05	0.210074	0.0001236	linear	0.210074	True	False
cg25408497	0.494015	-0.0340383	0.574327	linear	0.0340383	False	False
cg25660358	0.430436	-0.0392358	0.513041	linear	0.0392358	False	False
cg21915672	0.356433	0.0458845	0.439426	linear	0.0458845	False	False
cg06095093	0.0176305	0.117737	0.0342857	linear	0.117737	True	False
cg13308063	0.806834	0.012172	0.849536	linear	0.012172	False	False
cg06144418	0.00193912	0.153382	0.00532699	linear	0.153382	True	False
cg18221226	0.00864486	-0.130162	0.0187501	linear	0.130162	True	False
cg25535587	0.128196	-0.0756237	0.186035	linear	0.0756237	False	False
cg00060320	0.276749	-0.0541065	0.356004	linear	0.0541065	False	False
cg23341612	4.77977e-07	0.246766	5.67868e-06	linear	0.246766	True	False
cg01779732	0.153996	0.0708787	0.217433	linear	0.0708787	False	False
cg06439124	0.872199	-0.00800818	0.902248	linear	0.00800818	False	False
cg14314889	0.500543	0.0335259	0.580557	linear	0.0335259	False	False
cg01458961	0.0741867	-0.0887096	0.116805	linear	0.0887096	False	False
cg16454587	0.886007	0.00713668	0.913084	linear	0.00713668	False	False
cg11324740	0.000791437	-0.1659	0.0025316	linear	0.1659	True	False
cg27127351	0.764915	0.0148858	0.814792	linear	0.0148858	False	False
cg10136008	0.00144269	-0.157614	0.00416353	linear	0.157614	True	False
cg12197777	7.25543e-05	0.195614	0.000357801	linear	0.195614	True	False
cg26950953	0.207694	0.0626611	0.279767	linear	0.0626611	False	False
cg20291636	3.70698e-08	0.268952	6.70192e-07	linear	0.268952	True	False
cg09104394	0.211299	-0.0621681	0.283847	linear	0.0621681	False	False
cg24590093	0.103607	-0.080894	0.15524	linear	0.080894	False	False
cg01748572	1.82255e-06	-0.234257	1.73282e-05	linear	0.234257	True	False
cg24883601	0.0972095	0.0824257	0.147072	linear	0.0824257	False	False
cg04559178	0.00272023	-0.148406	0.00706856	linear	0.148406	True	False
cg16246590	0.610233	0.0253722	0.681284	linear	0.0253722	False	False
cg06298530	1.15102e-08	0.278462	2.50663e-07	linear	0.278462	True	False
cg07099161	0.980675	0.00120588	0.98581	linear	0.00120588	False	False
cg19593314	0.0603298	-0.0933064	0.0979313	linear	0.0933064	False	False
cg25127732	0.967479	-0.00202968	0.975799	linear	0.00202968	False	False
cg21482659	0.000164021	-0.185982	0.000695821	linear	0.185982	True	False
cg05855071	0.0830812	-0.086117	0.128642	linear	0.086117	False	False
cg23163999	0.00434711	-0.141258	0.0104944	linear	0.141258	True	False
cg00821483	0.00129977	-0.159082	0.00381768	linear	0.159082	True	False
cg26472036	0.0141607	-0.121671	0.028463	linear	0.121671	True	False
cg14694901	0.958607	-0.00258381	0.969067	linear	0.00258381	False	False
cg15156029	8.41721e-12	0.330476	5.99954e-10	linear	0.330476	True	False
cg25769590	0.0471301	-0.0985841	0.0792616	linear	0.0985841	False	False
cg24397939	0.000228181	-0.181944	0.000910408	linear	0.181944	True	False
cg14534848	0.217605	-0.0613203	0.290969	linear	0.0613203	False	False
cg02847766	0.00809654	0.131255	0.0177412	linear	0.131255	True	False
cg14298780	0.00346893	-0.144738	0.00867242	linear	0.144738	True	False
cg17872799	0.281367	-0.05359	0.360996	linear	0.05359	False	False
cg20000326	5.00888e-05	0.199839	0.000264019	linear	0.199839	True	False
cg19924862	0.232271	-0.0594142	0.307447	linear	0.0594142	False	False
cg22281494	0.0207789	0.114716	0.0394377	linear	0.114716	True	False
cg07689597	0.000404063	0.174745	0.00145452	linear	0.174745	True	False
cg14256699	0.072234	0.0893124	0.114159	linear	0.0893124	False	False
cg17404760	0.00123945	-0.159746	0.00367039	linear	0.159746	True	False
cg07286682	0.246175	0.0576844	0.322828	linear	0.0576844	False	False
cg15697225	0.0359775	0.104119	0.0629463	linear	0.104119	False	False
cg14131824	0.140272	-0.0733195	0.200839	linear	0.0733195	False	False
cg09199598	0.000270011	0.179852	0.00104485	linear	0.179852	True	False
cg24732702	2.18418e-07	0.253784	2.96074e-06	linear	0.253784	True	False
cg07618675	5.03569e-05	0.199779	0.000265157	linear	0.199779	True	False
cg18817750	0.767309	-0.0147297	0.816853	linear	0.0147297	False	False
cg24018609	9.94288e-05	-0.191949	0.00046241	linear	0.191949	True	False
cg02383285	0.000329905	0.177331	0.0012319	linear	0.177331	True	False
cg01799429	2.89862e-09	0.289231	7.8811e-08	linear	0.289231	True	False
cg26382679	0.000212209	0.182839	0.000858701	linear	0.182839	True	False
cg02368469	3.52263e-06	0.227835	2.98721e-05	linear	0.227835	True	False
cg01020840	0.00896257	-0.129557	0.0193271	linear	0.129557	True	False
cg24542230	3.6785e-07	0.249137	4.57428e-06	linear	0.249137	True	False
cg11363701	0.0437357	0.10014	0.0743651	linear	0.10014	False	False
cg08718490	0.0102347	-0.127311	0.0216158	linear	0.127311	True	False
cg10519903	2.19626e-06	0.232458	2.02367e-05	linear	0.232458	True	False
cg13347784	0.00585267	0.136554	0.0134754	linear	0.136554	True	False
cg06419236	3.27168e-08	0.269985	6.03472e-07	linear	0.269985	True	False
cg17682357	0.000164484	0.185948	0.000697471	linear	0.185948	True	False
cg10885151	0.350067	0.0464947	0.4329	linear	0.0464947	False	False
cg04058337	0.000192753	0.184019	0.000794181	linear	0.184019	True	False
cg11355215	0.567553	0.028453	0.64277	linear	0.028453	False	False
cg24472939	0.58539	0.0271529	0.658832	linear	0.0271529	False	False
cg26405695	0.00361783	-0.144096	0.00898768	linear	0.144096	True	False
cg25071520	0.00161506	-0.156011	0.00457371	linear	0.156011	True	False
cg10423328	0.000419278	0.17427	0.00149936	linear	0.17427	True	False
cg04786667	0.578715	0.0276372	0.652823	linear	0.0276372	False	False
cg08165291	0.00191432	0.153569	0.00526952	linear	0.153569	True	False
cg26983127	0.00110252	-0.161373	0.00333034	linear	0.161373	True	False
cg07799219	0.492135	0.0341866	0.572608	linear	0.0341866	False	False
cg27384352	0.0166851	-0.118737	0.0327157	linear	0.118737	True	False
cg11314668	0.000102689	0.191569	0.000474775	linear	0.191569	True	False
cg08220872	0.0460661	0.0990614	0.077741	linear	0.0990614	False	False
cg09702181	0.000265928	0.180042	0.00103173	linear	0.180042	True	False
cg07459170	0.90999	0.00562793	0.931767	linear	0.00562793	False	False
cg10555383	0.00519097	0.138469	0.0121846	linear	0.138469	True	False
cg09439238	0.00219136	-0.151602	0.00590067	linear	0.151602	True	False
cg16488098	0.659477	0.0219334	0.72474	linear	0.0219334	False	False
cg04122632	0.264368	-0.0555208	0.342726	linear	0.0555208	False	False
cg11619740	0.228964	-0.0598365	0.303742	linear	0.0598365	False	False
cg17062917	1.87196e-05	0.210656	0.000118186	linear	0.210656	True	False
cg21750659	2.00949e-06	0.233317	1.88019e-05	linear	0.233317	True	False
cg19839691	0.25995	-0.0560365	0.337912	linear	0.0560365	False	False
cg25544461	0.602952	0.0258906	0.674808	linear	0.0258906	False	False
cg05449100	0.606563	-0.0256332	0.678009	linear	0.0256332	False	False
cg02393606	0.0058209	0.136641	0.0134147	linear	0.136641	True	False
cg04656222	0.001052	0.162021	0.003203	linear	0.162021	True	False
cg23600533	0.544331	-0.0301752	0.621481	linear	0.0301752	False	False
cg03732759	2.30808e-11	0.323793	1.38948e-09	linear	0.323793	True	False
cg25797455	0.000174769	0.185213	0.00073264	linear	0.185213	True	False
cg05815920	0.0028897	-0.147502	0.00743609	linear	0.147502	True	False
cg06331862	0.134802	0.0743435	0.194168	linear	0.0743435	False	False
cg16472965	0.268532	-0.0550402	0.347181	linear	0.0550402	False	False
cg00836641	0.0962336	-0.0826664	0.145825	linear	0.0826664	False	False
cg17862837	2.17298e-08	0.273341	4.27904e-07	linear	0.273341	True	False
cg10145528	0.0791144	-0.087244	0.123378	linear	0.087244	False	False
cg19398269	0.0105919	0.126725	0.0222544	linear	0.126725	True	False
cg11878419	3.8481e-06	0.226959	3.21445e-05	linear	0.226959	True	False
cg15974487	0.0194965	0.115895	0.0373492	linear	0.115895	True	False
cg14479139	0.00455263	0.140536	0.0109119	linear	0.140536	True	False
cg00033773	1.63187e-10	0.310345	7.09897e-09	linear	0.310345	True	False
cg16468388	6.38756e-08	0.264399	1.0558e-06	linear	0.264399	True	False
cg18683604	0.353741	0.0461418	0.436676	linear	0.0461418	False	False
cg23369563	0.000456759	-0.173164	0.0016092	linear	0.173164	True	False
cg18124764	7.85991e-06	0.219752	5.7813e-05	linear	0.219752	True	False
cg08136221	0.0640107	0.0920071	0.103022	linear	0.0920071	False	False
cg09288606	0.889436	-0.0069206	0.915805	linear	0.0069206	False	False
cg23422463	0.000897158	-0.164202	0.0028064	linear	0.164202	True	False
cg14862787	0.000366785	0.175984	0.00134386	linear	0.175984	True	False
cg16402286	3.48076e-05	0.203906	0.000196133	linear	0.203906	True	False
cg06793162	0.0365006	0.103829	0.0637292	linear	0.103829	False	False
cg19268695	0.823736	-0.0110884	0.863258	linear	0.0110884	False	False
cg26561313	6.73998e-07	0.243619	7.57297e-06	linear	0.243619	True	False
cg14333394	0.0370909	0.103506	0.0646058	linear	0.103506	False	False
cg10002561	0.0699568	-0.0900324	0.111073	linear	0.0900324	False	False
cg23658709	0.000166794	0.185779	0.000705375	linear	0.185779	True	False
cg23054321	2.30323e-05	-0.208424	0.000140131	linear	0.208424	True	False
cg21404933	0.000551872	0.170697	0.00187894	linear	0.170697	True	False
cg02472486	0.268657	-0.0550259	0.347314	linear	0.0550259	False	False
cg26859016	0.026723	0.109961	0.048844	linear	0.109961	True	False
cg25688568	0.111767	-0.0790455	0.165593	linear	0.0790455	False	False
cg00040590	2.40467e-07	0.252934	3.20735e-06	linear	0.252934	True	False
cg18267489	0.000236024	-0.181526	0.000935656	linear	0.181526	True	False
cg13419390	0.703941	-0.018916	0.763283	linear	0.018916	False	False
cg27510182	0.950612	0.00308343	0.962816	linear	0.00308343	False	False
cg22016716	0.00687112	0.133957	0.0154423	linear	0.133957	True	False
cg21851967	0.198604	-0.063932	0.26948	linear	0.063932	False	False
cg06654905	0.00293299	-0.147279	0.00752956	linear	0.147279	True	False
cg11235259	0.330732	0.0483923	0.41292	linear	0.0483923	False	False
cg27324804	0.922886	0.00481889	0.941538	linear	0.00481889	False	False
cg05626073	3.60103e-06	0.227617	3.0418e-05	linear	0.227617	True	False
cg08835847	0.00151491	-0.156922	0.00433714	linear	0.156922	True	False
cg19070138	0.354197	0.0460981	0.437158	linear	0.0460981	False	False
cg08657587	3.91075e-10	0.304109	1.47741e-08	linear	0.304109	True	False
cg26163375	0.209989	0.0623466	0.282354	linear	0.0623466	False	False
cg19607165	0.00021024	-0.182954	0.000852106	linear	0.182954	True	False
cg11854917	0.0191219	0.116252	0.0367391	linear	0.116252	True	False
cg15268007	0.757182	0.0153911	0.808323	linear	0.0153911	False	False
cg22318139	0.00194836	0.153314	0.005349	linear	0.153314	True	False
cg07605988	0.000345227	0.176755	0.00127863	linear	0.176755	True	False
cg27297753	0.0278289	-0.109179	0.0505626	linear	0.109179	False	False
cg02964474	0.000254592	-0.180586	0.000995527	linear	0.180586	True	False
cg20215622	0.21272	0.0619755	0.285451	linear	0.0619755	False	False
cg00230517	0.119382	0.0774138	0.175104	linear	0.0774138	False	False
cg19889044	5.41272e-10	0.301752	1.94108e-08	linear	0.301752	True	False
cg21305756	0.0659925	0.0913328	0.105719	linear	0.0913328	False	False
cg09883987	3.01862e-05	0.205476	0.000174726	linear	0.205476	True	False
cg27600381	0.235726	0.0589778	0.311239	linear	0.0589778	False	False
cg15424250	0.0218979	-0.113738	0.0412378	linear	0.113738	True	False
cg17319788	1.23983e-11	0.32793	8.29562e-10	linear	0.32793	True	False
cg09899173	0.350761	0.0464279	0.433601	linear	0.0464279	False	False
cg00944001	0.0882157	0.0847211	0.135387	linear	0.0847211	False	False
cg16599698	0.686715	0.0200761	0.748525	linear	0.0200761	False	False
cg25773246	0.0011359	-0.16096	0.00341372	linear	0.16096	True	False
cg14256587	0.00873943	-0.12998	0.0189239	linear	0.12998	True	False
cg01692968	0.790863	0.0132013	0.836401	linear	0.0132013	False	False
cg26157031	0.124973	-0.0762668	0.182074	linear	0.0762668	False	False
cg04250181	0.0051083	-0.138723	0.0120207	linear	0.138723	True	False
cg21607137	4.79846e-05	0.200323	0.000254857	linear	0.200323	True	False
cg02807786	4.27585e-10	0.303464	1.59382e-08	linear	0.303464	True	False
cg01082168	0.00272777	0.148365	0.00708477	linear	0.148365	True	False
cg21158528	0.0948022	0.0830229	0.143983	linear	0.0830229	False	False
cg02505681	7.70678e-05	0.194917	0.000376071	linear	0.194917	True	False
cg18484166	0.0319269	-0.106496	0.0568481	linear	0.106496	False	False
cg16005883	0.938559	0.0038373	0.953451	linear	0.0038373	False	False
cg09945147	0.000760701	0.166433	0.00244984	linear	0.166433	True	False
cg06697536	0.851183	-0.00933948	0.885519	linear	0.00933948	False	False
cg03468739	0.302347	-0.0513126	0.383223	linear	0.0513126	False	False
cg05676450	0.453419	0.0373104	0.535503	linear	0.0373104	False	False
cg06824795	0.00414591	0.141995	0.0100828	linear	0.141995	True	False
cg16636756	0.624315	0.0243771	0.693806	linear	0.0243771	False	False
cg02098752	0.00778317	-0.131909	0.01716	linear	0.131909	True	False
cg26844077	0.0179273	0.117433	0.0347802	linear	0.117433	True	False
cg21774842	0.0010853	0.161591	0.00328685	linear	0.161591	True	False
cg25229089	0.0426225	0.100672	0.0727441	linear	0.100672	False	False
cg22399096	0.658529	-0.0219985	0.723911	linear	0.0219985	False	False
cg26085285	0.11428	-0.0784976	0.168756	linear	0.0784976	False	False
cg16976520	0.0541632	0.0956381	0.0893252	linear	0.0956381	False	False
cg06006403	0.0018656	-0.153941	0.00515773	linear	0.153941	True	False
cg12026479	0.393616	-0.0424493	0.47694	linear	0.0424493	False	False
cg19526568	0.969251	0.00191903	0.977123	linear	0.00191903	False	False
cg12691572	0.0347371	-0.104822	0.0610968	linear	0.104822	False	False
cg26596964	0.492953	-0.034122	0.573358	linear	0.034122	False	False
cg23181311	0.00506061	0.138871	0.0119233	linear	0.138871	True	False
cg01671171	0.0012478	-0.159653	0.0036905	linear	0.159653	True	False
cg17149563	0.00271868	-0.148415	0.00706522	linear	0.148415	True	False
cg24854085	0.212138	-0.0620543	0.28481	linear	0.0620543	False	False
cg20552468	0.0137784	-0.122155	0.0278128	linear	0.122155	True	False
cg21875839	4.01495e-05	0.20232	0.00022045	linear	0.20232	True	False
cg09243811	0.308832	-0.0506301	0.390092	linear	0.0506301	False	False
cg19294653	0.778889	0.0139767	0.826399	linear	0.0139767	False	False
cg10355965	4.32349e-06	0.2258	3.53542e-05	linear	0.2258	True	False
cg00336605	0.243652	-0.0579931	0.320039	linear	0.0579931	False	False
cg21519781	0.434824	-0.0388637	0.517347	linear	0.0388637	False	False
cg10418162	0.000134677	-0.188354	0.000592124	linear	0.188354	True	False
cg02430138	0.0178279	-0.117535	0.0346126	linear	0.117535	True	False
cg11845417	1.80017e-07	0.255485	2.51894e-06	linear	0.255485	True	False
cg22777062	0.172905	-0.0677722	0.239849	linear	0.0677722	False	False
cg07503294	0.000127524	-0.189005	0.00056645	linear	0.189005	True	False
cg06233815	0.0382768	-0.10287	0.0663728	linear	0.10287	False	False
cg13011453	6.37157e-05	0.197105	0.000321459	linear	0.197105	True	False
cg14696996	0.0049084	0.139354	0.011621	linear	0.139354	True	False
cg25416270	5.03435e-05	0.199782	0.000265108	linear	0.199782	True	False
cg13496979	0.597833	-0.0262568	0.670111	linear	0.0262568	False	False
cg11032077	0.096499	0.0826008	0.14616	linear	0.0826008	False	False
cg13661129	0.00458216	0.140435	0.0109715	linear	0.140435	True	False
cg00407329	0.966514	-0.00208991	0.97511	linear	0.00208991	False	False
cg07160937	0.0204426	-0.115019	0.0388922	linear	0.115019	True	False
cg20624980	1.01922e-05	-0.217069	7.16352e-05	linear	0.217069	True	False
cg18764107	0.0523698	-0.0963576	0.0867747	linear	0.0963576	False	False
cg22755534	0.000475075	0.172654	0.00166211	linear	0.172654	True	False
cg26861703	0.139333	-0.073493	0.1997	linear	0.073493	False	False
cg19910220	0.529613	-0.0312856	0.607895	linear	0.0312856	False	False
cg18760920	0.00134458	-0.158606	0.00392739	linear	0.158606	True	False
cg07164287	0.975952	0.00150063	0.982247	linear	0.00150063	False	False
cg04966682	0.0190098	0.11636	0.0365576	linear	0.11636	True	False
cg03592411	0.0749962	-0.0884636	0.117896	linear	0.0884636	False	False
cg08435157	5.94046e-09	0.283685	1.43689e-07	linear	0.283685	True	False
cg10276227	0.000776887	-0.16615	0.00249238	linear	0.16615	True	False
cg02958263	0.013298	-0.12278	0.0269849	linear	0.12278	True	False
cg25885280	0.000839869	0.165098	0.00265826	linear	0.165098	True	False
cg14269510	0.000283954	-0.179222	0.00108893	linear	0.179222	True	False
cg08906246	0.162361	0.0694711	0.227466	linear	0.0694711	False	False
cg06527438	0.000141131	0.187793	0.000615506	linear	0.187793	True	False
rs1467387	0.00400282	-0.142539	0.00978827	linear	0.142539	True	False
cg23721088	0.202568	-0.0633727	0.273955	linear	0.0633727	False	False
cg14826215	0.890723	0.00683955	0.916769	linear	0.00683955	False	False
cg22064182	0.000196049	0.183811	0.000805257	linear	0.183811	True	False
cg06310698	4.91431e-07	0.246514	5.80955e-06	linear	0.246514	True	False
cg18380974	0.00271933	-0.148411	0.00706661	linear	0.148411	True	False
cg07295092	7.28882e-06	-0.220524	5.43805e-05	linear	0.220524	True	False
cg04285130	0.248298	0.0574263	0.325102	linear	0.0574263	False	False
cg14617020	0.000419482	0.174264	0.0014999	linear	0.174264	True	False
cg18119977	0.35063	0.0464405	0.433469	linear	0.0464405	False	False
cg05659420	5.99667e-05	0.197798	0.000306047	linear	0.197798	True	False
cg05307864	0.0366049	-0.103772	0.0638852	linear	0.103772	False	False
cg02590886	3.25594e-06	-0.228612	2.79813e-05	linear	0.228612	True	False
cg16736259	6.68008e-05	0.196564	0.000334266	linear	0.196564	True	False
cg10037579	1.04135e-07	0.260235	1.59095e-06	linear	0.260235	True	False
cg16666160	2.02503e-05	0.209813	0.000126049	linear	0.209813	True	False
cg26693953	0.000445263	0.173494	0.00157525	linear	0.173494	True	False
cg21774377	0.0243439	-0.111742	0.0451164	linear	0.111742	True	False
cg25840649	0.699157	-0.0192371	0.759119	linear	0.0192371	False	False
cg24709951	7.40848e-05	-0.195373	0.000363954	linear	0.195373	True	False
cg12662887	0.744565	0.0162188	0.797652	linear	0.0162188	False	False
cg06927361	1.01601e-08	0.279456	2.25819e-07	linear	0.279456	True	False
cg25723614	0.479971	0.0351531	0.561008	linear	0.0351531	False	False
cg07441944	2.3127e-09	0.290952	6.51848e-08	linear	0.290952	True	False
cg13242944	6.31423e-09	0.283207	1.51264e-07	linear	0.283207	True	False
cg00094595	0.000627099	0.169011	0.00208763	linear	0.169011	True	False
cg07992484	0.00504501	-0.13892	0.0118914	linear	0.13892	True	False
cg24054774	0.2283	0.0599217	0.303012	linear	0.0599217	False	False
cg13238479	0.0947508	-0.0830358	0.14392	linear	0.0830358	False	False
cg21557030	0.182524	-0.0662885	0.251008	linear	0.0662885	False	False
cg25793831	0.0389703	-0.102505	0.0673937	linear	0.102505	False	False
cg13969413	0.00114081	-0.1609	0.00342575	linear	0.1609	True	False
cg24944959	0.630202	0.023964	0.698984	linear	0.023964	False	False
cg26181865	0.654303	-0.0222895	0.720174	linear	0.0222895	False	False
cg24426778	0.0589396	0.0938142	0.0960176	linear	0.0938142	False	False
cg14975429	0.00810413	0.131239	0.0177549	linear	0.131239	True	False
cg08018572	1.74974e-07	0.255734	2.46066e-06	linear	0.255734	True	False
cg13403999	0.00377858	0.143428	0.00932508	linear	0.143428	True	False
cg08516450	0.000154751	-0.186685	0.000663649	linear	0.186685	True	False
cg22981555	0.00452163	-0.140643	0.0108493	linear	0.140643	True	False
cg12298745	0.115741	-0.0781835	0.170553	linear	0.0781835	False	False
cg05948101	1.80128e-06	0.23437	1.71571e-05	linear	0.23437	True	False
cg04633225	0.238859	-0.0585859	0.314706	linear	0.0585859	False	False
cg18606098	0.292536	-0.052364	0.372846	linear	0.052364	False	False
cg26405097	4.80859e-05	0.200299	0.000255266	linear	0.200299	True	False
cg13615027	0.554997	-0.0293798	0.631319	linear	0.0293798	False	False
cg11453079	6.77399e-08	0.263902	1.10933e-06	linear	0.263902	True	False
cg22865713	0.0062926	0.135386	0.0143343	linear	0.135386	True	False
cg08578520	0.113907	0.0785783	0.168291	linear	0.0785783	False	False
cg13938785	2.03337e-10	0.308789	8.55273e-09	linear	0.308789	True	False
cg12762527	0.000301303	-0.178477	0.0011436	linear	0.178477	True	False
cg22151941	0.999996	-2.21706e-07	0.999999	linear	2.21706e-07	False	False
cg01963147	0.0010322	0.162283	0.00315196	linear	0.162283	True	False
cg08217163	3.45599e-09	-0.287883	9.13389e-08	linear	0.287883	True	False
cg06654901	0.0122914	0.124157	0.0252536	linear	0.124157	True	False
cg25982969	0.0651012	0.0916339	0.1045	linear	0.0916339	False	False
cg00001249	4.37312e-08	0.267578	7.70315e-07	linear	0.267578	True	False
cg00752531	1.93402e-06	0.233686	1.82062e-05	linear	0.233686	True	False
cg00727940	0.556921	-0.0292372	0.633095	linear	0.0292372	False	False
cg26247646	0.000459985	-0.173073	0.00161891	linear	0.173073	True	False
cg27379773	1.7147e-05	-0.211594	0.000109993	linear	0.211594	True	False
cg12375903	0.00467359	0.140125	0.0111562	linear	0.140125	True	False
cg08799270	0.0559407	0.0949444	0.0918141	linear	0.0949444	False	False
cg17527195	0.0905632	0.0841045	0.138459	linear	0.0841045	False	False
cg15907699	0.0421064	-0.100923	0.0719975	linear	0.100923	False	False
cg05085336	0.691183	0.0197743	0.752373	linear	0.0197743	False	False
cg08404557	0.0971026	0.082452	0.146937	linear	0.082452	False	False
cg05709196	0.709324	0.0185556	0.767914	linear	0.0185556	False	False
cg14439353	0.000605726	-0.16947	0.00202923	linear	0.16947	True	False
cg11464074	0.111405	0.0791251	0.165149	linear	0.0791251	False	False
cg05380741	0.206055	-0.0628872	0.277901	linear	0.0628872	False	False
cg07443529	0.0048264	0.139619	0.0114584	linear	0.139619	True	False
cg23690785	0.00468444	-0.140089	0.0111776	linear	0.140089	True	False
cg11769400	0.131077	0.0750591	0.189585	linear	0.0750591	False	False
cg08413646	5.65367e-06	0.223106	4.40909e-05	linear	0.223106	True	False
cg00169917	0.209832	-0.062368	0.282181	linear	0.062368	False	False
cg05955675	0.487997	0.0345139	0.568612	linear	0.0345139	False	False
cg24229707	2.6199e-12	0.338012	2.27543e-10	linear	0.338012	True	False
cg04825431	0.000309172	0.178152	0.00116859	linear	0.178152	True	False
cg22395807	0.300255	-0.0515349	0.380993	linear	0.0515349	False	False
cg08474340	7.46646e-07	0.242673	8.24926e-06	linear	0.242673	True	False
cg18748499	0.00679373	0.134142	0.0152956	linear	0.134142	True	False
cg01646610	0.00225657	-0.151172	0.00604576	linear	0.151172	True	False
cg10266121	0.958725	0.00257645	0.969143	linear	0.00257645	False	False
cg14814331	0.00137702	0.158271	0.00400424	linear	0.158271	True	False
cg26745222	0.543422	0.0302434	0.62068	linear	0.0302434	False	False
cg24949344	0.170667	-0.0681262	0.237258	linear	0.0681262	False	False
cg06327596	0.00244868	-0.149968	0.00647231	linear	0.149968	True	False
cg08222221	0.539684	-0.0305242	0.617241	linear	0.0305242	False	False
cg24124753	0.911371	-0.00554126	0.932807	linear	0.00554126	False	False
cg16205844	0.000152874	-0.186832	0.000656812	linear	0.186832	True	False
cg18173859	0.000826296	0.165318	0.00262273	linear	0.165318	True	False
cg06769231	0.180245	0.0666347	0.248381	linear	0.0666347	False	False
cg11696576	0.0168213	0.11859	0.0329417	linear	0.11859	True	False
cg05742988	0.00152538	-0.156824	0.00436231	linear	0.156824	True	False
cg12256856	0.000866387	0.164676	0.0027269	linear	0.164676	True	False
cg05905531	0.581402	0.0274419	0.65523	linear	0.0274419	False	False
cg06632759	1.12678e-06	-0.238831	1.16015e-05	linear	0.238831	True	False
cg18803856	0.00283288	0.1478	0.00731335	linear	0.1478	True	False
cg19539568	0.120236	0.0772358	0.176161	linear	0.0772358	False	False
cg08808904	0.0114552	0.125378	0.0237861	linear	0.125378	True	False
cg07075299	0.000359947	0.176224	0.00132322	linear	0.176224	True	False
cg21875980	0.126715	-0.0759176	0.184232	linear	0.0759176	False	False
cg21573200	0.0187135	-0.116649	0.0360781	linear	0.116649	True	False
cg22935450	0.349514	-0.046548	0.43233	linear	0.046548	False	False
cg21809744	0.0317408	0.106611	0.0565579	linear	0.106611	False	False
cg18347602	0.00920538	0.129107	0.0197683	linear	0.129107	True	False
cg11586666	1.13335e-07	0.259507	1.70837e-06	linear	0.259507	True	False
cg00447052	0.000788271	-0.165954	0.00252323	linear	0.165954	True	False
cg19912332	4.7226e-05	0.200502	0.000251506	linear	0.200502	True	False
cg14217102	0.00214504	-0.151914	0.00579621	linear	0.151914	True	False
cg22709008	4.00005e-07	0.248381	4.90187e-06	linear	0.248381	True	False
cg07395969	0.000478222	-0.172568	0.00167123	linear	0.172568	True	False
cg17958291	0.661724	0.021779	0.726741	linear	0.021779	False	False
cg12077660	3.78541e-06	-0.227122	3.17024e-05	linear	0.227122	True	False
cg01562897	4.63786e-07	0.24704	5.53824e-06	linear	0.24704	True	False
cg20077169	0.0236232	-0.112312	0.0439875	linear	0.112312	True	False
cg10434754	0.000906835	0.164055	0.00283111	linear	0.164055	True	False
cg18646186	5.13737e-07	0.246109	6.03146e-06	linear	0.246109	True	False
cg06156502	0.534138	0.0309425	0.612111	linear	0.0309425	False	False
cg16922785	0.923464	-0.00478268	0.941955	linear	0.00478268	False	False
cg25308427	0.99897	-6.42594e-05	0.999267	linear	6.42594e-05	False	False
cg24269657	0.0875806	0.0848902	0.13455	linear	0.0848902	False	False
cg02267408	0.479005	-0.0352304	0.560095	linear	0.0352304	False	False
cg12937378	0.00301226	-0.146878	0.00769928	linear	0.146878	True	False
cg25947878	0.109903	-0.079458	0.163256	linear	0.079458	False	False
cg20119308	0.574958	-0.0279109	0.649474	linear	0.0279109	False	False
cg25466588	0.363371	-0.0452273	0.446491	linear	0.0452273	False	False
cg20938170	0.000223211	0.182216	0.000894314	linear	0.182216	True	False
cg02387056	0.000599675	0.169603	0.00201278	linear	0.169603	True	False
cg12411965	0.022736	0.113033	0.0425757	linear	0.113033	True	False
cg12872962	0.0316262	-0.106683	0.0563832	linear	0.106683	False	False
cg17560338	4.22322e-05	-0.201756	0.00022973	linear	0.201756	True	False
cg02698708	0.00199928	0.152939	0.00546421	linear	0.152939	True	False
[truncated: 731,727+ more rows]

## Sheet: Supplementary Table 4
LOOC-excluded Dataset	N	RMS	MAE	r
GSE74214	18	20.8944	18.2457	0.955648
GSE108213	8	2.79429	2.35196	0.953419
GSE69914	49	7.44595	4.4404	0.858813
GSE88883	100	5.11009	4.13697	0.957839
GSE225845	231	5.7312	3.37604	0.893603

## Sheet: Supplementary Table 5
	Coefficient	order
Intercept	-34.2586	0
cg04845871	-7.66572	1
cg08946658	-6.03163	1
cg25323057	-5.91704	1
cg02076355	-5.15443	1
cg02458141	-4.62976	1
cg25467652	-4.61782	1
cg07788865	-4.23426	1
cg07078958	-4.19571	1
cg24105287	-4.16454	1
cg14255824	-4.07567	1
cg23314364	-3.89162	1
cg10789314	-3.8711	1
cg17566735	-3.77942	1
cg20518446	-3.76154	1
cg02821342	-3.76081	1
cg25744613	-3.72487	1
cg26140475	-3.66114	1
cg04645070	-3.62356	1
cg21537049	-3.60118	1
cg03495084	-3.54469	1
cg06084073	-3.52596	1
cg13096351	-3.46154	1
cg15571405	-3.37293	1
cg03370704	-3.26864	1
cg14284211	-3.18782	1
cg24895178	-3.12409	1
cg14871225	-3.10466	1
cg24170085	-3.06085	1
cg11230435	-3.05541	1
cg14447810	-2.99797	1
cg18825531	-2.93142	1
cg01346501	-2.78232	1
cg27181375	-2.78007	1
cg15857635	-2.73081	1
cg26279371	-2.59846	1
cg04767507	-2.574	1
cg26711406	-2.56922	1
cg17935811	-2.52775	1
cg03341233	-2.44981	1
cg22658311	-2.43237	1
cg09650907	-2.41766	1
cg21727223	-2.35414	1
cg06568490	-2.32675	1
cg21787249	-2.31998	1
cg12428326	-2.31861	1
cg16894138	-2.31381	1
cg26652413	-2.30979	1
cg01511742	-2.20632	1
cg18738985	-2.17906	1
cg19937878	-2.14316	1
cg00066663	-2.10705	1
cg12076692	-2.10023	1
cg09489470	-2.07125	1
cg07668993	-2.03085	1
cg06062998	-2.00778	1
cg20143092	-1.9838	1
cg17112707	-1.93956	1
cg23999833	-1.92258	1
cg22340475	-1.91046	1
cg22654656	-1.90966	1
cg03465682	-1.87888	1
cg01671895	-1.86162	1
cg23532985	-1.85644	1
cg08568298	-1.85427	1
cg00085493	-1.83644	1
cg01512113	-1.83198	1
cg03539717	-1.82807	1
cg07028415	-1.79258	1
cg01890836	-1.78702	1
cg13818276	-1.7542	1
cg07890839	-1.75417	1
cg14434062	-1.68206	1
cg07614623	-1.63055	1
cg22273939	-1.62866	1
cg18625289	-1.6233	1
cg03503871	-1.60622	1
cg20706495	-1.60173	1
cg11342615	-1.59071	1
cg20025677	-1.568	1
cg17554182	-1.56491	1
cg00241281	-1.55566	1
cg13753460	-1.52177	1
cg20852557	-1.50628	1
cg00028336	-1.50342	1
cg06508005	-1.48348	1
cg01010923	-1.43155	1
cg18493314	-1.40846	1
cg00330825	-1.4015	1
cg16022049	-1.3885	1
cg26283098	-1.37746	1
cg18276125	-1.33844	1
cg18662080	-1.32951	1
cg05228359	-1.31648	1
cg14431361	-1.31364	1
cg27658391	-1.29959	1
cg13518625	-1.29353	1
cg04965094	-1.2907	1
cg11403598	-1.28594	1
cg07558209	-1.28412	1
cg03366992	-1.25148	1
cg11385003	-1.25122	1
cg10564791	-1.24104	1
cg06922393	-1.2181	1
cg05949889	-1.1916	1
cg06030846	-1.17485	1
cg01346152	-1.16185	1
cg20544516	-1.16132	1
cg09080114	-1.15811	1
cg25636481	-1.13654	1
cg09548403	-1.13236	1
cg08520742	-1.13125	1
cg13826105	-1.12979	1
cg01765641	-1.08726	1
cg04437845	-1.08394	1
cg04177015	-1.08294	1
cg08216943	-1.04771	1
cg27179571	-1.03998	1
cg05031801	-1.01248	1
cg09623845	-1.00011	1
cg20599086	-0.993906	1
cg18729787	-0.991175	1
cg05726118	-0.953174	1
cg24315421	-0.950519	1
cg17490283	-0.94911	1
cg16549027	-0.904059	1
cg25264630	-0.872426	1
cg08459783	-0.863999	1
cg23259527	-0.85311	1
cg05262711	-0.837719	1
cg06454901	-0.827894	1
cg12002710	-0.827185	1
cg01431482	-0.815102	1
cg09445967	-0.809075	1
cg06530983	-0.805236	1
cg01153946	-0.804531	1
cg22329027	-0.79806	1
cg04258676	-0.796065	1
cg12153480	-0.791534	1
cg06015142	-0.786213	1
cg01071511	-0.770111	1
cg18086520	-0.765394	1
cg20689661	-0.764751	1
cg08739115	-0.750749	1
cg05638500	-0.748968	1
cg12763813	-0.74018	1
cg21089789	-0.738219	1
cg06413794	-0.734633	1
cg04908961	-0.729644	1
cg15777261	-0.715358	1
cg12032049	-0.711638	1
cg16143325	-0.693318	1
cg10021411	-0.692023	1
cg07168930	-0.690281	1
cg03610636	-0.687365	1
cg06359056	-0.684629	1
cg11463380	-0.676813	1
cg09730123	-0.667504	1
cg20167471	-0.665476	1
cg20382028	-0.647106	1
cg00532335	-0.639522	1
cg07993350	-0.626603	1
cg09329097	-0.619971	1
cg16058485	-0.611427	1
cg14981819	-0.602163	1
cg17864650	-0.587714	1
cg23558337	-0.577465	1
cg10234511	-0.570984	1
cg03303325	-0.558873	1
cg07220152	-0.555251	1
cg09746086	-0.545362	1
cg15345907	-0.537118	1
cg26605700	-0.528366	1
cg10207362	-0.523916	1
cg10784519	-0.519718	1
cg06539449	-0.51842	1
cg06973176	-0.51409	1
cg26066433	-0.487095	1
cg05105477	-0.479639	1
cg09868882	-0.476198	1
cg08231664	-0.448892	1
cg24204847	-0.445479	1
cg08767838	-0.444009	1
cg16164923	-0.439636	1
cg18845578	-0.433833	1
cg01430430	-0.413258	1
cg06430772	-0.410782	1
cg02402882	-0.408237	1
cg12231584	-0.38867	1
cg13224583	-0.387513	1
cg02583228	-0.379401	1
cg18234606	-0.378852	1
cg16002887	-0.357838	1
cg05703211	-0.350818	1
cg01908954	-0.343502	1
cg00741992	-0.339876	1
cg16373176	-0.335608	1
cg00667298	-0.335394	1
cg10192641	-0.332121	1
cg06191348	-0.324239	1
cg17265115	-0.321183	1
cg22622425	-0.319353	1
cg07437263	-0.319281	1
cg13043300	-0.318879	1
cg20490900	-0.307581	1
cg05813616	-0.297513	1
cg23586440	-0.294648	1
cg07936585	-0.274797	1
cg23367683	-0.26749	1
cg07224469	-0.258681	1
cg24607283	-0.258602	1
cg13007207	-0.251384	1
cg23855818	-0.240603	1
cg03078672	-0.238727	1
cg03339956	-0.229309	1
cg20953047	-0.224157	1
cg04682699	-0.221646	1
cg19832832	-0.212611	1
cg08173649	-0.209826	1
cg14578500	-0.201853	1
cg16490191	-0.193783	1
cg13970540	-0.189773	1
cg06617217	-0.189696	1
cg17080740	-0.180322	1
cg04881751	-0.160602	1
cg15048099	-0.158306	1
cg21399778	-0.154705	1
cg01140247	-0.148746	1
cg04885315	-0.146813	1
cg18784113	-0.142273	1
cg23436042	-0.139584	1
cg14364926	-0.128844	1
cg00387551	-0.0991807	1
cg06202426	-0.0983407	1
cg00584026	-0.0962258	1
cg24701662	-0.0804412	1
cg08827700	-0.0773539	1
cg06739752	-0.0744967	1
cg06915470	-0.0732776	1
cg00786909	-0.0723018	1
cg25865120	-0.0557823	1
cg15733049	-0.0424654	1
cg21520772	-0.0373431	1
cg15101483	-0.035445	1
cg07177395	-0.0337145	1
cg01410314	-0.0336575	1
cg26568075	-0.0307234	1
cg27052183	-0.027715	1
cg25590826	-0.0242266	1
cg10981580	-0.0235791	1
cg15471073	-0.0061954	1
cg12262181	-0.000198278	1
cg26875852	0.00805118	1
cg14375747	0.0110751	1
cg20978460	0.0132293	1
cg16530128	0.0139805	1
cg17110586	0.0140016	1
cg12100751	0.0143137	1
cg06442489	0.0178012	1
cg15970457	0.0181494	1
cg19746343	0.0250482	1
cg11553687	0.0272593	1
cg09862914	0.0280069	1
cg08140609	0.0281576	1
cg10016004	0.0325867	1
cg11082362	0.0326937	1
cg00180930	0.0430365	1
cg27011829	0.0456024	1
cg20080282	0.0482135	1
cg11818438	0.0495654	1
cg04023742	0.0528596	1
cg18831134	0.0567638	1
cg21855910	0.0575266	1
cg25245569	0.0595532	1
cg11267480	0.0675178	1
cg03837111	0.0724063	1
cg13599835	0.0757586	1
cg01845501	0.0759661	1
cg24137448	0.0773776	1
cg11965881	0.080242	1
cg03661054	0.082072	1
cg05532093	0.0825673	1
cg14184729	0.0884771	1
cg19122460	0.0934367	1
cg10745988	0.0937105	1
cg18159646	0.0970431	1
cg13340085	0.114556	1
cg14006649	0.119881	1
cg20543092	0.123386	1
cg05240712	0.125724	1
cg11526073	0.129232	1
cg22930390	0.132701	1
cg02202502	0.162902	1
cg21105175	0.163096	1
cg13449372	0.170228	1
cg26884787	0.178004	1
cg18366882	0.178018	1
cg08111414	0.186032	1
cg11811840	0.193348	1
cg01868791	0.20018	1
cg14544225	0.201124	1
cg22838685	0.201125	1
cg14288335	0.214814	1
cg11888359	0.217267	1
cg23193759	0.224469	1
cg00162859	0.227199	1
cg19410796	0.22918	1
cg09609051	0.244944	1
cg15563355	0.24711	1
cg26856080	0.247795	1
cg23998119	0.24999	1
cg23800169	0.251266	1
cg10774647	0.25688	1
cg16559361	0.260884	1
cg10569694	0.261841	1
cg06555661	0.26704	1
cg12926839	0.270551	1
cg03702686	0.272028	1
cg21805880	0.28153	1
cg26268968	0.285898	1
cg25202261	0.286616	1
cg13833040	0.293584	1
cg14386870	0.295851	1
cg06545359	0.296357	1
cg05637113	0.310697	1
cg00590036	0.314523	1
cg02262037	0.316069	1
cg14514991	0.318383	1
cg05092960	0.318562	1
cg17152322	0.318952	1
cg02049979	0.321952	1
cg00090787	0.344608	1
cg10534359	0.349191	1
cg00593900	0.359262	1
cg14555736	0.363682	1
cg10048490	0.368629	1
cg13943358	0.372654	1
cg11933290	0.374397	1
cg09774649	0.374693	1
cg08367318	0.382758	1
cg04117455	0.382927	1
cg12981876	0.383012	1
cg05917988	0.395011	1
cg12165943	0.406496	1
cg17802216	0.41174	1
cg13649056	0.415859	1
cg05558539	0.416806	1
cg15561453	0.433271	1
cg07220650	0.436714	1
cg12063018	0.444421	1
cg20666186	0.453569	1
cg16541852	0.456051	1
cg03594801	0.457044	1
cg13231680	0.459491	1
cg19047670	0.479346	1
cg08285489	0.480526	1
cg18671115	0.481489	1
cg03043671	0.483023	1
cg08526705	0.485729	1
cg00601711	0.487414	1
cg14674720	0.494831	1
cg00748589	0.495075	1
cg15623062	0.496834	1
cg04945634	0.497541	1
cg16446346	0.49869	1
cg24459227	0.498948	1
cg04582295	0.499883	1
cg24358467	0.500494	1
cg05641843	0.50211	1
cg01933709	0.516316	1
cg20226327	0.517145	1
cg23386779	0.518632	1
cg23674189	0.530843	1
cg14614689	0.534841	1
cg03576555	0.542224	1
cg21700723	0.556926	1
cg02118776	0.557186	1
cg11177223	0.55965	1
cg06852243	0.570473	1
cg06637032	0.570836	1
cg06121469	0.573665	1
cg25876227	0.580894	1
cg19060970	0.58589	1
cg18569335	0.590296	1
cg26866474	0.593424	1
cg08491437	0.594307	1
cg05240982	0.595324	1
cg21196551	0.602802	1
cg22212250	0.60695	1
cg21293117	0.610838	1
cg13460409	0.616091	1
cg13300521	0.617465	1
cg19701014	0.619436	1
cg00818822	0.630028	1
cg06648759	0.634679	1
cg19742341	0.639301	1
cg18861551	0.653967	1
cg13771219	0.65918	1
cg11788425	0.661211	1
cg07760161	0.663516	1
cg04065767	0.664362	1
cg15028232	0.670793	1
cg27426151	0.67145	1
cg03406993	0.671878	1
cg07392449	0.677684	1
cg03289072	0.67939	1
cg22796923	0.686057	1
cg12373771	0.686703	1
cg15422307	0.707348	1
cg22016859	0.716446	1
cg00021762	0.7185	1
cg06660057	0.723227	1
cg06128142	0.724957	1
cg19343530	0.733398	1
cg12977135	0.737025	1
cg21355793	0.748861	1
cg23022057	0.749284	1
cg03842205	0.752039	1
cg26328951	0.776226	1
cg12451155	0.780452	1
cg06955716	0.79106	1
cg15103195	0.791075	1
cg22876153	0.792211	1
cg20017995	0.799945	1
cg23344241	0.804631	1
cg20005760	0.80606	1
cg01155404	0.810826	1
cg12575511	0.815731	1
cg02094337	0.838882	1
cg05901613	0.844141	1
cg25284213	0.844569	1
cg15557144	0.849014	1
cg02137984	0.862611	1
cg10505658	0.868113	1
cg06748146	0.873037	1
cg13854930	0.884147	1
cg06453088	0.891394	1
cg08374494	0.892104	1
cg26028489	0.894299	1
cg07966572	0.898643	1
cg21632014	0.900916	1
cg05713044	0.905793	1
cg20308540	0.909095	1
cg00743094	0.914359	1
cg24510397	0.918889	1
cg02903756	0.919081	1
cg21186299	0.919999	1
cg08223225	0.926285	1
cg02189888	0.928912	1
cg06313507	0.933488	1
cg26307701	0.938552	1
cg19864002	0.939939	1
cg07735777	0.950043	1
cg14848772	0.951363	1
cg22629266	0.953175	1
cg02993699	0.953313	1
cg02250501	0.965017	1
cg25178784	0.967922	1
cg06319762	0.974748	1
cg22108374	0.990036	1
cg27541691	0.99051	1
cg04368796	0.992722	1
cg05708550	1.0311	1
cg12678507	1.03703	1
cg14737704	1.03784	1
cg22931466	1.03875	1
cg27039821	1.06122	1
cg25410668	1.06453	1
cg23193410	1.07188	1
cg01386314	1.07947	1
cg18424850	1.08054	1
cg01939535	1.0866	1
cg07131274	1.09618	1
cg16139785	1.09844	1
cg08694014	1.10373	1
cg00460776	1.11135	1
cg13893358	1.11614	1
cg14819229	1.1307	1
cg17243289	1.13451	1
cg06340161	1.13746	1
cg06737494	1.13819	1
cg11904435	1.15233	1
cg04743859	1.16746	1
cg17240133	1.17961	1
cg00175153	1.18704	1
cg13816999	1.21035	1
cg10009224	1.21782	1
cg24027320	1.22835	1
cg17120578	1.23277	1
cg27338302	1.23353	1
cg20898773	1.26649	1
cg12807206	1.29454	1
cg19744398	1.29766	1
cg00181419	1.31698	1
cg16580935	1.32555	1
cg07563882	1.33502	1
cg27224971	1.34525	1
cg20063640	1.36366	1
cg27320127	1.37349	1
cg02301019	1.37718	1
cg22376805	1.39057	1
cg17284536	1.41637	1
cg26548187	1.41722	1
cg09864457	1.4183	1
cg19291355	1.41977	1
cg02626307	1.4299	1
cg26522319	1.44887	1
cg20940044	1.44993	1
cg24585690	1.45875	1
cg06182121	1.46238	1
cg10548038	1.47524	1
cg09357795	1.47714	1
cg22836769	1.4915	1
cg15936446	1.49369	1
cg20897936	1.50975	1
cg08904363	1.51584	1
cg26734668	1.52821	1
cg02732508	1.55162	1
cg00624037	1.56516	1
cg11383802	1.59284	1
cg13472359	1.59955	1
cg06212670	1.60903	1
cg17425351	1.62459	1
cg15998686	1.62783	1
cg00252781	1.63517	1
cg13569761	1.63587	1
cg07077735	1.65222	1
cg26546113	1.6716	1
cg23796243	1.68024	1
cg04271792	1.70944	1
cg11435167	1.71499	1
cg08951273	1.72117	1
cg27665659	1.73349	1
cg00345025	1.73988	1
cg13935689	1.74306	1
cg06475223	1.76719	1
cg09813986	1.79983	1
cg07066898	1.8018	1
cg25427880	1.8073	1
cg03545227	1.81155	1
cg26427827	1.81218	1
cg17825770	1.8138	1
cg16626322	1.82668	1
cg04642105	1.84697	1
cg12813724	1.86707	1
cg09665406	1.88147	1
cg13983181	1.89821	1
cg13803765	1.90958	1
cg10477073	1.92194	1
cg22599122	1.93617	1
cg09673570	1.94318	1
cg16489193	1.9526	1
cg12589298	1.9536	1
cg02128483	1.97984	1
cg05169099	2.00602	1
cg26318502	2.03551	1
cg19795722	2.08479	1
cg20078454	2.10795	1
cg04084157	2.12822	1
cg06335143	2.14527	1
cg17954142	2.15094	1
cg21442182	2.15671	1
cg07547549	2.16106	1
cg23575858	2.17647	1
cg04684267	2.19812	1
cg22964621	2.22184	1
cg24406771	2.2757	1
cg24888989	2.28232	1
cg06639320	2.31606	1
cg11817411	2.358	1
cg23854009	2.39063	1
cg18536827	2.40321	1
cg13201172	2.40322	1
cg03972505	2.41342	1
cg18468088	2.45381	1
cg03553786	2.47959	1
cg01247693	2.48344	1
cg15115984	2.49702	1
cg07744216	2.52552	1
cg22322679	2.54126	1
cg14756040	2.54846	1
cg04738827	2.54956	1
cg14911690	2.55762	1
cg04212239	2.58578	1
cg16760712	2.61003	1
cg17486066	2.62215	1
cg21038418	2.72287	1
cg23275972	2.72415	1
cg08622677	2.72598	1
cg20312457	2.72682	1
cg17291767	2.76578	1
cg21150839	2.80094	1
cg01910125	2.84956	1
cg20436707	2.86538	1
cg15288779	2.87606	1
cg22245862	2.8951	1
cg11654118	2.90692	1
cg19273773	3.04981	1
cg10532980	3.10818	1
cg25966649	3.19993	1
cg22331349	3.21821	1
cg26830108	3.24505	1
cg23500537	3.30155	1
cg25090514	3.33046	1
cg26921969	3.3319	1
cg14633456	3.35211	1
cg20119148	3.39053	1
cg21623865	3.39065	1
cg07589899	3.51216	1
cg02331561	3.56927	1
cg16909962	3.61415	1
cg14044216	3.76045	1
cg01912040	3.8278	1
cg08318076	3.8661	1
cg26792755	3.87808	1
cg12678562	3.98008	1
cg08097417	4.07951	1
cg03555227	4.23529	1
cg18404335	4.26052	1
cg00702638	4.27358	1
cg01810111	4.3199	1
cg14676592	4.45777	1
cg02895699	4.67521	1
cg13783238	4.69085	1
cg07570470	4.70742	1
cg22454769	4.73503	1
cg21572722	4.73733	1
cg25478614	4.90671	1
cg03036557	5.38357	1
cg11071401	6.18549	1
cg22736354	6.27812	1
cg23995914	6.38998	1
cg06458239	6.71336	1
cg04880546	6.88729	1
cg10729426	6.90456	1
cg07303143	7.81212	1
cg23606718	8.27098	1
cg16867657	12.0291	1
cg14447810	-6.03061	2
cg26279371	-5.53041	2
cg17554182	-5.21508	2
cg14255824	-4.78077	2
cg18738985	-4.67513	2
cg19937878	-4.47808	2
cg21787249	-4.19462	2
cg22654656	-4.09307	2
cg27658391	-3.98035	2
cg06030846	-3.97712	2
cg01512113	-3.92809	2
cg26711406	-3.86607	2
cg08568298	-3.66646	2
cg12076692	-3.63766	2
cg06508005	-3.61128	2
cg04437845	-3.55846	2
cg20025677	-3.54316	2
cg22658311	-3.50908	2
cg03370704	-3.50871	2
cg26283098	-3.46904	2
cg05638500	-3.45067	2
cg00241281	-3.44109	2
cg03503871	-3.39672	2
cg04845871	-3.38452	2
cg01071511	-3.38312	2
cg07028415	-3.27038	2
cg18729787	-3.22575	2
cg12002710	-3.15074	2
cg23999833	-3.03643	2
cg12032049	-2.95446	2
cg08520742	-2.95182	2
cg21622381	-2.94565	2
cg11463380	-2.93968	2
cg03539717	-2.93045	2
cg01410314	-2.90745	2
cg13043300	-2.88178	2
cg22340475	-2.8691	2
cg05031801	-2.86599	2
cg08216943	-2.83998	2
cg10564791	-2.83886	2
cg01153946	-2.77804	2
cg13753460	-2.72729	2
cg10021411	-2.70939	2
cg18276125	-2.66144	2
cg00584026	-2.65032	2
cg20167471	-2.63482	2
cg16373176	-2.63202	2
cg20599086	-2.59604	2
cg25264630	-2.55028	2
cg23855818	-2.50747	2
cg10207362	-2.45085	2
cg10234511	-2.44332	2
cg06539449	-2.44009	2
cg24027742	-2.42811	2
cg21089789	-2.42513	2
cg20544516	-2.41729	2
cg20490900	-2.40225	2
cg22329027	-2.40178	2
cg06062998	-2.35595	2
cg06922393	-2.3205	2
cg06973176	-2.2461	2
cg12864581	-2.21536	2
cg23586440	-2.19715	2
cg22622425	-2.16185	2
cg12763813	-2.1593	2
cg27179571	-2.10407	2
cg13818276	-2.07247	2
cg11064738	-2.04357	2
cg16002887	-2.02957	2
cg06413794	-2.01019	2
cg11403598	-2.00356	2
cg23367683	-1.98618	2
cg08231664	-1.96977	2
cg16143325	-1.96216	2
cg03303325	-1.94236	2
cg09445967	-1.93822	2
cg06915470	-1.92563	2
cg20689661	-1.92349	2
cg17080740	-1.8801	2
cg03366992	-1.79268	2
cg23436042	-1.78304	2
cg08767838	-1.76462	2
cg26066433	-1.74637	2
cg14364926	-1.74598	2
cg16058485	-1.74154	2
cg18625289	-1.73835	2
cg09868882	-1.72411	2
cg20837354	-1.70078	2
cg00667298	-1.69556	2
cg05522415	-1.67161	2
cg05813616	-1.66665	2
cg13261106	-1.64218	2
cg20308403	-1.64067	2
cg04322596	-1.62835	2
cg10804687	-1.62197	2
cg07168930	-1.61085	2
cg00786909	-1.60105	2
cg13007207	-1.59409	2
cg23264016	-1.59039	2
cg26605700	-1.55723	2
cg01010923	-1.55348	2
cg07993350	-1.54344	2
cg18845578	-1.54164	2
cg01667185	-1.53687	2
cg17180088	-1.51998	2
cg09746086	-1.51781	2
cg04881751	-1.50104	2
cg15345907	-1.49807	2
cg06739752	-1.47989	2
cg07224469	-1.47507	2
cg23314364	-1.46642	2
cg25188724	-1.45212	2
cg14237301	-1.41248	2
cg04682699	-1.39093	2
cg00028336	-1.34673	2
cg06430772	-1.33128	2
cg04177015	-1.33058	2
cg15471073	-1.32941	2
cg16490191	-1.32359	2
cg23104816	-1.31831	2
cg20382028	-1.29832	2
cg24105287	-1.2915	2
cg09429847	-1.28929	2
cg08827700	-1.28514	2
cg26182780	-1.28387	2
cg00728585	-1.28065	2
cg10200001	-1.27276	2
cg16552881	-1.25484	2
cg18784113	-1.242	2
cg15777261	-1.23579	2
cg13389146	-1.23509	2
cg24314434	-1.22333	2
cg07477924	-1.20976	2
cg05031424	-1.19085	2
cg14578500	-1.16392	2
cg12262181	-1.1634	2
cg16262215	-1.15115	2
cg11615607	-1.13539	2
cg23507761	-1.13157	2
cg26568075	-1.11649	2
cg27545630	-1.07628	2
cg15086820	-1.0722	2
cg24204847	-1.07113	2
cg01431482	-1.06947	2
cg19516374	-1.05781	2
cg05767015	-1.04645	2
cg26518431	-1.03277	2
cg17265115	-1.02244	2
cg01140247	-1.01852	2
cg07099121	-1.01183	2
cg26913669	-1.00891	2
cg07936585	-0.998169	2
cg03657791	-0.969176	2
cg03610636	-0.968394	2
cg01044580	-0.947875	2
cg02735684	-0.930491	2
cg04645070	-0.910033	2
cg05238606	-0.877559	2
cg02858808	-0.876893	2
cg03495084	-0.871224	2
cg13224583	-0.865382	2
cg01765641	-0.86059	2
cg04965094	-0.859132	2
cg19851222	-0.841633	2
cg13970540	-0.836928	2
cg01154248	-0.832187	2
cg17022393	-0.823277	2
cg21520772	-0.816506	2
cg10929582	-0.81148	2
cg26933107	-0.797914	2
cg06191348	-0.795504	2
cg00387551	-0.792795	2
cg11337915	-0.783221	2
cg27011829	-0.781681	2
cg12807237	-0.780278	2
cg13845105	-0.771075	2
cg26195652	-0.770587	2
cg25865120	-0.767948	2
cg06166915	-0.765923	2
cg10192641	-0.756943	2
cg10317815	-0.713753	2
cg02583228	-0.710342	2
cg24170085	-0.703208	2
cg15733049	-0.682195	2
cg18725544	-0.669091	2
cg14590214	-0.665776	2
cg04326566	-0.662062	2
cg01692482	-0.648746	2
cg03900492	-0.623988	2
cg19736226	-0.621772	2
cg19996418	-0.620362	2
cg01710607	-0.614912	2
cg07268240	-0.599151	2
cg10006887	-0.595516	2
cg14871225	-0.594601	2
cg26140475	-0.592216	2
cg01890836	-0.587532	2
cg23907852	-0.572716	2
cg09730123	-0.570676	2
cg23239690	-0.567209	2
cg00741992	-0.550687	2
cg00458351	-0.538695	2
cg05539847	-0.518934	2
cg04684152	-0.512376	2
cg02458141	-0.49997	2
cg23479065	-0.492042	2
cg25575532	-0.484083	2
cg14279035	-0.473738	2
cg02404377	-0.472837	2
cg03092482	-0.463028	2
cg01430430	-0.459182	2
cg11956467	-0.451232	2
cg22029284	-0.444897	2
cg05961176	-0.443798	2
cg05202073	-0.429337	2
cg11464885	-0.408392	2
cg07461273	-0.396832	2
cg17233806	-0.39575	2
cg02951274	-0.376893	2
cg14111380	-0.370981	2
cg07665115	-0.354897	2
cg16668397	-0.327079	2
cg20732137	-0.325128	2
cg14003611	-0.32139	2
cg12309348	-0.304119	2
cg02376097	-0.302229	2
cg11923914	-0.30207	2
cg04436083	-0.300078	2
cg27451587	-0.297609	2
cg19832832	-0.271321	2
cg17566735	-0.264149	2
cg21727223	-0.261006	2
cg26776924	-0.243736	2
cg10296867	-0.242546	2
cg01014113	-0.216519	2
cg25319233	-0.205232	2
cg23240477	-0.202623	2
cg00529757	-0.201318	2
cg25634000	-0.197674	2
cg05537316	-0.189345	2
cg20941823	-0.179168	2
cg16164923	-0.176378	2
cg02751838	-0.1747	2
cg24607283	-0.172273	2
cg05640731	-0.164353	2
cg07719077	-0.162377	2
cg08343600	-0.161933	2
cg16839815	-0.156068	2
cg20663495	-0.150278	2
cg10545250	-0.142901	2
cg18086520	-0.138146	2
cg25636481	-0.12488	2
cg03588966	-0.124282	2
cg04622775	-0.122682	2
cg24570912	-0.122558	2
cg24723690	-0.122469	2
cg06078335	-0.120091	2
cg18749411	-0.120055	2
cg02337695	-0.105164	2
cg10824677	-0.0985005	2
cg12019475	-0.0802385	2
cg26330304	-0.070752	2
cg08024169	-0.0678637	2
cg26638341	-0.0634096	2
cg14023774	-0.0344521	2
cg07568015	-0.0339658	2
cg14505299	-0.027004	2
cg13801740	-0.0238316	2
cg27391127	-0.0144349	2
cg03020208	-0.0067225	2
cg11344073	-0.00651177	2
cg06617217	-7.61651e-05	2
cg07339155	0.000604029	2
cg10917910	0.00293528	2
cg11526073	0.00367917	2
cg15619794	0.00604087	2
cg12026891	0.0144038	2
cg18366882	0.0181549	2
cg12983839	0.0198758	2
cg10161194	0.0322855	2
cg26627327	0.0334893	2
cg09774649	0.0352606	2
cg14184729	0.0366337	2
cg24315710	0.0425786	2
cg12514868	0.0434011	2
cg05525368	0.0526604	2
cg07066898	0.0558107	2
cg21105175	0.0594961	2
cg17802216	0.0668385	2
cg15623062	0.069755	2
cg02202502	0.0733597	2
cg07966572	0.07534	2
cg06669056	0.0779471	2
cg18468088	0.0806938	2
cg08367318	0.0868187	2
cg25690537	0.0877457	2
cg03661054	0.0945667	2
cg24616382	0.0959253	2
cg14288335	0.101715	2
cg01868791	0.10445	2
cg03842205	0.113102	2
cg25284213	0.113634	2
cg12678562	0.113959	2
cg11904435	0.116293	2
cg01329687	0.144824	2
cg07547549	0.153232	2
cg03702686	0.16232	2
cg19744398	0.167197	2
cg07077735	0.193593	2
cg11149849	0.193909	2
cg22796923	0.19864	2
cg17152322	0.205292	2
cg11599721	0.226486	2
cg00818822	0.23084	2
cg08622677	0.260276	2
cg13816999	0.276658	2
cg25245569	0.280751	2
cg02626307	0.297811	2
cg00090787	0.300616	2
cg03036557	0.301997	2
cg05240982	0.306136	2
cg12451155	0.306478	2
cg25427880	0.314262	2
cg10774647	0.316891	2
cg06639320	0.32244	2
cg17243289	0.325324	2
cg17352276	0.326453	2
cg11818438	0.335646	2
cg21855910	0.336169	2
cg22930390	0.338123	2
cg20308540	0.341241	2
cg03570232	0.346183	2
cg26866474	0.354143	2
cg22909935	0.354769	2
cg15970457	0.357425	2
cg19908207	0.367403	2
cg12731325	0.369831	2
cg21623865	0.375777	2
cg22838685	0.379221	2
cg07196505	0.385484	2
cg04212239	0.395806	2
cg20017995	0.410489	2
cg02094337	0.415677	2
cg22331349	0.427652	2
cg19742341	0.429336	2
cg22912214	0.433229	2
cg19094872	0.460836	2
cg07220650	0.469106	2
cg05558539	0.469997	2
cg01933709	0.470212	2
cg04065767	0.471846	2
cg11811840	0.473027	2
cg08983186	0.481653	2
cg20666186	0.485698	2
cg14544225	0.495175	2
cg26921969	0.514331	2
cg04945634	0.520555	2
cg16559361	0.526965	2
cg15422307	0.537143	2
cg15561453	0.539892	2
cg00345025	0.544533	2
cg24358467	0.578007	2
cg26884787	0.583358	2
cg02566157	0.586911	2
cg13599835	0.595076	2
cg03406993	0.604931	2
cg06748146	0.608684	2
cg11933290	0.619725	2
cg23022057	0.628116	2
cg25580076	0.629803	2
cg06621425	0.631628	2
cg00021762	0.65853	2
cg09576649	0.676904	2
cg09864457	0.689724	2
cg04117455	0.690248	2
cg22876153	0.735527	2
cg14006649	0.744361	2
cg00633969	0.74844	2
cg11267480	0.757789	2
cg11383802	0.773057	2
cg05637113	0.776066	2
cg01845501	0.785697	2
cg20005760	0.790344	2
cg21230565	0.819552	2
cg00483825	0.821187	2
cg25876227	0.829538	2
cg13935689	0.830284	2
cg06475223	0.830363	2
cg26328951	0.84283	2
cg19410796	0.853113	2
cg11888359	0.859652	2
cg23800169	0.865792	2
cg08491437	0.868482	2
cg18982384	0.8734	2
cg21834048	0.877147	2
cg13771219	0.879923	2
cg13449372	0.882267	2
cg14737704	0.90396	2
cg03594801	0.928044	2
cg08374494	0.939266	2
cg11177223	0.940597	2
cg08097417	0.950788	2
cg23344241	0.953039	2
cg06555661	0.972448	2
cg06660057	0.977249	2
cg21196551	0.985678	2
cg06637032	0.994025	2
cg27426151	0.997297	2
cg03576555	1.00703	2
cg24459227	1.01097	2
cg20063640	1.02483	2
cg18671115	1.03255	2
cg06313507	1.05188	2
cg23423191	1.06371	2
cg00175153	1.06542	2
cg03043671	1.07988	2
cg11789371	1.09578	2
cg18424850	1.10166	2
cg09813986	1.10495	2
cg21293117	1.11571	2
cg12575511	1.1213	2
cg06212670	1.12238	2
cg22212250	1.12747	2
cg13893358	1.13308	2
cg06340161	1.1491	2
cg10048490	1.16262	2
cg15028232	1.16405	2
cg01939535	1.16726	2
cg06319762	1.17601	2
cg21355793	1.17912	2
cg25178784	1.18004	2
cg13472359	1.19138	2
cg10009224	1.21299	2
cg10534359	1.22343	2
cg20119148	1.22652	2
cg01810111	1.2345	2
cg04743859	1.24255	2
cg11788425	1.2672	2
cg14386870	1.28856	2
cg06128142	1.29363	2
cg02903756	1.29494	2
cg03289072	1.30537	2
cg17240133	1.3135	2
cg13854930	1.31812	2
cg26307701	1.32059	2
cg27338302	1.32324	2
cg07131274	1.39511	2
cg16580935	1.39799	2
cg12807206	1.40001	2
cg06458239	1.40832	2
cg24585690	1.48066	2
cg24510397	1.4893	2
cg21700723	1.49551	2
cg02137984	1.499	2
cg23386779	1.50719	2
cg03555227	1.50812	2
cg05901613	1.51056	2
cg25478614	1.55479	2
cg26028489	1.57758	2
cg21632014	1.6292	2
cg07563882	1.69005	2
cg16626322	1.71785	2
cg02993699	1.77231	2
cg23606718	1.77563	2
cg04738827	1.78821	2
cg22454769	1.79965	2
cg23674189	1.8106	2
cg14614689	1.8306	2
cg13569761	1.83861	2
cg16446346	1.89679	2
cg26546113	1.90141	2
cg21442182	1.90522	2
cg17825770	1.90747	2
cg27224971	1.91948	2
cg04880546	1.92161	2
cg19864002	1.92537	2
cg02250501	1.94602	2
cg13803765	1.94972	2
cg20312457	1.97471	2
cg11435167	1.98623	2
cg27039821	2.0086	2
cg22629266	2.0138	2
cg06955716	2.01431	2
cg00181419	2.01862	2
cg22836769	2.02208	2
cg22931466	2.03342	2
cg13300521	2.03631	2
cg10729426	2.05607	2
cg17284536	2.07463	2
cg01831657	2.11039	2
cg05713044	2.11768	2
cg22736354	2.1673	2
cg04642105	2.24204	2
cg12165943	2.2474	2
cg22376805	2.2734	2
cg10532980	2.33242	2
cg02262037	2.34593	2
cg20898773	2.35413	2
cg09862914	2.37798	2
cg17120578	2.43767	2
cg22322679	2.45905	2
cg09673570	2.46578	2
cg08951273	2.49162	2
cg07303143	2.51352	2
cg11817411	2.52546	2
cg14555736	2.57603	2
cg11071401	2.58365	2
cg13983181	2.58741	2
cg10477073	2.62135	2
cg22245862	2.64152	2
cg21572722	2.67567	2
cg22599122	2.67661	2
cg01912040	2.70585	2
cg23995914	2.74116	2
cg07589899	2.74459	2
cg05169099	2.81413	2
cg02128483	2.82898	2
cg21038418	2.83331	2
cg14819229	2.85246	2
cg14676592	2.8607	2
cg17954142	2.91863	2
cg26427827	2.92343	2
cg23500537	2.92835	2
cg13201172	2.99499	2
cg26548187	3.06579	2
cg11654118	3.08763	2
cg02911270	3.31905	2
cg24406771	3.31955	2
cg00624037	3.34108	2
cg21150839	3.35364	2
cg19795722	3.42924	2
cg14756040	3.43791	2
cg15115984	3.44854	2
cg26318502	3.45146	2
cg20940044	3.49601	2
cg23275972	3.5028	2
cg20078454	3.83327	2
cg01910125	3.8877	2
cg23575858	3.95101	2
cg01247693	4.11023	2
cg15288779	4.23308	2
cg17486066	4.29502	2
cg07744216	4.40579	2
cg16760712	4.54989	2
cg20436707	4.58099	2
cg13783238	4.78441	2
cg14044216	5.40819	2
cg18404335	6.09601	2
cg16867657	12.0048	2

## Sheet: Supplementary Table 6
Gene	logFC	pvals	Group enriched
WIF1	-2.67316	0.0200026	EAA>0
AREG-1	-2.62541	0.0225938	EAA>0
GABRP	-2.47092	0.0105693	EAA>0
FIGF	-2.41029	0.0155876	EAA>0
FABP4	-2.38871	0.0403734	EAA>0
ACTG2	-2.24805	0.00296624	EAA>0
AREG	-2.22357	0.0176746	EAA>0
MIR145	-2.1612	0.0137206	EAA>0
KRT17	-2.14945	0.00218877	EAA>0
KRT5	-2.14704	0.0120539	EAA>0
PGR	-2.01344	0.0105693	EAA>0
SFRP1	-1.95788	0.0254719	EAA>0
CRYAB	-1.94468	0.0105693	EAA>0
SLC7A2	-1.94261	0.0120539	EAA>0
PTHLH	-1.93815	0.0137206	EAA>0
NTRK2	-1.91817	0.00807883	EAA>0
KRT14	-1.89575	0.0092495	EAA>0
CAPN6	-1.8873	0.00612734	EAA>0
LAMC2	-1.8782	0.00296624	EAA>0
KRT17P2	-1.86974	0.000709704	EAA>0
FMO2	-1.81896	0.0120539	EAA>0
OXTR	-1.80989	0.00255054	EAA>0
OR5P3	-1.75735	0.0155876	EAA>0
TRIM29	-1.75067	0.00807883	EAA>0
KIT	-1.70106	0.0225938	EAA>0
STC2	-1.69375	0.0105693	EAA>0
OR5P1P	-1.6839	0.0200026	EAA>0
ANXA3	-1.67395	0.0155876	EAA>0
IGSF10	-1.67214	0.0120539	EAA>0
C2orf40	-1.66245	0.00398832	EAA>0
TP63	-1.65291	0.00612734	EAA>0
TNS4	-1.64621	0.0137206	EAA>0
FAM83B	-1.64349	0.0200026	EAA>0
SERPINB5	-1.62502	0.0105693	EAA>0
SYNM	-1.62077	0.0092495	EAA>0
MET	-1.57346	0.0155876	EAA>0
MYH11	-1.5551	0.0254719	EAA>0
KRT6A	-1.55418	0.00461107	EAA>0
GPM6B	-1.55024	0.0092495	EAA>0
PCDHB3	-1.54408	0.000709704	EAA>0
KLK6	-1.52924	0.00612734	EAA>0
ADAMTS5	-1.51958	0.00704261	EAA>0
DNAJC12	-1.51446	0.0450869	EAA>0
ITGB8	-1.50672	0.0137206	EAA>0
DCX	-1.50295	0.000356894	EAA>0
PDE1C	-1.48061	0.00296624	EAA>0
LIFR	-1.47735	0.00704261	EAA>0
CNTNAP3B-4	-1.45133	0.0450869	EAA>0
CNTNAP3B-2	-1.45133	0.0450869	EAA>0
RBBP8	-1.44791	0.00296624	EAA>0
TM4SF1	-1.44492	0.00255054	EAA>0
HCAR1	-1.44373	0.00160236	EAA>0
MAMDC2	-1.43344	0.0105693	EAA>0
KLK7	-1.42572	0.00160236	EAA>0
ABCA8	-1.42449	0.0450869	EAA>0
KRT17P2-1	-1.42327	0.0011638	EAA>0
CDH3	-1.42212	0.0137206	EAA>0
ABCA9	-1.42178	0.0254719	EAA>0
OVCH2	-1.41231	0.0200026	EAA>0
DSC3	-1.41112	0.028662	EAA>0
BRINP1	-1.40488	0.00296624	EAA>0
AMIGO2	-1.38781	0.00532061	EAA>0
ABCA10	-1.38766	0.0155876	EAA>0
RELN	-1.3749	0.00704261	EAA>0
PIK3C2G	-1.37151	0.0360846	EAA>0
MYBPC1	-1.37021	0.0321904	EAA>0
WLS	-1.36762	0.00255054	EAA>0
S100B	-1.36144	0.0105693	EAA>0
CNTNAP3B-1	-1.36084	0.0360846	EAA>0
SORBS2	-1.35975	0.00344291	EAA>0
ABCA6	-1.35944	0.0360846	EAA>0
CNTNAP3B-3	-1.34791	0.0360846	EAA>0
SYTL5	-1.3478	0.0155876	EAA>0
TSHZ2-1	-1.34304	0.0360846	EAA>0
LAMA3	-1.31079	0.00461107	EAA>0
PAMR1	-1.31036	0.00296624	EAA>0
SORBS1	-1.31002	0.00807883	EAA>0
PDK4	-1.30581	0.0403734	EAA>0
DSG3	-1.3036	0.0360846	EAA>0
SLC7A3	-1.29762	0.000208688	EAA>0
HPSE2	-1.29656	0.0092495	EAA>0
PLIN4	-1.27574	0.0360846	EAA>0
PI16	-1.26909	0.0403734	EAA>0
ZNF334	-1.2576	0.000709704	EAA>0
RNU6-943P	-1.25749	0.0120539	EAA>0
SPRY2	-1.25175	0.0155876	EAA>0
LAMB3	-1.24743	0.00532061	EAA>0
FAT2	-1.24544	0.00704261	EAA>0
MME	-1.23914	0.0450869	EAA>0
CX3CL1	-1.23405	0.0321904	EAA>0
DMD	-1.22936	0.0321904	EAA>0
TSHZ2	-1.22677	0.0225938	EAA>0
LPL	-1.22545	0.028662	EAA>0
NOVA1	-1.21672	0.0450869	EAA>0
EDNRB	-1.21623	0.0120539	EAA>0
TFAP2C	-1.21244	0.0360846	EAA>0
FREM1	-1.2085	0.00255054	EAA>0
TENM2	-1.20311	0.00398832	EAA>0
NDUFC2-KCTD14	-1.20035	0.028662	EAA>0
GRIK3	-1.18468	0.00218877	EAA>0
ALPL	-1.17958	0.0321904	EAA>0
PLEKHH2	-1.17738	0.0105693	EAA>0
GPX2	-1.17408	0.0321904	EAA>0
SYNPO2	-1.17122	0.0155876	EAA>0
EGFR	-1.1513	0.0225938	EAA>0
PRKAA2	-1.14006	0.00461107	EAA>0
CTNND2	-1.13624	0.00532061	EAA>0
CNN1	-1.12824	0.0450869	EAA>0
ITM2A	-1.12106	0.0321904	EAA>0
CHPT1	-1.12055	0.00136694	EAA>0
KRT6B	-1.11705	0.0176746	EAA>0
SHC4	-1.11663	0.0450869	EAA>0
-2634	-1.11472	0.00461107	EAA>0
-2352	-1.10203	0.0360846	EAA>0
DTNA	-1.09842	0.00612734	EAA>0
RN7SL745P	-1.09832	0.0137206	EAA>0
B3GALT1	-1.09429	0.00612734	EAA>0
SLC27A6	-1.0941	0.0092495	EAA>0
GRAMD3	-1.08921	0.0254719	EAA>0
DLK1	-1.08482	0.000144468	EAA>0
RASSF6	-1.07934	0.0403734	EAA>0
-7739	-1.07515	0.00461107	EAA>0
KLK5	-1.07265	0.00807883	EAA>0
COL17A1	-1.07249	0.00296624	EAA>0
DSG2	-1.07144	0.00296624	EAA>0
LOC93432	-1.06266	0.000838576	EAA>0
HSPA4L	-1.06018	0.0176746	EAA>0
WEE1-1	-1.05204	0.00255054	EAA>0
RIC3	-1.05039	0.0403734	EAA>0
AGTR1	-1.04717	0.0105693	EAA>0
NRXN3	-1.04507	0.00255054	EAA>0
TACSTD2	-1.04438	0.00807883	EAA>0
IL17RD	-1.03876	0.0321904	EAA>0
CHST9	-1.03728	0.0403734	EAA>0
DCDC2	-1.03503	0.0225938	EAA>0
SAMD5	-1.02369	0.0155876	EAA>0
BARX2	-1.02095	0.0225938	EAA>0
ITGA2	-1.01432	0.0092495	EAA>0
ARHGAP29	-1.01389	0.0092495	EAA>0
RNF39	-1.01296	0.0105693	EAA>0
RNF39-1	-1.01296	0.0105693	EAA>0
GRP	-1.0108	0.0403734	EAA>0
KRT81	-1.00867	0.00296624	EAA>0
SMYD1	-1.00402	0.000988878	EAA>0
WEE1-2	-1.00354	0.00344291	EAA>0
CEMIP	1.00129	0.0011638	EAA<0
SYNDIG1	1.00607	0.0092495	EAA<0
EPSTI1	1.00972	0.0092495	EAA<0
LILRB4	1.01653	0.0176746	EAA<0
GJB2	1.01873	0.0105693	EAA<0
SLC1A3	1.02518	0.0176746	EAA<0
DDIT4	1.03017	0.0120539	EAA<0
CTHRC1	1.03175	0.00704261	EAA<0
-4189	1.0487	0.0225938	EAA<0
SLC24A2	1.0514	0.0092495	EAA<0
TMEM45A	1.05847	0.0450869	EAA<0
PPEF1	1.06002	0.0176746	EAA<0
COL12A1	1.07179	0.0225938	EAA<0
PYDC1	1.07305	0.0011638	EAA<0
RGS4	1.07954	0.0225938	EAA<0
CST2	1.08669	0.0200026	EAA<0
SLC4A8	1.09047	0.0450869	EAA<0
IFI44	1.09882	0.0176746	EAA<0
C2	1.10374	0.00532061	EAA<0
MFAP2	1.10447	0.00461107	EAA<0
C2-2	1.1151	0.00398832	EAA<0
C2-1	1.1151	0.00398832	EAA<0
SULF1	1.12061	0.0105693	EAA<0
ANKRD22	1.12359	0.0200026	EAA<0
MS4A14	1.14605	0.00532061	EAA<0
IL18	1.1477	0.0120539	EAA<0
GPRC5A	1.14801	0.0360846	EAA<0
COL1A2	1.15247	0.0254719	EAA<0
BGN	1.15407	0.00532061	EAA<0
OAS2	1.15508	0.00704261	EAA<0
RNU6-1283P	1.15613	0.0321904	EAA<0
FCGR3A	1.15981	0.00398832	EAA<0
CXCL17	1.16783	0.0137206	EAA<0
RUNX2	1.23109	0.00807883	EAA<0
OLFML2B	1.238	0.0105693	EAA<0
WISP1	1.26819	0.00612734	EAA<0
IFI44L	1.28457	0.0360846	EAA<0
GBP5	1.2957	0.0155876	EAA<0
COL11A1	1.30818	0.0360846	EAA<0
GREM1	1.31775	0.00807883	EAA<0
TDO2	1.33836	0.00187461	EAA<0
COL10A1	1.34266	0.0450869	EAA<0
FCGR1A-1	1.34435	0.00296624	EAA<0
CXCL11	1.36589	0.0225938	EAA<0
COMP	1.37163	0.0120539	EAA<0
COL1A1	1.37169	0.0176746	EAA<0
COL8A1	1.38191	0.0120539	EAA<0
SYT1	1.38607	0.0450869	EAA<0
RSAD2	1.38626	0.00612734	EAA<0
FCGR1A-2	1.38646	0.00296624	EAA<0
FCGR3A-1	1.4422	0.00704261	EAA<0
FN1	1.46897	0.00807883	EAA<0
FAP	1.5545	0.0200026	EAA<0
OLR1	1.5651	0.0092495	EAA<0
PPAPDC1A	1.61153	0.0105693	EAA<0
MMP11	1.65863	0.0155876	EAA<0
CST1	1.70353	0.0450869	EAA<0
FCGR1A	1.71111	0.00344291	EAA<0
INHBA	1.79126	0.0105693	EAA<0
FNDC1	1.81737	0.00532061	EAA<0
LRRC15	1.83752	0.00612734	EAA<0
CXCL10	1.89673	0.0321904	EAA<0
KCNE4	2.08084	0.000599439	EAA<0
CEACAM6	2.10177	0.0403734	EAA<0
RNU6-813P	2.51711	0.0137206	EAA<0
CYP2B6	2.66464	0.00344291	EAA<0
CYP4Z1	2.81367	0.0450869	EAA<0
CYP2B7P	3.64418	0.00398832	EAA<0
CLEC3A	3.73016	0.00704261	EAA<0

## Sheet: Supplementary Table 7
Probe_name	pvals_Tumor_adjacent	pvals_adj_Tumor_adjacent	pvals_Tumor	pvals_adj_Tumor
cg01154248	2.07061e-64	1.65441e-61	3.22279e-119	2.57501e-116
cg01765641	2.62886e-62	2.10046e-59	9.68701e-54	7.73992e-51
cg27658391	1.21106e-59	9.67633e-57	2.61602e-154	2.0902e-151
cg01044580	4.85758e-59	3.88121e-56	3.73748e-130	2.98625e-127
cg20543092	9.56232e-59	7.64029e-56	4.21526e-133	3.36799e-130
cg04436083	9.72237e-59	7.76817e-56	5.65289e-80	4.51666e-77
cg07568015	1.60286e-57	1.28069e-54	2.09974e-57	1.6777e-54
cg10534359	2.22199e-55	1.77537e-52	9.87395e-89	7.88929e-86
cg15970457	4.61863e-55	3.69028e-52	2.41942e-45	1.93312e-42
cg05637113	4.71226e-55	3.7651e-52	1.08626e-24	8.67923e-22
cg21700723	5.16794e-55	4.12918e-52	9.32173e-57	7.44806e-54
cg20080282	6.06736e-55	4.84782e-52	3.73896e-121	2.98743e-118
cg20308403	1.66991e-54	1.33426e-51	3.60704e-102	2.88202e-99
cg12983839	2.50869e-54	2.00444e-51	5.15145e-147	4.11601e-144
cg19410796	6.34025e-54	5.06586e-51	1.9426e-59	1.55213e-56
cg13599835	7.00194e-54	5.59455e-51	1.53588e-80	1.22717e-77
cg26866474	1.29456e-53	1.03435e-50	7.35153e-92	5.87387e-89
cg06078335	1.15406e-52	9.22091e-50	8.83263e-52	7.05727e-49
cg05537316	1.46596e-52	1.1713e-49	2.2323e-24	1.78361e-21
cg21520772	1.47749e-52	1.18052e-49	4.93798e-20	3.94544e-17
cg19864002	1.81847e-52	1.45296e-49	2.28614e-26	1.82663e-23
cg02094337	2.5761e-52	2.0583e-49	1.20552e-77	9.63207e-75
cg11933290	1.16883e-51	9.33896e-49	9.05325e-15	7.23355e-12
cg23586440	3.30311e-51	2.63918e-48	2.56625e-95	2.05043e-92
cg09868882	4.88008e-51	3.89918e-48	0.0685274	1
cg04881751	1.25429e-50	1.00218e-47	1.4907e-75	1.19107e-72
cg08231664	2.01952e-50	1.6136e-47	1.07303e-76	8.57353e-74
cg05202073	4.7622e-50	3.805e-47	1.0331e-41	8.25445e-39
cg12165943	4.79875e-50	3.8342e-47	1.2482e-114	9.97314e-112
cg06555661	1.08572e-49	8.67489e-47	1.1556e-68	9.23326e-66
cg13854930	1.96511e-49	1.57012e-46	3.53602e-41	2.82528e-38
cg21399778	2.4031e-49	1.92007e-46	7.81044e-22	6.24054e-19
cg18493314	5.42552e-49	4.33499e-46	1.74678e-130	1.39567e-127
cg24701662	6.16951e-49	4.92944e-46	3.17501e-60	2.53683e-57
cg20689661	1.70078e-48	1.35893e-45	1.13857e-112	9.09718e-110
cg23423191	1.79948e-48	1.43778e-45	2.83884e-162	2.26823e-159
cg06739752	1.99171e-48	1.59137e-45	1.00851e-12	8.05799e-10
cg17954142	2.3409e-48	1.87038e-45	3.40368e-60	2.71954e-57
cg25966649	4.18641e-48	3.34494e-45	1.63658e-05	0.0130763
cg00728585	6.98902e-48	5.58423e-45	3.82893e-49	3.05932e-46
cg15619794	4.00267e-47	3.19814e-44	1.0686e-45	8.53812e-43
cg26307701	9.94063e-47	7.94257e-44	0.53615	1
cg03341233	1.19097e-46	9.51586e-44	8.50683e-92	6.79696e-89
cg19736226	1.77277e-46	1.41645e-43	1.04569e-164	8.3551e-162
cg08223225	1.94355e-46	1.5529e-43	2.14345e-90	1.71262e-87
cg12763813	2.42317e-46	1.93611e-43	6.07003e-53	4.84995e-50
cg10021411	3.20309e-46	2.55927e-43	1.18795e-54	9.4917e-52
cg21632014	3.28642e-46	2.62585e-43	2.16024e-10	1.72603e-07
cg15563355	4.14041e-46	3.30819e-43	1.57316e-95	1.25695e-92
cg07665115	1.01417e-45	8.10323e-43	4.66981e-06	0.00373118
cg21442182	1.11507e-45	8.90938e-43	1.74384e-12	1.39333e-09
cg09746086	2.10116e-45	1.67883e-42	1.65009e-41	1.31842e-38
cg20953047	2.48347e-45	1.98429e-42	3.18416e-89	2.54415e-86
cg10729426	3.06558e-45	2.4494e-42	2.04957e-118	1.6376e-115
cg13007207	4.15714e-45	3.32155e-42	2.13038e-12	1.70217e-09
cg11526073	6.55908e-45	5.2407e-42	3.54499e-52	2.83245e-49
cg07614623	7.5246e-45	6.01215e-42	1.59926e-16	1.27781e-13
cg17352276	3.78524e-44	3.02441e-41	6.06201e-20	4.84354e-17
cg11463380	4.72636e-44	3.77636e-41	7.02287e-28	5.61127e-25
cg17152322	9.15432e-44	7.3143e-41	4.48653e-44	3.58474e-41
cg20599086	1.04455e-43	8.34597e-41	0.00719761	1
cg11923914	2.12064e-43	1.69439e-40	3.43251e-49	2.74258e-46
cg04023742	3.02403e-43	2.4162e-40	2.16125e-42	1.72684e-39
cg01939535	4.29422e-43	3.43108e-40	1.65515e-34	1.32246e-31
cg10200001	5.55914e-43	4.44176e-40	1.79683e-58	1.43567e-55
cg01430430	7.80241e-43	6.23413e-40	5.19381e-33	4.14986e-30
cg22876153	1.74727e-42	1.39607e-39	4.44322e-105	3.55013e-102
cg10234511	2.3964e-42	1.91473e-39	4.47867e-137	3.57846e-134
cg12977135	4.69341e-42	3.75003e-39	9.19941e-64	7.35033e-61
cg07131274	4.72633e-42	3.77634e-39	5.09368e-10	4.06985e-07
cg06955716	4.8944e-42	3.91062e-39	7.41567e-19	5.92512e-16
cg23104816	6.01419e-42	4.80534e-39	2.23032e-63	1.78203e-60
cg06660057	6.12006e-42	4.88993e-39	2.10179e-40	1.67933e-37
cg17233806	7.08575e-42	5.66151e-39	3.80084e-55	3.03687e-52
cg25876227	8.43472e-42	6.73934e-39	3.97099e-46	3.17282e-43
cg26568075	8.82546e-42	7.05154e-39	2.91458e-110	2.32875e-107
cg17022393	1.45634e-41	1.16362e-38	1.47414e-85	1.17783e-82
cg12262181	1.97654e-41	1.57926e-38	4.00528e-91	3.20022e-88
cg04117455	2.13321e-41	1.70443e-38	3.47683e-128	2.77799e-125
cg20852557	4.80876e-41	3.8422e-38	2.04438e-126	1.63346e-123
cg00458351	7.52729e-41	6.01431e-38	7.23455e-30	5.7804e-27
cg04322596	7.60544e-41	6.07674e-38	2.81773e-79	2.25136e-76
cg13893358	9.81025e-41	7.83839e-38	2.53543e-26	2.02581e-23
cg26318502	1.47113e-40	1.17544e-37	1.8333e-41	1.46481e-38
cg23855818	1.62495e-40	1.29833e-37	1.77404e-30	1.41746e-27
cg03043671	1.90236e-40	1.51999e-37	2.54229e-76	2.03129e-73
cg22912214	2.10817e-40	1.68443e-37	2.23765e-80	1.78788e-77
cg12231584	2.21165e-40	1.76711e-37	5.62489e-163	4.49428e-160
cg05726118	2.33611e-40	1.86655e-37	9.00369e-12	7.19395e-09
cg06015142	2.75283e-40	2.19951e-37	5.91537e-30	4.72638e-27
cg25575532	3.32185e-40	2.65416e-37	6.0189e-22	4.8091e-19
cg05949889	5.05315e-40	4.03747e-37	1.14943e-06	0.000918398
cg11177223	5.55872e-40	4.44142e-37	2.30126e-143	1.83871e-140
cg01512113	7.70535e-40	6.15658e-37	1.43727e-118	1.14838e-115
cg12076692	1.13465e-39	9.06587e-37	1.83946e-119	1.46973e-116
cg04326566	1.34875e-39	1.07766e-36	3.76356e-24	3.00708e-21
cg17825770	1.57076e-39	1.25504e-36	1.01025e-05	0.00807191
cg26627327	1.77424e-39	1.41761e-36	9.6862e-144	7.73928e-141
cg08946658	2.16586e-39	1.73052e-36	2.30886e-124	1.84478e-121
cg25319233	2.49593e-39	1.99425e-36	6.58381e-159	5.26046e-156
cg10048490	4.00138e-39	3.1971e-36	8.72444e-94	6.97083e-91
cg19701014	4.0693e-39	3.25137e-36	5.27212e-193	4.21242e-190
cg03570232	4.2228e-39	3.37401e-36	7.57746e-16	6.05439e-13
cg14590214	7.18117e-39	5.73775e-36	5.33833e-37	4.26533e-34
cg00818822	9.6778e-39	7.73256e-36	7.91508e-62	6.32415e-59
cg07168930	1.28196e-38	1.02428e-35	5.50636e-86	4.39958e-83
cg01140247	3.18646e-38	2.54598e-35	8.70226e-16	6.9531e-13
cg07268240	3.40562e-38	2.72109e-35	5.83971e-10	4.66593e-07
cg02301019	4.10222e-38	3.27767e-35	1.89338e-14	1.51281e-11
cg18086520	4.63843e-38	3.70611e-35	5.35571e-49	4.27921e-46
cg07224469	5.10694e-38	4.08045e-35	5.77363e-153	4.61313e-150
cg05813616	6.72411e-38	5.37256e-35	2.37572e-17	1.8982e-14
cg23022057	9.86924e-38	7.88552e-35	4.82806e-05	0.0385762
cg01868791	1.35492e-37	1.08258e-34	1.14706e-50	9.16498e-48
cg22964621	1.88986e-37	1.50999e-34	1.24295e-13	9.93114e-11
cg26330304	2.03175e-37	1.62336e-34	8.4797e-24	6.77528e-21
cg01410314	2.07225e-37	1.65573e-34	2.8237e-50	2.25614e-47
cg21537049	2.31739e-37	1.85159e-34	3.41656e-08	2.72984e-05
cg13340085	2.40271e-37	1.91977e-34	1.78597e-67	1.42699e-64
cg22629266	2.90697e-37	2.32267e-34	1.51371e-17	1.20946e-14
cg26028489	3.0337e-37	2.42393e-34	3.1571e-84	2.52252e-81
cg27224971	5.20922e-37	4.16216e-34	9.74727e-45	7.78807e-42
cg24616382	7.93975e-37	6.34386e-34	0.0411413	1
cg21355793	1.07166e-36	8.56255e-34	3.95654e-58	3.16128e-55
cg01710607	1.56294e-36	1.24879e-33	9.9166e-06	0.00792336
cg10317815	3.90997e-36	3.12407e-33	0.00498082	1
cg14288335	4.01235e-36	3.20586e-33	6.22307e-52	4.97223e-49
cg08568298	4.18441e-36	3.34335e-33	1.36063e-61	1.08715e-58
cg05031801	4.53618e-36	3.62441e-33	2.1253e-82	1.69811e-79
cg08739115	5.01343e-36	4.00573e-33	5.61277e-07	0.000448461
cg05713044	6.57234e-36	5.2513e-33	1.83644e-64	1.46732e-61
cg04945634	7.10034e-36	5.67317e-33	8.78188e-25	7.01672e-22
cg26195652	8.61203e-36	6.88101e-33	6.84832e-141	5.4718e-138
cg05522415	8.92201e-36	7.12869e-33	1.85546e-100	1.48251e-97
cg02137984	1.42551e-35	1.13898e-32	4.0029e-06	0.00319832
cg16446346	1.63081e-35	1.30301e-32	3.11434e-105	2.48836e-102
cg09489470	1.71652e-35	1.3715e-32	2.4773e-05	0.0197936
cg09673570	1.93845e-35	1.54882e-32	2.94277e-156	2.35128e-153
cg24406771	2.00786e-35	1.60428e-32	1.65212e-21	1.32005e-18
cg25245569	2.44785e-35	1.95584e-32	0.000190003	0.151812
cg21834048	3.20036e-35	2.55709e-32	5.44605e-16	4.35139e-13
cg23240477	3.38936e-35	2.7081e-32	9.91716e-41	7.92381e-38
cg16552881	3.88697e-35	3.10569e-32	4.10417e-83	3.27923e-80
cg10545250	7.48e-35	5.97652e-32	4.07983e-69	3.25978e-66
cg26913669	8.46425e-35	6.76294e-32	1.78798e-19	1.4286e-16
cg24607283	9.94786e-35	7.94834e-32	0.647196	1
cg00786909	1.53386e-34	1.22555e-31	1.02397e-124	8.18153e-122
cg11956467	1.71294e-34	1.36864e-31	1.15297e-63	9.2122e-61
cg11615607	1.84179e-34	1.47159e-31	3.29542e-71	2.63304e-68
cg18536827	1.95545e-34	1.56241e-31	0.00811144	1
cg24895178	2.26033e-34	1.806e-31	1.01835e-13	8.13661e-11
cg20666186	2.54745e-34	2.03542e-31	1.12025e-128	8.95083e-126
cg08951273	2.74718e-34	2.19499e-31	1.93321e-139	1.54464e-136
cg02566157	3.23485e-34	2.58465e-31	5.79751e-71	4.63221e-68
cg23674189	5.04967e-34	4.03469e-31	1.63931e-65	1.30981e-62
cg11818438	5.99822e-34	4.79258e-31	7.35341e-52	5.87538e-49
cg01845501	6.11185e-34	4.88337e-31	0.0128214	1
cg06915470	6.38537e-34	5.10191e-31	1.83409e-08	1.46544e-05
cg26182780	7.03506e-34	5.62101e-31	1.14191e-16	9.12383e-14
cg02337695	1.2105e-33	9.67189e-31	1.71389e-96	1.3694e-93
cg13231680	1.35401e-33	1.08186e-30	0.0254386	1
cg17265115	1.69894e-33	1.35745e-30	1.09966e-142	8.7863e-140
cg24027742	3.07136e-33	2.45402e-30	2.41718e-164	1.93133e-161
cg08173649	3.92095e-33	3.13284e-30	2.40834e-27	1.92426e-24
cg16139785	4.06898e-33	3.25112e-30	3.02664e-82	2.41829e-79
cg03503871	6.0012e-33	4.79496e-30	1.10802e-149	8.85312e-147
cg01014113	6.15089e-33	4.91456e-30	1.2288e-28	9.81814e-26
cg13472359	8.36617e-33	6.68457e-30	7.83614e-78	6.26108e-75
cg04437845	9.51809e-33	7.60495e-30	2.08719e-53	1.66767e-50
cg15733049	9.57671e-33	7.65179e-30	2.48383e-127	1.98458e-124
cg11435167	1.07282e-32	8.57183e-30	8.73006e-20	6.97532e-17
cg16143325	1.49819e-32	1.19706e-29	9.48961e-07	0.00075822
cg02911270	1.53063e-32	1.22298e-29	0.833544	1
cg15561453	1.58787e-32	1.26871e-29	6.63526e-186	5.30157e-183
cg00345025	1.72456e-32	1.37792e-29	0.652353	1
cg06062998	1.76186e-32	1.40773e-29	3.92443e-38	3.13562e-35
cg07744216	1.77266e-32	1.41636e-29	6.20831e-64	4.96044e-61
cg07993350	2.37652e-32	1.89884e-29	0.800659	1
cg05901613	2.81039e-32	2.2455e-29	3.88892e-63	3.10725e-60
cg09329097	2.81897e-32	2.25235e-29	0.16895	1
cg18729787	3.49922e-32	2.79587e-29	1.54422e-18	1.23383e-15
cg04885315	3.62931e-32	2.89982e-29	2.78041e-111	2.22155e-108
cg11811840	4.5446e-32	3.63113e-29	1.50618e-10	1.20344e-07
cg22838685	5.19394e-32	4.14996e-29	6.43774e-14	5.14375e-11
cg13845105	5.74067e-32	4.58679e-29	0.227264	1
cg06191348	6.3445e-32	5.06925e-29	7.32267e-39	5.85081e-36
cg21293117	6.59932e-32	5.27286e-29	1.57428e-05	0.0125785
cg07719077	6.70001e-32	5.35331e-29	1.25459e-23	1.00242e-20
cg14375747	7.13985e-32	5.70474e-29	0.880063	1
cg14237301	7.60835e-32	6.07907e-29	3.54826e-145	2.83506e-142
cg01912040	1.58405e-31	1.26566e-28	5.21978e-108	4.1706e-105
cg02626307	1.63737e-31	1.30826e-28	3.48812e-17	2.787e-14
cg09862914	1.75468e-31	1.40199e-28	7.17832e-11	5.73548e-08
cg25188724	1.85227e-31	1.47996e-28	1.75086e-68	1.39893e-65
cg08526705	1.87468e-31	1.49787e-28	3.53359e-97	2.82334e-94
cg25410668	2.00886e-31	1.60508e-28	2.89491e-117	2.31304e-114
cg06430772	2.87103e-31	2.29396e-28	0.587814	1
cg10009224	3.86152e-31	3.08535e-28	8.3332e-60	6.65823e-57
cg01071511	3.95501e-31	3.16005e-28	1.07614e-74	8.59836e-72
cg18404335	4.2365e-31	3.38497e-28	8.0761e-124	6.4528e-121
cg09813986	4.4706e-31	3.57201e-28	1.09919e-15	8.78254e-13
cg10192641	4.99288e-31	3.98931e-28	1.1673e-57	9.32669e-55
cg27545630	5.03779e-31	4.02519e-28	3.64299e-08	2.91075e-05
cg20382028	5.33168e-31	4.26001e-28	4.57623e-49	3.6564e-46
cg22796923	5.46046e-31	4.36291e-28	1.35635e-58	1.08372e-55
cg17554182	6.22595e-31	4.97453e-28	3.98309e-21	3.18248e-18
cg19742341	8.38481e-31	6.69946e-28	1.34292e-90	1.07299e-87
cg10929582	9.64186e-31	7.70385e-28	8.07232e-15	6.44978e-12
cg03303325	9.78613e-31	7.81912e-28	1.1214e-22	8.95997e-20
cg13771219	9.90309e-31	7.91257e-28	1.8012e-41	1.43916e-38
cg00180930	1.1556e-30	9.23323e-28	4.73391e-36	3.78239e-33
cg19908207	1.16939e-30	9.34345e-28	6.63534e-19	5.30164e-16
cg10296867	1.36431e-30	1.09009e-27	6.62117e-32	5.29031e-29
cg20941823	1.81804e-30	1.45262e-27	0.0783204	1
cg06669056	2.68448e-30	2.1449e-27	0.154635	1
cg24314434	2.87277e-30	2.29535e-27	0.324352	1
cg08140609	3.23198e-30	2.58235e-27	3.01696e-12	2.41055e-09
cg15288779	3.61439e-30	2.88789e-27	3.15501e-27	2.52086e-24
cg23532985	4.61288e-30	3.68569e-27	8.09379e-08	6.46694e-05
cg24510397	4.66737e-30	3.72923e-27	9.75542e-139	7.79458e-136
cg11599721	4.70866e-30	3.76222e-27	9.16816e-45	7.32536e-42
cg20063640	6.20329e-30	4.95643e-27	2.32868e-30	1.86061e-27
cg22322679	6.46297e-30	5.16391e-27	5.98686e-08	4.7835e-05
cg02858808	6.75317e-30	5.39579e-27	2.31018e-17	1.84583e-14
cg00021762	6.96398e-30	5.56422e-27	1.40664e-56	1.12391e-53
cg20005760	7.65874e-30	6.11933e-27	1.30581e-06	0.00104334
cg21038418	1.72271e-29	1.37645e-26	6.61594e-19	5.28614e-16
cg17425351	1.79948e-29	1.43778e-26	0.00324721	1
cg17112707	2.21146e-29	1.76696e-26	0.00880594	1
cg23479065	2.77254e-29	2.21526e-26	2.96042e-68	2.36537e-65
cg24459227	3.10393e-29	2.48004e-26	2.55563e-151	2.04195e-148
cg13389146	3.2416e-29	2.59004e-26	1.06017e-13	8.47073e-11
cg05961176	3.27932e-29	2.62018e-26	4.43882e-11	3.54662e-08
cg22931466	4.19237e-29	3.3497e-26	1.17512e-135	9.38925e-133
cg09609051	4.39053e-29	3.50803e-26	1.2656e-53	1.01122e-50
cg21805880	4.4415e-29	3.54876e-26	1.66024e-99	1.32653e-96
cg13943358	4.67825e-29	3.73792e-26	2.94048e-67	2.34944e-64
cg17240133	5.18996e-29	4.14678e-26	1.12775e-39	9.0107e-37
cg20436707	6.6674e-29	5.32725e-26	3.53387e-06	0.00282356
cg03661054	9.22451e-29	7.37039e-26	2.28386e-13	1.82481e-10
cg00387551	1.36191e-28	1.08817e-25	2.14649e-32	1.71505e-29
cg18671115	1.47123e-28	1.17551e-25	0.436761	1
cg06313507	1.54007e-28	1.23051e-25	0.0306558	1
cg27052183	1.62134e-28	1.29545e-25	1.91177e-154	1.5275e-151
cg20312457	1.79174e-28	1.4316e-25	8.04971e-100	6.43172e-97
cg07196505	1.97425e-28	1.57743e-25	7.11201e-102	5.6825e-99
cg10804687	2.10206e-28	1.67954e-25	0.000176168	0.140758
cg14044216	2.59523e-28	2.07359e-25	0.00361696	1
cg18234606	3.20297e-28	2.55917e-25	1.81039e-12	1.4465e-09
cg10207362	3.34238e-28	2.67056e-25	7.57727e-32	6.05424e-29
cg06748146	3.70202e-28	2.95792e-25	0.779842	1
cg07028415	3.79777e-28	3.03442e-25	2.41326e-19	1.92819e-16
cg21196551	4.76437e-28	3.80674e-25	2.77915e-47	2.22054e-44
cg08767838	1.26427e-27	1.01015e-24	0.361564	1
cg19060970	1.98013e-27	1.58212e-24	1.29412e-166	1.034e-163
cg18725544	2.15351e-27	1.72066e-24	0.00107526	0.859132
cg14578500	2.79251e-27	2.23122e-24	0.083473	1
cg10774647	2.80814e-27	2.2437e-24	3.80861e-25	3.04308e-22
cg06545359	2.81599e-27	2.24997e-24	9.99441e-53	7.98553e-50
cg00601711	3.4517e-27	2.75791e-24	1.76986e-25	1.41412e-22
cg10006887	3.66982e-27	2.93219e-24	0.000200848	0.160478
cg14111380	4.57188e-27	3.65293e-24	5.95119e-64	4.755e-61
cg11904435	6.22173e-27	4.97116e-24	3.4028e-155	2.71883e-152
cg14544225	9.42304e-27	7.52901e-24	9.84767e-37	7.86829e-34
cg16373176	1.02936e-26	8.22462e-24	5.74587e-130	4.59095e-127
cg11817411	1.11821e-26	8.93447e-24	1.5785e-88	1.26122e-85
cg24570912	1.64425e-26	1.31375e-23	6.04774e-36	4.83214e-33
cg08983186	1.87607e-26	1.49898e-23	5.95977e-86	4.76186e-83
cg03837111	3.49356e-26	2.79135e-23	1.776e-136	1.41903e-133
cg17291767	3.62973e-26	2.90015e-23	2.07152e-58	1.65514e-55
cg04642105	3.78146e-26	3.02139e-23	2.06598e-31	1.65071e-28
cg20732137	7.26719e-26	5.80649e-23	1.61879e-21	1.29341e-18
cg15422307	7.90486e-26	6.31598e-23	4.68587e-57	3.74401e-54
cg22212250	7.94785e-26	6.35033e-23	3.06081e-63	2.44559e-60
cg19122460	8.71523e-26	6.96346e-23	4.74223e-68	3.78904e-65
cg03078672	9.55598e-26	7.63522e-23	0.00635005	1
cg09357795	1.06485e-25	8.50814e-23	1.95366e-89	1.56097e-86
cg25580076	1.11194e-25	8.88438e-23	1.5565e-47	1.24365e-44
cg15086820	1.15171e-25	9.20218e-23	1.83497e-49	1.46614e-46
cg14184729	1.15483e-25	9.22709e-23	6.57188e-58	5.25093e-55
cg03092482	1.28316e-25	1.02524e-22	0.451952	1
cg12063018	1.4567e-25	1.1639e-22	0.0511185	1
cg05525368	1.56672e-25	1.25181e-22	0.120173	1
cg05240712	1.58798e-25	1.26879e-22	3.90103e-84	3.11692e-81
cg14514991	1.81693e-25	1.45173e-22	3.31262e-08	2.64679e-05
cg23800169	2.14095e-25	1.71062e-22	3.61177e-57	2.88581e-54
cg04682699	2.3711e-25	1.8945e-22	2.41888e-07	0.000193268
cg08827700	2.45533e-25	1.96181e-22	5.12343e-06	0.00409362
cg06442489	3.15085e-25	2.51753e-22	7.38583e-112	5.90128e-109
cg06539449	3.95563e-25	3.16055e-22	3.35641e-24	2.68177e-21
cg01667185	4.29728e-25	3.43353e-22	6.35281e-06	0.0050759
cg08343600	4.37839e-25	3.49833e-22	3.06035e-43	2.44522e-40
cg03702686	4.63091e-25	3.7001e-22	3.15686e-07	0.000252233
cg14003611	4.83295e-25	3.86153e-22	0.711016	1
cg17080740	4.91095e-25	3.92385e-22	6.80208e-36	5.43486e-33
cg06340161	5.08425e-25	4.06231e-22	0.205493	1
cg22599122	7.26431e-25	5.80418e-22	2.07822e-43	1.6605e-40
cg03576555	8.20873e-25	6.55877e-22	4.84809e-12	3.87362e-09
cg07339155	8.25244e-25	6.5937e-22	1.76259e-152	1.40831e-149
cg18276125	1.14952e-24	9.18467e-22	3.11902e-88	2.49209e-85
cg16164923	1.55382e-24	1.2415e-21	2.2038e-36	1.76083e-33
cg14555736	1.70417e-24	1.36163e-21	4.44538e-121	3.55186e-118
cg18831134	1.94938e-24	1.55756e-21	0.165712	1
cg01933709	2.03865e-24	1.62888e-21	3.73433e-115	2.98373e-112
cg14911690	2.26498e-24	1.80972e-21	1.54854e-10	1.23729e-07
cg02903756	2.35612e-24	1.88254e-21	9.62854e-09	7.69321e-06
cg14819229	2.38104e-24	1.90245e-21	6.65298e-34	5.31573e-31
cg03657791	2.88438e-24	2.30462e-21	4.01628e-103	3.20901e-100
cg13833040	3.17841e-24	2.53955e-21	4.6759e-28	3.73604e-25
cg11789371	3.18675e-24	2.54621e-21	0.0137419	1
cg03036557	3.41152e-24	2.7258e-21	1.31673e-19	1.05207e-16
cg06453088	3.6234e-24	2.8951e-21	0.485722	1
cg27179571	3.70981e-24	2.96414e-21	2.10042e-111	1.67824e-108
cg25634000	4.37461e-24	3.49531e-21	7.47599e-160	5.97331e-157
cg13970540	4.69445e-24	3.75087e-21	4.1683e-19	3.33047e-16
cg06617217	5.06381e-24	4.04599e-21	1.33226e-34	1.06447e-31
cg04622775	6.5382e-24	5.22402e-21	1.16151e-14	9.28048e-12
cg26279371	7.10621e-24	5.67786e-21	0.00570248	1
cg15028232	9.02599e-24	7.21177e-21	1.14832e-117	9.1751e-115
cg16668397	1.0144e-23	8.10503e-21	3.04921e-85	2.43632e-82
cg18738985	1.01967e-23	8.14717e-21	0.000830712	0.663739
cg22658311	1.35575e-23	1.08324e-20	0.302472	1
cg22108374	1.84823e-23	1.47673e-20	3.96244e-134	3.16599e-131
cg26066433	1.941e-23	1.55086e-20	1.46085e-117	1.16722e-114
cg13826105	2.09157e-23	1.67116e-20	3.70129e-65	2.95733e-62
cg05092960	2.60948e-23	2.08497e-20	2.27026e-80	1.81393e-77
cg05641843	2.61619e-23	2.09034e-20	3.50199e-08	2.79809e-05
cg12428326	2.81852e-23	2.252e-20	8.69904e-138	6.95053e-135
cg22622425	2.96701e-23	2.37064e-20	3.29562e-37	2.6332e-34
cg05031424	3.29605e-23	2.63355e-20	1.09861e-73	8.77793e-71
cg14006649	3.35573e-23	2.68123e-20	6.88393e-30	5.50026e-27
cg00532335	6.86112e-23	5.48204e-20	5.01756e-73	4.00903e-70
cg13096351	8.05337e-23	6.43465e-20	1.54306e-136	1.2329e-133
cg26638341	8.05337e-23	6.43465e-20	1.28098e-33	1.02351e-30
cg27039821	8.75752e-23	6.99726e-20	5.98866e-19	4.78494e-16
cg06508005	9.7672e-23	7.80399e-20	2.78792e-47	2.22755e-44
cg19516374	1.09751e-22	8.76909e-20	2.41295e-28	1.92795e-25
cg10917910	1.15453e-22	9.2247e-20	0.000157832	0.126108
cg07760161	1.19014e-22	9.50923e-20	7.61932e-24	6.08784e-21
cg23436042	1.36778e-22	1.09285e-19	2.71747e-07	0.000217126
cg18861551	1.76499e-22	1.41022e-19	0.126676	1
cg16530128	1.87032e-22	1.49439e-19	2.08867e-17	1.66885e-14
cg08459783	2.00194e-22	1.59955e-19	4.26054e-151	3.40417e-148
cg07966572	2.06853e-22	1.65276e-19	1.97645e-108	1.57919e-105
cg19937878	2.1266e-22	1.69915e-19	3.86443e-71	3.08768e-68
cg00162859	2.1753e-22	1.73806e-19	8.57854e-104	6.85426e-101
cg04065767	2.43588e-22	1.94626e-19	1.76216e-06	0.00140797
cg25865120	2.77564e-22	2.21774e-19	2.61397e-73	2.08856e-70
cg25284213	2.96271e-22	2.3672e-19	1.28177e-39	1.02414e-36
cg09576649	2.96271e-22	2.3672e-19	1.25115e-102	9.9967e-100
cg23606718	3.01517e-22	2.40912e-19	2.95173e-48	2.35843e-45
cg11071401	3.06855e-22	2.45177e-19	3.02527e-114	2.41719e-111
cg13449372	3.47802e-22	2.77894e-19	6.84789e-70	5.47146e-67
cg07563882	4.12289e-22	3.29419e-19	2.15482e-42	1.7217e-39
cg14981819	4.92257e-22	3.93314e-19	1.81201e-17	1.44779e-14
cg11788425	4.95955e-22	3.96268e-19	0.0335473	1
cg22736354	5.30494e-22	4.23865e-19	2.19851e-13	1.75661e-10
cg12575511	5.34476e-22	4.27046e-19	2.05657e-101	1.6432e-98
cg23344241	6.22163e-22	4.97108e-19	0.00177984	1
cg18366882	6.44216e-22	5.14729e-19	3.92228e-07	0.00031339
cg02404377	6.55531e-22	5.23769e-19	2.15258e-14	1.71991e-11
cg22376805	7.62832e-22	6.09503e-19	1.21919e-12	9.74134e-10
cg01910125	7.72362e-22	6.17117e-19	2.58875e-58	2.06841e-55
cg26711406	1.37837e-21	1.10132e-18	5.1138e-172	4.08593e-169
cg06637032	1.76793e-21	1.41258e-18	3.70801e-130	2.9627e-127
cg12019475	2.11032e-21	1.68615e-18	1.15789e-23	9.25158e-21
cg08520742	2.53678e-21	2.02688e-18	6.60391e-86	5.27652e-83
cg02128483	3.06325e-21	2.44754e-18	3.90177e-114	3.11751e-111
cg05703211	3.17773e-21	2.53901e-18	4.57125e-43	3.65243e-40
cg21787249	3.36977e-21	2.69245e-18	5.06403e-83	4.04616e-80
cg11654118	3.53854e-21	2.82729e-18	1.3881e-49	1.10909e-46
cg03972505	3.83547e-21	3.06454e-18	1.90829e-29	1.52472e-26
cg16002887	3.94944e-21	3.1556e-18	7.82464e-05	0.0625189
cg00529757	4.10663e-21	3.2812e-18	1.72885e-91	1.38135e-88
cg22331349	4.96611e-21	3.96792e-18	1.6814e-83	1.34343e-80
cg10824677	4.99034e-21	3.98728e-18	1.5853e-10	1.26665e-07
cg26518431	5.48693e-21	4.38405e-18	2.12327e-86	1.69649e-83
cg05558539	5.88758e-21	4.70417e-18	2.3976e-173	1.91569e-170
cg13201172	6.92723e-21	5.53485e-18	2.56583e-90	2.0501e-87
cg27426151	8.24731e-21	6.5896e-18	4.95965e-37	3.96276e-34
cg26268968	8.63531e-21	6.89962e-18	7.81938e-07	0.000624768
cg13753460	9.93491e-21	7.938e-18	7.69885e-45	6.15138e-42
cg21089789	1.10215e-20	8.80622e-18	9.93874e-62	7.94105e-59
cg25478614	1.13179e-20	9.04301e-18	2.85374e-185	2.28014e-182
cg00181419	1.2645e-20	1.01033e-17	5.26661e-40	4.20802e-37
cg17120578	1.37237e-20	1.09652e-17	1.81622e-46	1.45116e-43
cg26427827	1.50011e-20	1.19859e-17	9.15086e-19	7.31154e-16
cg16262215	1.76204e-20	1.40787e-17	1.09169e-52	8.72257e-50
cg07099121	1.81787e-20	1.45248e-17	1.28749e-14	1.0287e-11
cg02376097	1.85309e-20	1.48062e-17	0.218407	1
cg13803765	1.93947e-20	1.54964e-17	8.2915e-159	6.62491e-156
cg17180088	2.24461e-20	1.79344e-17	0.372519	1
cg02402882	2.54186e-20	2.03095e-17	4.35273e-24	3.47783e-21
cg14505299	2.63462e-20	2.10506e-17	1.1178e-56	8.93124e-54
cg11337915	4.28341e-20	3.42244e-17	0.0779899	1
cg20898773	4.71019e-20	3.76344e-17	7.31442e-24	5.84422e-21
cg12981876	5.13008e-20	4.09894e-17	1.88613e-132	1.50702e-129
cg15998686	5.27811e-20	4.21721e-17	9.82217e-45	7.84791e-42
cg17802216	5.29063e-20	4.22722e-17	9.01898e-71	7.20616e-68
cg22909935	7.92695e-20	6.33363e-17	0.00369433	1
cg06454901	8.93961e-20	7.14275e-17	1.07896e-24	8.6209e-22
cg25636481	9.4594e-20	7.55806e-17	7.34374e-19	5.86765e-16
cg02262037	9.73039e-20	7.77458e-17	1.98676e-52	1.58742e-49
cg12678562	1.09961e-19	8.78588e-17	1.77676e-28	1.41963e-25
cg04258676	1.10479e-19	8.82727e-17	5.86407e-26	4.6854e-23
cg15345907	1.13105e-19	9.03713e-17	2.1079e-40	1.68421e-37
cg05262711	1.20792e-19	9.65131e-17	2.03086e-154	1.62266e-151
cg08111414	1.21646e-19	9.71951e-17	9.51479e-84	7.60232e-81
cg12032049	1.44695e-19	1.15612e-16	1.02838e-44	8.21672e-42
cg23264016	1.46743e-19	1.17248e-16	1.70707e-05	0.0136395
cg16867657	1.47087e-19	1.17523e-16	0.0747123	1
cg09623845	2.30862e-19	1.84458e-16	1.89674e-54	1.5155e-51
cg23796243	2.42998e-19	1.94155e-16	4.09406e-153	3.27115e-150
cg27451587	2.48142e-19	1.98265e-16	2.11498e-08	1.68987e-05
cg07547549	2.49881e-19	1.99655e-16	3.78335e-166	3.02289e-163
cg20119148	2.61783e-19	2.09165e-16	5.87319e-52	4.69268e-49
cg23386779	3.29465e-19	2.63243e-16	2.00419e-107	1.60135e-104
cg23575858	3.32536e-19	2.65696e-16	1.69804e-15	1.35673e-12
cg07220650	3.54839e-19	2.83516e-16	3.09466e-36	2.47263e-33
cg18625289	3.83027e-19	3.06039e-16	8.739e-06	0.00698246
cg10477073	4.06785e-19	3.25021e-16	1.77827e-143	1.42084e-140
cg21622381	4.30004e-19	3.43573e-16	2.13361e-08	1.70476e-05
cg02993699	5.58164e-19	4.45973e-16	4.02906e-114	3.21922e-111
cg23259527	6.78802e-19	5.42363e-16	2.48481e-109	1.98536e-106
cg03588966	7.80916e-19	6.23952e-16	5.49384e-09	4.38958e-06
cg02735684	8.27023e-19	6.60791e-16	1.15475e-35	9.22644e-33
cg13261106	8.28922e-19	6.62309e-16	4.56975e-114	3.65123e-111
cg03406993	1.1317e-18	9.04225e-16	2.63021e-49	2.10154e-46
cg05640731	1.32475e-18	1.05847e-15	1.15872e-25	9.2582e-23
cg19094872	1.3771e-18	1.1003e-15	1.73193e-44	1.38381e-41
cg23907852	1.41528e-18	1.13081e-15	1.35531e-42	1.08289e-39
cg13224583	1.56443e-18	1.24998e-15	3.70235e-42	2.95818e-39
cg18662080	1.59317e-18	1.27294e-15	1.13534e-80	9.07138e-78
cg19851222	2.40243e-18	1.91954e-15	4.61784e-68	3.68966e-65
cg16580935	2.91143e-18	2.32624e-15	1.47215e-13	1.17624e-10
cg09665406	2.99139e-18	2.39012e-15	1.06413e-66	8.50241e-64
cg00090787	3.1154e-18	2.4892e-15	2.1737e-13	1.73679e-10
cg06852243	3.69741e-18	2.95423e-15	0.777012	1
cg11553687	5.71527e-18	4.5665e-15	8.22501e-46	6.57179e-43
cg15557144	6.42029e-18	5.12981e-15	4.64968e-67	3.7151e-64
cg13801740	6.98914e-18	5.58432e-15	0.0050569	1
cg02118776	9.93769e-18	7.94021e-15	5.19245e-94	4.14877e-91
cg14756040	1.12039e-17	8.9519e-15	6.86297e-86	5.48352e-83
cg03539717	1.14553e-17	9.15275e-15	1.26476e-168	1.01054e-165
cg05767015	1.16862e-17	9.3373e-15	2.12246e-33	1.69584e-30
cg20167471	1.23797e-17	9.89135e-15	5.48931e-13	4.38596e-10
cg17864650	1.36166e-17	1.08797e-14	1.17051e-28	9.35238e-26
cg08367318	1.78688e-17	1.42771e-14	0.65839	1
cg01431482	1.97319e-17	1.57658e-14	1.56475e-27	1.25024e-24
cg19996418	1.98627e-17	1.58703e-14	1.87996e-26	1.50209e-23
cg01153946	2.52422e-17	2.01685e-14	0.00130238	1
cg04738827	2.91738e-17	2.33098e-14	2.29729e-17	1.83553e-14
cg26283098	3.75178e-17	2.99767e-14	0.0109166	1
cg18784113	3.7682e-17	3.01079e-14	0.658233	1
cg00028336	3.86823e-17	3.09071e-14	1.26659e-37	1.012e-34
cg07077735	3.97087e-17	3.17272e-14	1.1226e-123	8.96957e-121
cg12373771	4.00567e-17	3.20053e-14	1.13768e-13	9.09006e-11
cg14447810	5.63752e-17	4.50438e-14	7.72004e-60	6.16831e-57
cg06084073	8.63643e-17	6.90051e-14	1.65087e-114	1.31905e-111
cg21572722	9.15458e-17	7.31451e-14	1.52125e-34	1.21548e-31
cg19746343	9.21401e-17	7.362e-14	0.284371	1
cg25427880	9.64082e-17	7.70302e-14	3.29975e-46	2.6365e-43
cg22245862	1.01963e-16	8.14688e-14	7.54799e-66	6.03084e-63
cg25264630	1.1727e-16	9.36988e-14	1.06092e-41	8.47679e-39
cg04880546	1.29728e-16	1.03653e-13	2.84818e-20	2.27569e-17
cg07177395	1.48178e-16	1.18394e-13	0.20375	1
cg14674720	1.55327e-16	1.24106e-13	6.89255e-130	5.50715e-127
cg00741992	1.59028e-16	1.27064e-13	3.34919e-41	2.676e-38
cg13043300	1.7888e-16	1.42925e-13	0.00114932	0.918304
cg26933107	1.96923e-16	1.57341e-13	8.57003e-120	6.84745e-117
cg26328951	2.07267e-16	1.65607e-13	0.00427942	1
cg02049979	2.10833e-16	1.68456e-13	0.000542744	0.433653
cg15115984	2.27643e-16	1.81887e-13	7.64433e-99	6.10782e-96
cg23275972	2.4682e-16	1.97209e-13	2.50194e-15	1.99905e-12
cg01247693	2.76838e-16	2.21194e-13	8.79484e-28	7.02708e-25
cg27338302	2.77427e-16	2.21664e-13	1.06548e-09	8.51317e-07
cg07477924	2.78017e-16	2.22135e-13	6.2637e-84	5.0047e-81
cg02202502	2.91928e-16	2.3325e-13	0.255317	1
cg03594801	2.96296e-16	2.36741e-13	5.2732e-26	4.21328e-23
cg01010923	3.34351e-16	2.67146e-13	0.0192515	1
cg13649056	3.38626e-16	2.70562e-13	6.85142e-104	5.47429e-101
cg18749411	3.48813e-16	2.78702e-13	0.0233953	1
cg21230565	3.75621e-16	3.00121e-13	4.25601e-138	3.40055e-135
cg23239690	3.93501e-16	3.14407e-13	0.233125	1
cg12807206	5.01525e-16	4.00719e-13	2.17217e-61	1.73556e-58
cg10016004	5.05767e-16	4.04108e-13	5.53923e-48	4.42585e-45
cg24315710	6.33321e-16	5.06023e-13	2.22116e-78	1.7747e-75
cg08024169	6.49468e-16	5.18925e-13	4.19038e-07	0.000334812
cg19795722	6.56315e-16	5.24396e-13	2.10409e-73	1.68117e-70
cg15471073	8.29761e-16	6.62979e-13	1.97373e-45	1.57701e-42
cg05169099	8.40231e-16	6.71345e-13	3.0058e-08	2.40163e-05
cg23367683	8.9831e-16	7.1775e-13	1.06477e-07	8.50752e-05
cg03555227	1.08145e-15	8.64081e-13	3.88622e-36	3.10509e-33
cg06648759	1.0905e-15	8.71307e-13	2.69376e-21	2.15232e-18
cg12514868	1.25092e-15	9.99488e-13	5.93158e-27	4.73933e-24
cg02951274	1.34521e-15	1.07482e-12	3.55653e-111	2.84167e-108
cg13818276	1.42861e-15	1.14146e-12	6.89654e-100	5.51034e-97
cg04908961	1.5077e-15	1.20465e-12	0.108002	1
cg16626322	1.56173e-15	1.24782e-12	2.05746e-08	1.64391e-05
cg06568490	2.06842e-15	1.65267e-12	4.80788e-05	0.038415
cg11464885	2.1115e-15	1.68709e-12	6.34155e-39	5.0669e-36
cg13935689	2.78154e-15	2.22245e-12	7.13995e-85	5.70482e-82
cg00483825	2.8334e-15	2.26388e-12	1.2533e-08	1.00138e-05
cg03842205	3.20423e-15	2.56018e-12	2.06136e-21	1.64702e-18
cg04684152	3.49899e-15	2.7957e-12	2.20223e-77	1.75958e-74
cg09774649	3.90721e-15	3.12186e-12	3.13855e-34	2.5077e-31
cg11383802	3.9473e-15	3.15389e-12	1.64511e-24	1.31444e-21
cg13983181	4.38898e-15	3.5068e-12	5.03415e-10	4.02228e-07
cg22654656	5.23918e-15	4.18611e-12	4.10052e-63	3.27632e-60
cg20978460	5.52336e-15	4.41317e-12	0.00155559	1
cg03465682	5.84639e-15	4.67126e-12	2.12421e-09	1.69725e-06
cg15101483	5.84639e-15	4.67126e-12	2.36527e-21	1.88985e-18
cg22329027	5.95411e-15	4.75733e-12	6.4112e-55	5.12255e-52
cg21855910	7.37967e-15	5.89636e-12	3.69226e-55	2.95012e-52
cg12926839	8.24674e-15	6.58914e-12	1.09475e-90	8.74705e-88
cg22836769	8.55171e-15	6.83282e-12	0.870225	1
cg22029284	9.36355e-15	7.48148e-12	1.09083e-28	8.71572e-26
cg11064738	9.80732e-15	7.83605e-12	9.41273e-115	7.52077e-112
cg11344073	1.18939e-14	9.50326e-12	0.00689467	1
cg07936585	1.30691e-14	1.04422e-11	7.37392e-100	5.89176e-97
cg17284536	1.49144e-14	1.19166e-11	5.98686e-08	4.7835e-05
cg14023774	1.58991e-14	1.27034e-11	8.74697e-53	6.98883e-50
cg26605700	1.67461e-14	1.33801e-11	3.67137e-79	2.93343e-76
cg00667298	1.73582e-14	1.38692e-11	5.1417e-54	4.10822e-51
cg02250501	1.76022e-14	1.40642e-11	1.44034e-29	1.15083e-26
cg03545227	1.85383e-14	1.48121e-11	2.3558e-39	1.88229e-36
cg01155404	1.92148e-14	1.53527e-11	2.31411e-21	1.84897e-18
cg05532093	2.33471e-14	1.86544e-11	1.90067e-23	1.51863e-20
cg06030846	2.37678e-14	1.89905e-11	9.3488e-21	7.46969e-18
cg06413794	2.47786e-14	1.97981e-11	2.10945e-14	1.68545e-11
cg02189888	2.52747e-14	2.01945e-11	6.27738e-132	5.01563e-129
cg27011829	2.73044e-14	2.18162e-11	7.21219e-102	5.76254e-99
cg24723690	2.8016e-14	2.23848e-11	8.15738e-11	6.51775e-08
cg15777261	2.90889e-14	2.32421e-11	1.38445e-18	1.10617e-15
cg14614689	2.96698e-14	2.37061e-11	1.00177e-15	8.00417e-13
cg04368796	3.23e-14	2.58077e-11	2.41476e-08	1.92939e-05
cg10745988	3.24278e-14	2.59098e-11	6.54373e-121	5.22844e-118
cg14848772	3.48831e-14	2.78716e-11	2.36192e-05	0.0188718
cg15623062	3.92587e-14	3.13677e-11	4.14929e-59	3.31529e-56
cg14279035	4.40862e-14	3.52249e-11	1.44476e-63	1.15436e-60
cg08491437	4.67601e-14	3.73614e-11	0.0268029	1
cg22340475	4.73138e-14	3.78037e-11	0.00661841	1
cg16490191	4.778e-14	3.81762e-11	2.67789e-08	2.13963e-05
cg24137448	5.04758e-14	4.03302e-11	1.28276e-20	1.02493e-17
cg19744398	5.24924e-14	4.19414e-11	6.79852e-10	5.43202e-07
cg02751838	7.53243e-14	6.01841e-11	3.27052e-29	2.61315e-26
cg03366992	8.41523e-14	6.72377e-11	6.11854e-23	4.88872e-20
cg15857635	8.61364e-14	6.8823e-11	0.00102126	0.815988
cg14364926	9.75211e-14	7.79193e-11	2.74081e-163	2.18991e-160
cg20308540	1.00202e-13	8.00614e-11	5.62831e-104	4.49702e-101
cg08285489	1.08058e-13	8.63384e-11	3.12059e-31	2.49335e-28
cg03900492	1.12319e-13	8.97426e-11	6.141e-93	4.90666e-90
cg06639320	1.3941e-13	1.11388e-10	1.98346e-26	1.58479e-23
cg11267480	1.54079e-13	1.23109e-10	1.18349e-18	9.4561e-16
cg06202426	1.64796e-13	1.31672e-10	1.463e-88	1.16894e-85
cg18982384	2.07004e-13	1.65396e-10	1.62937e-05	0.0130186
cg02732508	2.08992e-13	1.66985e-10	1.00721e-05	0.00804764
cg05638500	2.23022e-13	1.78195e-10	3.16507e-15	2.52889e-12
cg26875852	2.4535e-13	1.96035e-10	2.12821e-54	1.70044e-51
cg01386314	2.50549e-13	2.00189e-10	8.53278e-30	6.81769e-27
cg15936446	2.51027e-13	2.00571e-10	2.82932e-79	2.26062e-76
cg00241281	2.62771e-13	2.09954e-10	1.60964e-88	1.2861e-85
cg19832832	2.7245e-13	2.17688e-10	1.81367e-66	1.44912e-63
cg16839815	3.00766e-13	2.40312e-10	1.29007e-34	1.03077e-31
cg03370704	3.20214e-13	2.55851e-10	1.03163e-82	8.24273e-80
cg12731325	3.44795e-13	2.75491e-10	0.0229415	1
cg04743859	3.62889e-13	2.89948e-10	1.54712e-51	1.23615e-48
cg20940044	3.93647e-13	3.14524e-10	4.38997e-67	3.50759e-64
cg07735777	5.68447e-13	4.54189e-10	1.4239e-101	1.13769e-98
cg14676592	5.91307e-13	4.72454e-10	2.74397e-05	0.0219243
cg12864581	5.96881e-13	4.76908e-10	8.09998e-56	6.47189e-53
cg21105175	7.58525e-13	6.06062e-10	8.62078e-123	6.88801e-120
cg06182121	7.81534e-13	6.24446e-10	6.39053e-05	0.0510603
cg23999833	7.91815e-13	6.3266e-10	4.25037e-49	3.39605e-46
cg04684267	8.26538e-13	6.60404e-10	2.52054e-07	0.000201391
cg27391127	9.00526e-13	7.1952e-10	2.44548e-42	1.95394e-39
cg00175153	1.0825e-12	8.6492e-10	0.104617	1
cg07589899	1.1276e-12	9.00952e-10	1.10298e-16	8.8128e-14
cg11149849	1.47995e-12	1.18248e-09	4.67677e-12	3.73674e-09
cg23193759	1.8023e-12	1.44004e-09	1.2966e-39	1.03599e-36
cg13816999	1.9648e-12	1.56987e-09	9.79848e-31	7.82899e-28
cg08374494	1.9902e-12	1.59017e-09	0.120303	1
cg05238606	2.30016e-12	1.83783e-09	0.000119936	0.0958287
cg24358467	2.3728e-12	1.89587e-09	1.17992e-60	9.42754e-58
cg26776924	2.45218e-12	1.95929e-09	9.34216e-126	7.46439e-123
cg14431361	2.45666e-12	1.96287e-09	2.27211e-105	1.81542e-102
cg22930390	2.57144e-12	2.05458e-09	4.77476e-39	3.81504e-36
cg08622677	3.1536e-12	2.51973e-09	1.50986e-64	1.20638e-61
cg06319762	3.78134e-12	3.02129e-09	0.163469	1
cg03610636	3.78134e-12	3.02129e-09	4.22481e-16	3.37562e-13
cg02583228	3.78819e-12	3.02677e-09	1.17152e-08	9.36044e-06
cg24585690	4.33886e-12	3.46675e-09	0.162586	1
cg01692482	4.41e-12	3.52359e-09	0.163863	1
cg04767507	5.35815e-12	4.28116e-09	3.22055e-17	2.57322e-14
cg09429847	5.6756e-12	4.53481e-09	0.390321	1
cg20078454	7.33448e-12	5.86025e-09	1.96575e-05	0.0157063
cg25690537	8.20819e-12	6.55835e-09	7.54369e-17	6.02741e-14
cg21150839	1.04937e-11	8.38445e-09	0.533008	1
cg22016859	1.08344e-11	8.65666e-09	4.49872e-40	3.59447e-37
cg12807237	1.17967e-11	9.42558e-09	0.303542	1
cg25202261	1.40535e-11	1.12287e-08	1.41172e-32	1.12796e-29
cg15048099	1.45839e-11	1.16526e-08	0.428675	1
cg03339956	1.72088e-11	1.37498e-08	4.78724e-117	3.82501e-114
cg10548038	2.12025e-11	1.69408e-08	1.10232e-60	8.80752e-58
cg16549027	2.45544e-11	1.9619e-08	3.01831e-50	2.41163e-47
cg23995914	2.85721e-11	2.28291e-08	2.41037e-16	1.92589e-13
cg19047670	3.14914e-11	2.51616e-08	4.55655e-12	3.64068e-09
cg00624037	3.20982e-11	2.56464e-08	1.3894e-66	1.11013e-63
cg04582295	3.82983e-11	3.06003e-08	2.03182e-08	1.62342e-05
cg08216943	4.16077e-11	3.32445e-08	0.108026	1
cg10532980	4.33657e-11	3.46492e-08	1.57541e-163	1.25875e-160
cg03020208	6.38059e-11	5.09809e-08	2.0875e-49	1.66791e-46
cg12309348	7.40172e-11	5.91397e-08	2.45376e-12	1.96055e-09
cg06922393	8.00453e-11	6.39562e-08	0.347627	1
cg20025677	8.04547e-11	6.42833e-08	1.77957e-18	1.42188e-15
cg22454769	1.06061e-10	8.47424e-08	4.90495e-13	3.91905e-10
cg26921969	1.0624e-10	8.48858e-08	1.90091e-67	1.51883e-64
cg17490283	1.52559e-10	1.21895e-07	2.20445e-68	1.76135e-65
cg10161194	1.76762e-10	1.41233e-07	2.67412e-13	2.13662e-10
cg12678507	2.03344e-10	1.62472e-07	7.42095e-09	5.92934e-06
cg18159646	2.09878e-10	1.67692e-07	2.54529e-39	2.03369e-36
cg26548187	4.16354e-10	3.32667e-07	1.21536e-12	9.71076e-10
cg25090514	4.37303e-10	3.49405e-07	0.00177132	1
cg26884787	5.27568e-10	4.21527e-07	9.23645e-107	7.37992e-104
cg05105477	6.17637e-10	4.93492e-07	3.07545e-97	2.45728e-94
cg17486066	6.40063e-10	5.1141e-07	1.36071e-62	1.08721e-59
cg06458239	6.76292e-10	5.40357e-07	2.21085e-46	1.76647e-43
cg25590826	8.30171e-10	6.63306e-07	3.59551e-138	2.87281e-135
cg13300521	1.01801e-09	8.13392e-07	4.56701e-16	3.64904e-13
cg07437263	1.11345e-09	8.89649e-07	5.49199e-40	4.3881e-37
cg11888359	1.15329e-09	9.21477e-07	1.39565e-06	0.00111513
cg12451155	1.24906e-09	9.97998e-07	1.26571e-10	1.01131e-07
cg03289072	1.28335e-09	1.0254e-06	9.35923e-26	7.47803e-23
cg21623865	1.32699e-09	1.06026e-06	1.64525e-06	0.00131455
cg12026891	1.33759e-09	1.06873e-06	0.875013	1
cg18845578	1.35042e-09	1.07898e-06	0.000267279	0.213556
cg20837354	1.45515e-09	1.16266e-06	0.00165654	1
cg20663495	1.97146e-09	1.5752e-06	1.5089e-54	1.20561e-51
cg03553786	2.61516e-09	2.08951e-06	4.43236e-61	3.54145e-58
cg00330825	2.66886e-09	2.13242e-06	2.74071e-44	2.18983e-41
cg02895699	3.63806e-09	2.90681e-06	2.8313e-77	2.26221e-74
cg00743094	3.98611e-09	3.1849e-06	8.98168e-94	7.17636e-91
cg04084157	4.94672e-09	3.95243e-06	0.051209	1
cg16559361	5.18012e-09	4.13892e-06	2.79897e-35	2.23638e-32
cg11403598	5.29268e-09	4.22885e-06	1.69225e-07	0.000135211
cg06212670	5.42422e-09	4.33395e-06	9.21129e-10	7.35982e-07
cg06973176	5.85614e-09	4.67906e-06	1.83281e-126	1.46442e-123
cg07066898	6.40893e-09	5.12073e-06	0.000685738	0.547905
cg17110586	8.59523e-09	6.86759e-06	2.28203e-82	1.82334e-79
cg08318076	1.03817e-08	8.29495e-06	1.68e-32	1.34232e-29
cg16058485	1.21568e-08	9.71331e-06	4.70141e-06	0.00375643
cg05539847	1.48991e-08	1.19044e-05	1.28037e-91	1.02301e-88
cg08097417	1.50779e-08	1.20472e-05	0.0215145	1
cg10505658	1.70602e-08	1.36311e-05	0.143342	1
cg06335143	1.99625e-08	1.59501e-05	4.37183e-21	3.49309e-18
cg11965881	2.04705e-08	1.6356e-05	7.41544e-40	5.92494e-37
cg06166915	2.6447e-08	2.11311e-05	0.83168	1
cg07558209	2.74744e-08	2.1952e-05	9.8331e-19	7.85664e-16
cg02331561	3.29792e-08	2.63504e-05	0.0335111	1
cg27320127	3.55719e-08	2.84219e-05	4.51524e-69	3.60768e-66
cg24204847	3.67807e-08	2.93878e-05	1.97923e-73	1.5814e-70
cg23507761	3.86409e-08	3.08741e-05	5.96505e-05	0.0476608
cg09730123	4.15433e-08	3.31931e-05	2.86282e-98	2.28739e-95
cg00584026	4.21486e-08	3.36768e-05	1.67761e-06	0.00134041
cg04965094	4.53058e-08	3.61994e-05	8.6427e-76	6.90552e-73
cg00748589	9.23528e-08	7.37899e-05	1.58283e-71	1.26468e-68
cg13783238	2.52002e-07	0.000201349	8.81236e-30	7.04108e-27
cg00633969	2.69786e-07	0.000215559	8.08914e-21	6.46323e-18
cg07461273	4.20337e-07	0.000335849	4.75883e-72	3.80231e-69
cg01329687	5.28229e-07	0.000422055	2.0163e-79	1.61103e-76
cg07392449	6.07227e-07	0.000485174	6.89271e-19	5.50727e-16
cg14737704	6.72274e-07	0.000537147	1.05167e-127	8.40285e-125
cg09445967	7.32364e-07	0.000585159	5.94609e-06	0.00475093
cg04177015	7.58817e-07	0.000606295	1.61074e-07	0.000128698
cg16909962	7.72894e-07	0.000617542	1.26195e-31	1.0083e-28
cg20897936	8.39412e-07	0.00067069	3.60709e-54	2.88206e-51
cg14386870	9.11425e-07	0.000728229	0.0169175	1
cg00593900	9.88083e-07	0.000789478	5.14612e-84	4.11175e-81
cg23500537	1.02072e-06	0.000815553	1.13477e-08	9.06679e-06
cg26830108	1.02337e-06	0.000817675	0.00202532	1
cg06359056	1.02737e-06	0.000820867	0.484704	1
cg20017995	1.02737e-06	0.000820867	0.363165	1
cg27541691	1.04893e-06	0.000838095	1.16885e-46	9.33912e-44
cg19291355	1.22196e-06	0.000976345	1.01461e-09	8.10672e-07
cg20226327	1.24422e-06	0.000994135	8.00651e-58	6.3972e-55
cg05917988	1.34242e-06	0.00107259	2.442e-10	1.95116e-07
cg26546113	1.40055e-06	0.00111904	0.0213057	1
cg12153480	1.78757e-06	0.00142827	0.0267135	1
cg13460409	2.27631e-06	0.00181877	7.73369e-09	6.17922e-06
cg18424850	2.47016e-06	0.00197365	0.336869	1
cg19273773	4.16689e-06	0.00332935	1.04075e-41	8.31562e-39
cg12002710	4.20288e-06	0.0033581	0.5147	1
cg15103195	4.57953e-06	0.00365905	2.5964e-69	2.07452e-66
cg06621425	7.59651e-06	0.00606961	1.79866e-08	1.43713e-05
cg23998119	9.50413e-06	0.0075938	4.75975e-40	3.80304e-37
cg06737494	9.75518e-06	0.00779439	4.82628e-148	3.8562e-145
cg25178784	1.52487e-05	0.0121837	2.5232e-12	2.01604e-09
cg10564791	1.60652e-05	0.0128361	8.21643e-11	6.56493e-08
cg17243289	4.04651e-05	0.0323316	3.51198e-23	2.80607e-20
cg04212239	4.17375e-05	0.0333482	4.36618e-65	3.48858e-62
cg18569335	7.42253e-05	0.059306	0.562427	1
cg06128142	0.000110228	0.0880719	5.31396e-07	0.000424586
cg14633456	0.000371689	0.296979	3.53034e-43	2.82074e-40
cg01908954	0.000428205	0.342136	3.3047e-138	2.64046e-135
cg09864457	0.000459824	0.367399	1.48189e-50	1.18403e-47
cg07570470	0.0004955	0.395905	5.59803e-19	4.47282e-16
cg18468088	0.000505537	0.403924	9.56928e-22	7.64586e-19
cg11082362	0.00074791	0.59758	2.48742e-38	1.98745e-35
cg10569694	0.0007493	0.598691	0.000810793	0.647824
cg26856080	0.00174716	1	2.00533e-32	1.60226e-29
cg20490900	0.00223381	1	7.80199e-25	6.23379e-22
cg12100751	0.0024034	1	7.93403e-29	6.33929e-26
cg08904363	0.00241771	1	0.0703269	1
cg00252781	0.00303037	1	0.0329902	1
cg05708550	0.00346456	1	0.0522798	1
cg00702638	0.00398365	1	0.176435	1
cg20544516	0.00520586	1	6.18018e-48	4.93796e-45
cg01831657	0.00574874	1	0.00188747	1
cg06475223	0.00643129	1	1.6463e-70	1.3154e-67
cg16760712	0.00714198	1	8.70667e-34	6.95663e-31
cg12813724	0.0183054	1	6.76064e-66	5.40175e-63
cg07303143	0.0253969	1	8.19867e-11	6.55074e-08
cg06121469	0.0262136	1	6.30406e-20	5.03694e-17
cg21186299	0.0358879	1	1.41324e-13	1.12918e-10
cg24888989	0.0519338	1	0.185531	1
cg26522319	0.0578116	1	9.75354e-06	0.00779308
cg13569761	0.173372	1	1.09579e-21	8.7554e-19
cg12589298	0.22726	1	0.00449799	1
cg27665659	0.25475	1	1.76685e-48	1.41172e-45
cg01810111	0.279323	1	1.38885e-11	1.10969e-08
cg24027320	0.425382	1	5.65096e-54	4.51512e-51
cg04271792	0.661048	1	2.07147e-40	1.65511e-37
cg00590036	0.983468	1	1.55266e-11	1.24057e-08
cg26792755	0.886694	1	3.21218e-15	2.56653e-12
cg00460776	0.829259	1	1.00707e-22	8.04649e-20
cg08694014	0.734355	1	6.26261e-26	5.00383e-23
cg19343530	0.553195	1	1.29947e-25	1.03828e-22
cg05228359	0.502708	1	1.28436e-05	0.010262
cg23854009	0.141032	1	8.22469e-10	6.57153e-07
cg05240982	0.138698	1	5.5799e-10	4.45834e-07
cg06530983	0.125251	1	0.00361445	1
cg07078958	0.114185	1	0.498997	1
cg00066663	0.0155638	1	2.40987e-56	1.92548e-53
cg26734668	0.00378162	1	2.54634e-27	2.03452e-24
cg16541852	0.00282534	1	8.45902e-30	6.75876e-27
cg01890836	0.0019896	1	6.16679e-19	4.92727e-16
cg23193410	0.00184867	1	5.04715e-21	4.03267e-18
cg25323057	0.00172597	1	3.50388e-35	2.7996e-32
cg14871225	5.5994e-05	0.0447392	0.000526356	0.420558
cg16022049	1.94969e-05	0.015578	1.93718e-67	1.5478e-64
cg24105287	1.16162e-05	0.00928135	6.77911e-09	5.41651e-06
cg16489193	4.82083e-06	0.00385184	3.36408e-10	2.6879e-07
cg14284211	3.54983e-06	0.00283632	0.000500604	0.399983
cg22273939	2.42711e-06	0.00193926	1.14242e-80	9.1279e-78
cg10981580	1.58172e-06	0.00126379	0.00223346	1
cg02458141	1.38268e-06	0.00110476	4.77296e-36	3.8136e-33
cg01511742	4.90248e-07	0.000391708	4.40396e-15	3.51876e-12
cg24170085	3.78503e-07	0.000302424	0.081251	1
cg01346501	9.43281e-08	7.53682e-05	8.11755e-28	6.48592e-25
cg23314364	7.0952e-08	5.66907e-05	7.63483e-114	6.10023e-111
cg14255824	3.74271e-08	2.99043e-05	1.29559e-78	1.03518e-75
cg26652413	1.82655e-08	1.45942e-05	8.08046e-05	0.0645628
cg01671895	1.78637e-08	1.42731e-05	1.96713e-18	1.57174e-15
cg00085493	8.71318e-09	6.96183e-06	1.43193e-15	1.14411e-12
cg14434062	2.59885e-09	2.07648e-06	5.79859e-19	4.63307e-16
cg04845871	9.09875e-10	7.2699e-07	5.63356e-06	0.00450121
cg03495084	8.76854e-10	7.00606e-07	0.00133678	1
cg07788865	5.81637e-10	4.64728e-07	9.90792e-117	7.91643e-114
cg26140475	5.29289e-10	4.22902e-07	0.848739	1
cg20518446	2.0607e-10	1.6465e-07	6.38394e-84	5.10076e-81
cg11230435	6.18663e-12	4.94312e-09	3.78705e-12	3.02585e-09
cg11342615	1.40281e-12	1.12085e-09	0.00949299	1
cg10784519	1.13629e-13	9.07893e-11	0.241657	1
cg25744613	7.24479e-14	5.78859e-11	2.42397e-71	1.93675e-68
cg10789314	3.8418e-14	3.0696e-11	0.134718	1
cg25467652	2.16073e-14	1.72642e-11	7.16065e-55	5.72136e-52
cg09080114	1.43584e-14	1.14724e-11	1.06908e-12	8.54194e-10
cg04645070	1.1154e-14	8.91202e-12	2.85329e-106	2.27978e-103
cg16894138	4.75798e-16	3.80163e-13	3.62679e-35	2.89781e-32
cg17566735	4.35474e-16	3.47943e-13	3.41595e-05	0.0272935
cg21727223	1.41699e-17	1.13218e-14	0.00709533	1
cg07890839	8.22501e-18	6.57178e-15	1.19196e-10	9.52373e-08
cg02821342	1.18189e-18	9.44334e-16	1.65581e-23	1.32299e-20
cg07220152	5.24475e-19	4.19056e-16	0.214332	1
cg01346152	5.09372e-20	4.06989e-17	8.22977e-20	6.57559e-17
cg24315421	3.04758e-20	2.43502e-17	0.000452586	0.361616
cg17935811	2.91252e-20	2.32711e-17	8.07403e-62	6.45115e-59
cg15571405	1.80483e-20	1.44206e-17	4.53967e-19	3.6272e-16
cg20706495	4.40748e-21	3.52158e-18	1.68498e-44	1.3463e-41
cg27181375	1.32356e-22	1.05752e-19	9.05196e-51	7.23252e-48
cg18825531	4.10201e-27	3.2775e-24	7.66953e-49	6.12795e-46
cg11385003	6.04424e-32	4.82935e-29	0.427283	1
cg07668993	3.44371e-33	2.75152e-30	4.57116e-91	3.65236e-88
cg23558337	5.39284e-34	4.30888e-31	0.00518082	1
cg20143092	3.97942e-34	3.17956e-31	0.727824	1
cg09548403	1.59217e-39	1.27215e-36	0.00269616	1
cg09650907	1.02245e-43	8.16934e-41	1.6423e-07	0.00013122
cg02076355	5.99295e-46	4.78837e-43	0.908823	1
cg13518625	2.55564e-53	2.04196e-50	2.8775e-48	2.29912e-45

## Sheet: Supplementary Table 8
	pval_Healthy	padj_Healthy	r_Healthy	pval_Tumor	padj_Tumor	r_Tumor	pval_Tumor_Adjacent	padj_Tumor_Adjacent	r_Tumor_Adjacent
cg00021762	4.19872e-18	3.35478e-15	0.357384	0.000145715	0.116427	0.113865	0.165515	1	0.0730417
cg00028336	1.08978e-21	8.70731e-19	0.391413	0.0214973	1	0.0690663	0.301765	1	0.0544231
cg00066663	3.74011e-14	2.98835e-11	-0.31441	0.578066	1	-0.0167275	0.0526997	1	-0.101913
cg00085493	3.13172e-20	2.50225e-17	-0.378054	2.74717e-07	0.000219498	-0.153672	1.72438e-10	1.37778e-07	-0.327381
cg00090787	5.05005e-21	4.03499e-18	0.385389	2.80919e-05	0.0224454	0.125473	0.000159131	0.127145	0.197211
cg00162859	4.69866e-18	3.75423e-15	0.356891	0.161261	1	0.0421131	0.00307581	1	0.155171
cg00175153	2.11745e-23	1.69184e-20	0.40635	6.77536e-05	0.0541351	0.119395	9.86094e-06	0.00787889	0.229994
cg00180930	1.7773e-21	1.42006e-18	0.389505	0.000282039	0.225349	0.108889	0.0079288	1	0.139349
cg00181419	4.82037e-24	3.85148e-21	0.411769	0.0647887	1	0.055499	0.117011	1	0.0825278
cg00241281	1.82273e-20	1.45636e-17	0.380249	0.0222993	1	0.0686496	0.255627	1	0.0599017
cg00252781	1.67678e-37	1.33975e-34	0.507298	0.194703	1	0.0389875	8.54008e-08	6.82352e-05	0.276905
cg00330825	1.5042e-17	1.20186e-14	0.351742	1.78515e-06	0.00142633	0.142915	0.00417146	1	0.15024
cg00345025	1.12635e-25	8.99956e-23	0.425097	0.00165399	1	0.0944142	0.724011	1	0.0186215
cg00387551	3.77896e-21	3.01939e-18	0.386538	0.409985	1	0.0247764	0.833648	1	-0.0110767
cg00458351	5.41788e-18	4.32889e-15	0.356266	0.85439	1	-0.0055195	0.731987	1	-0.0180616
cg00460776	2.43999e-36	1.94955e-33	0.500136	0.476621	1	-0.0214041	4.89744e-07	0.000391305	0.260702
cg00483825	7.97451e-21	6.37163e-18	0.38357	0.000103273	0.0825151	0.116381	8.57825e-08	6.85402e-05	0.276865
cg00529757	4.96038e-23	3.96334e-20	0.403187	0.00252019	1	0.0906697	0.91657	1	0.00552488
cg00532335	4.72153e-19	3.7725e-16	0.36679	0.563957	1	-0.0173518	0.126261	1	0.080511
cg00584026	4.82607e-18	3.85603e-15	0.356773	0.0142173	1	0.0736381	4.68291e-05	0.0374164	0.212254
cg00590036	1.63111e-34	1.30326e-31	0.488543	3.67472e-10	2.9361e-07	0.186832	2.86255e-11	2.28718e-08	0.340379
cg00593900	8.09572e-23	6.46848e-20	0.401351	1.06293e-05	0.00849284	0.131875	4.19342e-05	0.0335054	0.21356
cg00601711	8.79479e-26	7.02704e-23	0.425954	1.71251e-05	0.013683	0.128771	8.89185e-08	7.10459e-05	0.276542
cg00624037	1.28453e-21	1.02634e-18	0.390773	0.000700018	0.559314	0.101681	0.769974	1	-0.0154211
cg00633969	5.9373e-20	4.7439e-17	0.375437	0.00097663	0.780327	0.0989226	0.553357	1	0.0312541
cg00667298	7.19325e-21	5.74741e-18	0.383981	1.37817e-05	0.0110116	0.130193	6.74865e-05	0.0539217	0.207872
cg00702638	2.12246e-45	1.69585e-42	0.551887	6.03348e-21	4.82075e-18	0.276858	1.82043e-27	1.45453e-24	0.528775
cg00728585	6.16394e-19	4.92499e-16	0.365659	0.0144416	1	0.0734691	0.00596677	1	0.144258
cg00741992	3.5139e-28	2.80761e-25	0.444478	0.00436412	1	0.0855765	9.47067e-05	0.0756707	0.203726
cg00743094	2.63288e-24	2.10367e-21	0.413955	2.87525e-06	0.00229733	0.140048	2.27338e-06	0.00181643	0.245506
cg00748589	1.18016e-23	9.42949e-21	0.408502	2.52532e-13	2.01773e-10	0.217445	1.84058e-10	1.47063e-07	0.326897
cg00786909	4.36505e-18	3.48767e-15	0.357213	0.000299322	0.239159	0.108431	0.000357227	0.285424	0.18662
cg00818822	1.69774e-17	1.35649e-14	0.351201	0.00166179	1	0.0943731	0.0368256	1	0.109775
cg01010923	1.21131e-19	9.67837e-17	0.372493	0.620398	1	0.0148954	0.872369	1	-0.00847272
cg01014113	2.23178e-20	1.78319e-17	0.37943	0.00381963	1	0.0868362	4.52749e-05	0.0361747	0.212654
cg01044580	5.76081e-23	4.60289e-20	0.402627	0.00175654	1	0.0938873	0.00831865	1	0.138505
cg01071511	1.35281e-23	1.08089e-20	0.408001	1.17597e-06	0.000939599	0.145382	0.000348112	0.278141	0.186968
cg01140247	1.27711e-17	1.02041e-14	0.352472	0.200676	1	0.0384719	0.298646	1	-0.054775
cg01153946	1.03751e-23	8.28968e-21	0.408974	4.89184e-08	3.90858e-05	0.162973	3.54633e-05	0.0283352	0.215527
cg01154248	1.51788e-24	1.21279e-21	0.415933	0.0172744	1	0.0715138	0.00565365	1	0.145173
cg01155404	5.03992e-26	4.0269e-23	0.427874	0.00434552	1	0.0856171	0.0271219	1	0.116151
cg01247693	4.2202e-24	3.37194e-21	0.412251	0.177994	1	0.0404945	0.914561	1	0.0056584
cg01329687	3.29504e-19	2.63274e-16	0.368309	0.000928791	0.742104	0.0993429	6.41937e-09	5.12908e-06	0.299147
cg01346152	4.48511e-17	3.5836e-14	-0.346821	0.389695	1	-0.0258662	0.0335349	1	-0.111756
cg01346501	5.55959e-24	4.44211e-21	-0.411251	0.00165825	1	-0.0943917	0.00334488	1	-0.153827
cg01386314	2.14711e-18	1.71554e-15	0.360304	0.189226	1	0.0394706	0.0295931	1	-0.114362
cg01410314	7.55939e-24	6.03995e-21	0.410132	4.33241e-06	0.0034616	0.137535	0.000907392	0.725006	0.173652
cg01430430	3.11372e-16	2.48786e-13	0.337872	2.61423e-05	0.0208877	0.125957	0.0419508	1	0.106968
cg01431482	1.95865e-27	1.56496e-24	0.438836	0.0401222	1	0.061672	0.0320504	1	0.112705
cg01511742	9.06359e-20	7.24181e-17	-0.373694	0.0224968	1	-0.068549	0.000153834	0.122913	-0.197642
cg01512113	2.88897e-26	2.30829e-23	0.429781	0.000127277	0.101694	0.11486	0.000166118	0.132728	0.196662
cg01667185	1.2984e-22	1.03742e-19	0.39957	4.09519e-06	0.00327206	0.137883	0.000344868	0.27555	0.187093
cg01671895	1.63131e-21	1.30342e-18	-0.38984	0.28453	1	-0.032179	0.00353493	1	-0.152937
cg01692482	3.51795e-24	2.81084e-21	0.41291	9.19827e-08	7.34942e-05	0.159632	0.00012021	0.0960474	0.200758
cg01710607	1.14718e-17	9.16595e-15	0.35295	0.854829	1	-0.00550267	0.348802	1	0.0493839
cg01765641	5.16713e-24	4.12853e-21	0.411517	0.00016647	0.13301	0.112878	0.0469953	1	0.104475
cg01810111	3.37504e-22	2.69666e-19	0.395935	1.55499e-08	1.24244e-05	0.168869	0.00236843	1	0.159291
cg01831657	1.33846e-15	1.06943e-12	0.330939	0.0102459	1	0.0771028	0.13997	1	0.0777231
cg01845501	2.01852e-21	1.6128e-18	0.389006	0.000167681	0.133977	0.112824	0.0536863	1	0.101494
cg01868791	3.81632e-22	3.04924e-19	0.395465	0.0318039	1	0.064502	0.0209054	1	0.121365
cg01890836	4.25357e-20	3.3986e-17	-0.376804	0.663756	1	-0.0130745	0.00603815	1	-0.144056
cg01908954	5.44033e-26	4.34682e-23	0.427611	8.33212e-08	6.65736e-05	0.160159	1.56934e-06	0.00125391	0.249265
cg01910125	2.01167e-22	1.60732e-19	0.39791	0.140747	1	0.0442807	0.840513	1	-0.0106132
cg01912040	1.48258e-27	1.18458e-24	0.439758	0.000562115	0.44913	0.103462	6.51446e-06	0.00520506	0.234485
cg01933709	1.98263e-21	1.58412e-18	0.389077	0.0372878	1	0.0625749	0.000298556	0.238546	0.189019
cg01939535	7.28886e-19	5.8238e-16	0.364946	0.000314879	0.251589	-0.108039	0.945975	1	-0.00357382
cg02049979	1.57494e-18	1.25838e-15	0.361643	2.09958e-05	0.0167756	0.127422	0.103657	1	0.0856719
cg02076355	7.8346e-19	6.25984e-16	-0.364638	0.0387944	1	-0.062088	0.000156922	0.125381	-0.197389
cg02094337	1.17928e-21	9.42245e-19	0.391106	0.0058957	1	0.0826734	0.0472715	1	0.104345
cg02118776	5.28844e-28	4.22546e-25	0.443145	0.822206	1	0.00675827	0.0291042	1	0.114705
cg02128483	3.99791e-22	3.19433e-19	0.395286	6.72334e-05	0.0537195	0.11945	0.00900874	1	0.137095
cg02137984	3.08078e-23	2.46154e-20	0.404961	0.0286843	1	0.0657291	0.00681048	1	0.141993
cg02189888	1.50191e-30	1.20003e-27	0.461721	1.74892e-06	0.00139739	0.143037	1.54081e-08	1.23111e-05	0.291835
cg02202502	1.77497e-21	1.4182e-18	0.38951	0.370418	1	0.0269339	0.771946	1	-0.0152851
cg02250501	2.4811e-14	1.9824e-11	0.316503	0.0114683	1	0.0759253	0.223309	1	0.0641608
cg02262037	5.91208e-25	4.72375e-22	0.419288	3.70535e-06	0.00296057	0.138498	0.0142601	1	0.128712
cg02301019	1.15547e-17	9.23222e-15	0.352918	1.51634e-05	0.0121155	0.129569	0.201459	1	0.0672956
cg02331561	2.59575e-49	2.074e-46	0.571722	3.95915e-07	0.000316336	0.15163	3.39822e-15	2.71518e-12	0.398065
cg02337695	1.70159e-21	1.35957e-18	0.389675	0.00476582	1	0.0847354	0.600786	1	-0.0275927
cg02376097	3.35141e-21	2.67778e-18	0.387012	0.957002	1	0.00162158	0.00322393	1	0.154419
cg02402882	2.26202e-22	1.80735e-19	0.397463	0.37458	1	0.0267006	0.0051255	1	0.146824
cg02404377	1.63544e-17	1.30672e-14	0.351369	0.00879059	1	0.0786798	0.00183591	1	0.163216
cg02458141	3.37284e-17	2.6949e-14	-0.348113	0.00771656	1	-0.0800009	0.0101187	1	-0.135015
cg02566157	3.94774e-23	3.15425e-20	0.404038	4.03899e-07	0.000322715	0.151518	0.000858347	0.685819	0.17445
cg02583228	2.67706e-19	2.13897e-16	0.369183	0.0799679	1	-0.0526228	0.376189	1	0.0466474
cg02626307	1.32182e-24	1.05614e-21	0.416427	6.79065e-05	0.0542573	0.119379	0.0388714	1	0.108617
cg02732508	2.93217e-19	2.34281e-16	0.3688	1.91207e-06	0.00152775	0.142506	9.77877e-06	0.00781323	0.230086
cg02735684	2.00877e-19	1.60501e-16	0.370386	0.000994907	0.79493	0.098767	0.155323	1	0.074839
cg02751838	1.91624e-19	1.53108e-16	0.370583	0.000470786	0.376158	0.104881	0.3796	1	0.0463153
cg02821342	1.48233e-25	1.18438e-22	-0.424142	0.00197819	1	-0.0928389	5.97572e-07	0.00047746	-0.258786
cg02858808	3.28423e-21	2.6241e-18	0.387092	5.99109e-06	0.00478688	0.135517	0.000414384	0.331093	0.184613
cg02895699	3.86372e-16	3.08711e-13	0.336857	0.00628581	1	0.0820438	0.0925688	1	0.0885365
cg02903756	7.69631e-20	6.14935e-17	0.374369	0.312475	1	-0.0303711	0.878922	1	-0.00803423
cg02911270	8.46697e-19	6.76511e-16	0.364306	0.000303814	0.242747	0.108316	0.00119194	0.952363	0.169683
cg02951274	5.21147e-30	4.16397e-27	0.457874	0.000721028	0.576101	0.101438	2.2278e-13	1.78001e-10	0.372791
cg02993699	7.07565e-25	5.65344e-22	0.418651	7.11302e-07	0.000568331	0.148299	0.0549441	1	0.100968
cg03020208	3.11452e-28	2.4885e-25	0.44487	2.11106e-08	1.68673e-05	0.167316	5.86174e-09	4.68353e-06	0.299894
cg03036557	1.43111e-63	1.14345e-60	0.634245	7.66085e-15	6.12102e-12	0.230625	1.30959e-26	1.04636e-23	0.521266
cg03043671	5.85681e-12	4.67959e-09	0.287162	0.000207728	0.165975	0.111219	0.0107327	1	0.133951
cg03078672	1.40355e-20	1.12143e-17	0.381303	0.187291	1	0.0396438	3.3813e-06	0.00270166	0.241412
cg03092482	3.08207e-18	2.46257e-15	0.358734	0.184092	1	0.0399329	0.0570203	1	0.100122
cg03289072	7.66001e-19	6.12035e-16	0.364734	0.0194489	1	0.0701954	0.00184061	1	0.163177
cg03303325	1.08983e-15	8.70774e-13	0.331927	4.64749e-08	3.71335e-05	0.163241	5.41774e-09	4.32877e-06	0.30054
cg03339956	1.78725e-20	1.42801e-17	0.380328	4.50402e-08	3.59872e-05	0.163405	3.75925e-05	0.0300364	0.214845
cg03341233	2.91042e-20	2.32543e-17	0.378352	9.22612e-08	7.37167e-05	0.159615	0.170526	1	0.0721884
cg03366992	5.17843e-22	4.13757e-19	0.394292	0.0720179	1	0.0540674	0.000603544	0.482232	0.179433
cg03370704	4.71314e-17	3.7658e-14	0.346595	0.00417637	1	0.0859939	0.00490836	1	0.147548
cg03406993	5.7502e-21	4.59441e-18	0.384873	0.00315175	1	0.0886258	0.88822	1	-0.00741306
cg03465682	2.23144e-19	1.78292e-16	0.369946	0.000352931	0.281992	0.107152	0.266222	1	-0.0585876
cg03495084	8.62145e-15	6.88854e-12	-0.321819	0.771179	1	-0.00874694	0.0319614	1	-0.112763
cg03503871	1.8995e-22	1.5177e-19	0.398128	3.46104e-06	0.00276537	0.138917	0.000405386	0.323903	0.184911
cg03539717	1.15459e-23	9.22517e-21	0.408582	0.000227231	0.181557	0.11054	0.000149287	0.11928	0.198024
cg03545227	1.69663e-67	1.35561e-64	0.64924	7.86887e-05	0.0628723	0.118334	9.36502e-10	7.48265e-07	0.314541
cg03553786	2.33417e-23	1.865e-20	0.405989	6.8728e-09	5.49137e-06	0.172946	2.77279e-07	0.000221546	0.266097
cg03555227	5.21044e-42	4.16314e-39	0.533554	1.03432e-09	8.26423e-07	0.182049	2.49715e-13	1.99522e-10	0.37207
cg03570232	3.00897e-21	2.40417e-18	0.387437	0.00101916	0.814306	-0.0985647	0.780368	1	0.0147056
cg03576555	3.42076e-28	2.73319e-25	0.444565	0.0246034	1	0.0675209	0.0415248	1	0.10719
cg03588966	2.65982e-19	2.1252e-16	0.36921	0.121909	1	0.0464968	0.305113	1	0.0540482
cg03594801	7.82684e-19	6.25365e-16	0.364642	0.102076	1	0.0491408	0.318767	1	0.0525464
cg03610636	1.05421e-20	8.42314e-18	0.382453	0.1231	1	0.0463491	0.0268013	1	0.116393
cg03657791	2.76498e-20	2.20922e-17	0.37856	0.00965818	1	0.077714	0.765165	1	-0.0157531
cg03661054	4.20693e-27	3.36134e-24	0.436292	0.00032414	0.258988	0.107814	0.871092	1	0.00855823
cg03702686	1.2068e-27	9.64236e-25	0.440437	8.07337e-06	0.00645062	0.133634	0.0023258	1	0.159574
cg03837111	1.34029e-20	1.0709e-17	0.381488	0.0167912	1	0.0718264	0.000232846	0.186044	0.192296
cg03842205	1.9526e-24	1.56013e-21	0.41503	0.699171	1	0.0116222	0.0179561	1	0.124329
cg03900492	7.95198e-16	6.35364e-13	0.333435	0.100205	1	0.0494106	0.694659	1	-0.0207008
cg03972505	1.38656e-18	1.10786e-15	0.362192	0.204925	1	0.0381119	0.946556	1	-0.00353537
cg04023742	4.92684e-27	3.93655e-24	0.435763	5.98346e-06	0.00478078	0.135525	0.0478193	1	0.10409
cg04065767	1.46454e-24	1.17016e-21	0.416061	0.0490938	1	0.0591311	0.0128559	1	0.130644
cg04084157	1.27213e-25	1.01643e-22	0.424674	8.04931e-08	6.4314e-05	0.160343	6.18059e-10	4.93829e-07	0.317751
cg04117455	1.28333e-25	1.02538e-22	0.424644	0.000246545	0.196989	0.109919	3.85063e-06	0.00307665	0.240055
cg04177015	3.30387e-24	2.6398e-21	0.413137	0.282628	1	0.0323063	0.00198435	1	0.162027
cg04212239	3.18766e-31	2.54694e-28	0.466446	0.81235	1	0.00713983	0.194919	1	0.0682815
cg04258676	6.93511e-17	5.54115e-14	0.344833	0.0548718	1	0.0576946	0.00741014	1	0.14053
cg04271792	7.53246e-27	6.01844e-24	0.434338	0.215233	1	0.0372604	3.50037e-08	2.7968e-05	0.28479
cg04322596	2.57874e-23	2.06042e-20	0.40562	4.46879e-05	0.0357056	0.122303	3.64193e-06	0.0029099	0.240638
cg04326566	4.86917e-19	3.89047e-16	0.36666	1.05793e-06	0.000845282	0.146	3.82899e-05	0.0305936	0.214629
cg04368796	1.9242e-46	1.53744e-43	0.557304	1.01539e-05	0.00811298	0.132169	4.14488e-16	3.31176e-13	0.410003
cg04436083	3.9848e-20	3.18386e-17	0.377071	0.000149978	0.119832	0.113652	0.0558426	1	0.100599
cg04437845	8.11363e-21	6.48279e-18	0.383501	0.0314537	1	0.0646345	0.00194105	1	0.162365
cg04582295	3.05113e-19	2.43786e-16	0.368633	0.0740241	1	0.053691	0.000291723	0.233087	0.189327
cg04622775	8.73263e-24	6.97737e-21	0.409605	0.0182084	1	0.0709307	1.02016e-11	8.15108e-09	0.347583
cg04642105	8.56978e-23	6.84725e-20	0.401137	0.908606	1	0.00345262	0.462434	1	0.0387421
cg04645070	5.96257e-17	4.76409e-14	-0.345524	1.95957e-08	1.56569e-05	-0.167696	2.62695e-08	2.09893e-05	-0.287277
cg04682699	1.38872e-22	1.10959e-19	0.399316	0.00054217	0.433194	0.103752	0.000114975	0.0918652	0.201316
cg04684152	1.74714e-23	1.39597e-20	0.407059	4.00699e-07	0.000320159	0.151563	1.9234e-05	0.015368	0.222562
cg04684267	9.69147e-40	7.74348e-37	0.520621	1.92235e-07	0.000153595	0.155642	1.20098e-09	9.59583e-07	0.312601
cg04738827	2.63596e-23	2.10613e-20	0.405539	1.26053e-06	0.00100716	0.144974	2.94954e-07	0.000235668	0.265517
cg04743859	2.38878e-26	1.90863e-23	0.43043	6.12926e-05	0.0489728	0.120102	0.000865042	0.691169	0.174339
cg04767507	2.32543e-18	1.85802e-15	0.359958	1.32899e-05	0.0106186	0.13043	0.0320868	1	0.112682
cg04845871	1.81016e-14	1.44632e-11	-0.3181	2.19333e-06	0.00175247	-0.141683	0.283629	1	-0.0565042
cg04880546	1.98836e-69	1.5887e-66	0.656317	1.30124e-09	1.03969e-06	0.18097	4.2967e-32	3.43306e-29	0.566349
cg04881751	3.71476e-23	2.96809e-20	0.404265	5.69143e-08	4.54745e-05	0.162178	0.0112296	1	0.133128
cg04885315	7.32458e-20	5.85234e-17	0.374574	0.00104147	0.832132	0.0983824	0.00368193	1	0.152277
cg04908961	1.12697e-18	9.00452e-16	0.363082	0.030148	1	0.0651398	0.195917	1	0.0681295
cg04945634	3.55269e-20	2.8386e-17	0.37754	0.848767	1	-0.00573521	0.073028	1	0.094336
cg04965094	4.93996e-19	3.94703e-16	0.366599	9.5912e-05	0.0766337	0.116915	0.0215326	1	0.120782
cg05031424	1.08784e-20	8.6918e-18	0.382327	0.000182568	0.145872	0.112189	0.000683871	0.546413	0.17768
cg05031801	5.42694e-21	4.33613e-18	0.385103	0.000288138	0.230222	0.108724	0.0003384	0.270382	0.187347
cg05092960	1.34742e-15	1.07659e-12	0.330907	0.00025853	0.206565	0.109557	7.89817e-05	0.0631064	0.205958
cg05105477	4.80924e-18	3.84258e-15	0.356789	7.66029e-05	0.0612057	0.118525	0.0507189	1	0.102775
cg05169099	2.52304e-19	2.01591e-16	0.369431	0.0278515	1	0.0660761	0.0380391	1	0.109082
cg05202073	1.85677e-19	1.48356e-16	0.370715	0.000378149	0.302141	0.106612	0.989784	1	-0.000675338
cg05228359	2.73395e-15	2.18443e-12	-0.327479	2.62135e-07	0.000209446	-0.153932	2.3126e-10	1.84777e-07	-0.325196
cg05238606	3.07749e-17	2.45892e-14	0.348527	0.551639	1	0.017903	0.00726507	1	0.140874
cg05240712	3.43151e-18	2.74177e-15	0.358265	0.000326252	0.260676	0.107764	2.18336e-05	0.0174451	0.221123
cg05240982	4.78486e-19	3.8231e-16	0.366734	0.000425687	0.340124	0.10568	0.213722	1	0.0655078
cg05262711	8.49131e-22	6.78456e-19	0.392382	0.0141665	1	0.0736767	0.000555697	0.444002	0.180583
cg05522415	4.86005e-21	3.88318e-18	0.385541	0.000860253	0.687342	0.0999814	0.000412367	0.329481	0.184679
cg05525368	8.86015e-23	7.07926e-20	0.401012	0.0022524	1	0.0916815	0.078113	1	0.0927162
cg05532093	2.13624e-21	1.70686e-18	0.388784	0.213093	1	0.0374347	0.663823	1	0.0229205
cg05537316	1.38855e-20	1.10945e-17	0.381346	0.839559	1	0.00608906	0.0118686	1	0.132116
cg05539847	4.29259e-22	3.42978e-19	0.395013	4.51858e-05	0.0361034	0.122227	2.28714e-05	0.0182742	0.220593
cg05558539	1.13999e-20	9.1085e-18	0.382139	0.000183384	0.146524	0.112155	0.0104458	1	0.134442
cg05637113	2.23561e-19	1.78625e-16	0.369938	0.0127644	1	0.0747927	0.7838	1	0.0144699
cg05638500	9.97732e-21	7.97188e-18	0.382673	1.873e-05	0.0149653	0.12818	0.00229057	1	0.159811
cg05640731	5.59035e-20	4.46669e-17	0.375685	0.807717	1	-0.0073196	0.143319	1	0.0770742
cg05641843	2.16673e-26	1.73122e-23	0.430762	7.41239e-05	0.059225	0.118759	1.32123e-07	0.000105566	0.272955
cg05703211	1.08007e-14	8.62978e-12	0.320695	0.000409542	0.327224	0.105985	0.0486315	1	0.103715
cg05708550	1.75396e-33	1.40141e-30	0.481789	1.03191e-06	0.000824496	0.146145	3.80754e-12	3.04222e-09	0.354295
cg05713044	6.20793e-22	4.96014e-19	0.393593	0.0199225	1	-0.0699254	0.376898	1	0.0465782
cg05726118	4.82801e-20	3.85758e-17	0.376286	0.000204988	0.163785	0.111319	0.0110262	1	0.133461
cg05767015	1.47487e-18	1.17842e-15	0.361926	0.618688	1	0.0149683	0.000719472	0.574858	0.176964
cg05813616	1.86684e-21	1.4916e-18	0.389312	0.493235	1	0.0206051	0.828908	1	0.0113972
cg05901613	2.13603e-18	1.70669e-15	0.360326	0.396439	1	-0.0255003	0.257694	1	-0.0596425
cg05917988	3.08167e-39	2.46225e-36	0.517681	5.32611e-10	4.25556e-07	0.185131	1.10048e-35	8.79284e-33	0.59253
cg05949889	1.85166e-19	1.47948e-16	0.370726	0.109581	1	0.0480962	0.0280154	1	0.115488
cg05961176	5.40423e-20	4.31798e-17	0.375824	0.673365	1	-0.0126776	0.0124774	1	-0.131196
cg06015142	3.35392e-19	2.67978e-16	0.368235	0.415995	1	0.0244599	0.146735	1	0.0764241
cg06030846	7.05545e-19	5.63731e-16	0.365084	0.742727	1	-0.00987205	0.326309	1	0.0517348
cg06062998	2.08502e-18	1.66593e-15	0.360431	7.32559e-05	0.0585315	0.118842	0.145346	1	0.076687
cg06078335	4.68093e-24	3.74006e-21	0.411875	0.006539	1	0.0816538	0.00590469	1	0.144436
cg06084073	5.95852e-21	4.76085e-18	0.384731	0.000109469	0.087466	0.115959	0.00232557	1	0.159575
cg06121469	1.16585e-27	9.31516e-25	0.440551	0.0132176	1	0.0744206	7.83753e-14	6.26219e-11	0.379311
cg06128142	4.6529e-17	3.71767e-14	0.346654	0.487291	1	0.0208893	0.0189239	1	0.123312
cg06166915	1.25749e-20	1.00474e-17	0.381745	0.35711	1	0.0276913	0.705655	1	0.0199183
cg06182121	5.22614e-20	4.17568e-17	0.375961	0.0477374	1	-0.0594888	0.518059	1	-0.0340789
cg06191348	2.98513e-22	2.38512e-19	0.396405	1.35401e-06	0.00108185	0.144553	0.61994	1	0.0261518
cg06202426	4.14948e-22	3.31544e-19	0.395143	4.08254e-09	3.26195e-06	0.175497	0.273586	1	0.0576952
cg06212670	7.06136e-14	5.64203e-11	0.311136	0.0830759	1	0.0520897	0.00377499	1	0.151871
cg06313507	3.71451e-26	2.9679e-23	0.428921	0.442661	1	-0.0230865	0.180065	1	0.0706143
cg06319762	2.82631e-20	2.25822e-17	0.378471	0.115338	1	0.0473326	0.196326	1	0.0680673
cg06335143	2.88931e-31	2.30856e-28	0.466744	2.48194e-10	1.98307e-07	0.188614	4.75e-15	3.79525e-12	0.396119
cg06340161	2.90029e-14	2.31734e-11	0.315709	0.181712	1	0.0401504	0.000360728	0.288221	0.186489
cg06359056	1.86314e-19	1.48865e-16	0.3707	0.335649	1	-0.0289511	0.293543	1	0.0553559
cg06413794	1.63251e-16	1.30437e-13	0.340886	0.0432032	1	0.0607498	0.466122	1	0.0384238
cg06430772	1.81527e-21	1.4504e-18	0.389422	0.51573	1	0.0195458	0.142808	1	0.0771724
cg06442489	1.19936e-17	9.58289e-15	0.352752	0.00426443	1	0.085796	0.0114073	1	0.132842
cg06453088	3.69195e-17	2.94986e-14	0.347704	0.657272	1	-0.0133436	0.975618	1	0.0016119
cg06454901	7.76755e-22	6.20628e-19	0.392727	0.0119121	1	0.0755253	0.58726	1	0.0286227
cg06458239	7.9635e-85	6.36284e-82	0.706652	5.28032e-16	4.21898e-13	0.240185	2.31991e-22	1.85361e-19	0.48102
cg06475223	5.38214e-25	4.30033e-22	0.41962	0.773048	1	-0.00867347	1.46292e-06	0.00116888	0.24997
cg06508005	1.4967e-20	1.19587e-17	0.381044	2.74965e-07	0.000219697	0.153667	5.56114e-08	4.44335e-05	0.280728
cg06530983	8.0163e-15	6.40503e-12	-0.322181	0.142232	1	-0.044116	0.000563308	0.450083	-0.180394
cg06539449	4.81386e-20	3.84627e-17	0.376298	0.0337632	1	0.0637831	0.356078	1	0.0486441
cg06545359	1.28165e-16	1.02403e-13	0.342007	0.00444854	1	0.0853941	0.539372	1	0.0323622
cg06555661	2.2089e-27	1.76491e-24	0.438437	0.000851469	0.680324	0.100067	0.135628	1	0.0785824
cg06568490	2.33989e-18	1.86958e-15	0.359931	0.000523734	0.418464	0.10403	0.000951262	0.760059	0.172971
cg06617217	1.81707e-20	1.45184e-17	0.380261	0.566097	1	0.0172566	0.0281943	1	0.115358
cg06621425	1.90901e-19	1.5253e-16	0.370599	0.0182985	1	0.0708758	0.597904	1	-0.0278112
cg06637032	6.2353e-21	4.982e-18	0.384551	7.11105e-07	0.000568173	0.148301	0.0271515	1	0.116128
cg06639320	1.66095e-46	1.3271e-43	0.557633	7.63827e-10	6.10298e-07	0.183463	4.30535e-19	3.43997e-16	0.445971
cg06648759	9.39845e-26	7.50937e-23	0.425724	0.000708098	0.56577	0.101587	3.95509e-06	0.00316012	0.239775
cg06660057	1.44985e-18	1.15843e-15	0.362	0.00374263	1	0.0870273	0.00351524	1	0.153027
cg06669056	3.45009e-23	2.75662e-20	0.40454	0.818025	1	-0.00691998	0.0986499	1	0.0869337
cg06737494	8.90262e-44	7.11319e-41	0.543252	2.83711e-09	2.26685e-06	0.177258	2.241e-06	0.00179056	0.245653
cg06739752	4.8638e-19	3.88618e-16	0.366664	0.119052	1	0.0468557	0.00225683	1	0.160041
cg06748146	3.15256e-25	2.5189e-22	0.421504	0.196564	1	0.0388256	0.222323	1	0.0642974
cg06852243	3.2982e-22	2.63526e-19	0.396024	0.0182218	1	0.0709225	0.0204002	1	0.121846
cg06915470	3.81056e-19	3.04464e-16	0.367696	0.0319493	1	0.0644473	0.115543	1	0.0828593
cg06922393	4.58134e-20	3.66049e-17	0.376501	0.00210691	1	0.0922784	0.00753466	1	0.14024
cg06955716	8.32794e-30	6.65402e-27	0.456412	0.00086082	0.687795	0.099976	0.24889	1	0.060757
cg06973176	1.18183e-20	9.44283e-18	0.381994	0.000222442	0.177731	0.110701	0.0031694	1	0.154692
cg07028415	4.06662e-18	3.24923e-15	0.357523	2.7423e-05	0.021911	0.125635	8.97765e-05	0.0717314	0.204386
cg07066898	7.3936e-39	5.90748e-36	0.515438	5.54471e-10	4.43022e-07	0.184946	2.84556e-13	2.2736e-10	0.371242
cg07077735	3.20506e-19	2.56085e-16	0.368426	0.000252925	0.202087	0.109724	0.0375024	1	0.109386
cg07078958	4.17226e-16	3.33364e-13	-0.336494	0.927291	1	0.00274456	0.00223079	1	-0.160221
cg07099121	5.52267e-21	4.41262e-18	0.385034	0.000309429	0.247234	0.108174	1.66964e-05	0.0133404	0.224157
cg07131274	7.04919e-25	5.6323e-22	0.418664	9.03187e-05	0.0721647	0.117347	0.000818969	0.654356	0.175122
cg07168930	7.89078e-25	6.30473e-22	0.418264	6.46634e-05	0.0516661	0.119725	0.00794346	1	0.139316
cg07177395	6.50406e-17	5.19674e-14	0.345126	0.0177851	1	0.0711916	0.0141633	1	0.12884
cg07196505	4.86621e-23	3.8881e-20	0.403258	0.0621532	1	-0.0560537	0.39316	1	-0.0450129
cg07220152	1.16558e-18	9.31295e-16	-0.362938	0.242365	1	-0.0351509	4.22004e-05	0.0337181	-0.213485
cg07220650	1.13838e-18	9.09566e-16	0.363039	0.225529	1	0.0364388	0.5235	1	0.0336373
cg07224469	6.99501e-32	5.58901e-29	0.471	0.00104981	0.838801	0.0983151	0.0183713	1	0.123887
cg07268240	4.28956e-23	3.42736e-20	0.403729	0.561073	1	0.0174803	0.0142489	1	0.128727
cg07303143	5.51976e-58	4.41029e-55	0.611375	3.94131e-16	3.1491e-13	0.241206	2.2274e-25	1.7797e-22	0.510147
cg07339155	1.77153e-21	1.41546e-18	0.389518	0.00470868	1	0.084851	0.316032	1	-0.0528438
cg07392449	5.65542e-41	4.51868e-38	0.527722	0.0468522	1	0.0597268	6.4102e-14	5.12175e-11	0.380549
cg07437263	5.25837e-20	4.20144e-17	0.375936	7.6243e-06	0.00609182	0.133997	0.000136301	0.108905	0.199177
cg07461273	3.15098e-22	2.51763e-19	0.396198	2.92465e-06	0.00233679	0.139944	0.000358864	0.286732	0.186559
cg07477924	3.59194e-21	2.86996e-18	0.386738	0.00790203	1	0.0797615	1.22228e-05	0.009766	0.227633
cg07547549	3.71307e-37	2.96674e-34	0.50519	4.22114e-11	3.37269e-08	0.196448	3.8618e-06	0.00308558	0.240025
cg07558209	1.0148e-20	8.10822e-18	0.382605	0.000678097	0.5418	0.101941	0.0295519	1	0.11439
cg07563882	7.04627e-22	5.62997e-19	0.393104	0.676032	1	0.0125678	0.310294	1	0.0534733
cg07568015	7.18977e-18	5.74462e-15	0.355019	0.00486544	1	0.0845368	0.0188525	1	0.123386
cg07570470	9.93354e-20	7.9369e-17	0.373315	2.65347e-05	0.0212012	0.125857	0.0177917	1	0.124506
cg07589899	1.09602e-34	8.75717e-32	0.489659	7.74351e-09	6.18707e-06	0.172356	1.07453e-08	8.58552e-06	0.29487
cg07614623	2.43559e-18	1.94603e-15	0.359757	0.696838	1	0.011717	0.0597468	1	0.0990494
cg07665115	2.11411e-18	1.68917e-15	0.360371	0.668538	1	-0.0128767	0.00152607	1	-0.166011
cg07668993	3.45053e-23	2.75697e-20	-0.404539	3.32748e-12	2.65865e-09	-0.207148	1.34474e-06	0.00107445	-0.250814
cg07719077	2.93641e-17	2.34619e-14	0.348739	0.540764	1	0.0183947	0.133246	1	0.0790629
cg07735777	9.34025e-21	7.46286e-18	0.382938	0.00016288	0.130141	0.11304	1.63559e-08	1.30684e-05	0.291329
cg07744216	3.59194e-17	2.86996e-14	0.347828	0.912158	1	-0.00331787	0.397096	1	0.04464
cg07760161	6.38768e-23	5.10376e-20	0.402241	0.306423	1	0.0307532	0.0777895	1	0.0928166
cg07788865	7.70628e-16	6.15732e-13	-0.333584	2.73026e-05	0.0218148	-0.125665	1.10947e-06	0.000886464	-0.252728
cg07890839	9.39224e-19	7.5044e-16	-0.363863	0.599332	1	-0.0157998	0.000391897	0.313126	-0.18537
cg07936585	4.08751e-20	3.26592e-17	0.376967	0.0040845	1	0.0862044	0.589756	1	0.0284318
cg07966572	5.2952e-22	4.23087e-19	0.394206	0.0548468	1	0.0577005	0.00559997	1	0.145334
cg07993350	1.97981e-17	1.58187e-14	0.350513	0.230772	1	-0.0360306	0.718566	1	-0.019005
cg08024169	3.68893e-14	2.94745e-11	0.314481	0.00465512	1	0.0849606	3.08159e-05	0.0246219	0.217163
cg08097417	9.2792e-40	7.41408e-37	0.520731	7.33143e-23	5.85781e-20	0.289675	8.11352e-13	6.4827e-10	0.364517
cg08111414	1.44809e-26	1.15702e-23	0.432131	0.00248804	1	0.0907858	0.0210692	1	0.121212
cg08140609	1.93057e-27	1.54253e-24	0.438884	0.00724965	1	0.0806273	0.988484	1	-0.000761229
cg08173649	1.92658e-18	1.53934e-15	0.360773	0.00049936	0.398989	0.104411	0.00178364	1	0.163655
cg08216943	1.36596e-16	1.0914e-13	0.341713	0.00254474	1	0.0905819	0.00671027	1	0.142248
cg08223225	2.91026e-18	2.3253e-15	0.358983	3.39831e-05	0.0271525	0.124182	0.011478	1	0.132729
cg08231664	1.16431e-18	9.30287e-16	0.362943	0.00318634	1	0.088525	0.00226987	1	0.159952
cg08285489	1.85445e-19	1.4817e-16	0.37072	0.000459192	0.366894	0.105079	0.00526727	1	0.146366
cg08318076	2.51233e-28	2.00735e-25	0.445567	7.62388e-07	0.000609148	0.1479	5.46721e-20	4.3683e-17	0.455991
cg08343600	3.42371e-22	2.73554e-19	0.395881	0.00271694	1	0.0899871	0.0600879	1	0.098918
cg08367318	1.13277e-24	9.05086e-22	0.416978	0.0568804	1	0.0572247	1.88436e-05	0.0150561	0.222794
cg08374494	2.58497e-20	2.06539e-17	0.378834	0.00929621	1	0.0781072	0.17483	1	0.0714702
cg08459783	1.36071e-20	1.08721e-17	0.381427	0.000149898	0.119769	0.113656	0.00117495	0.938784	0.169894
cg08491437	1.4875e-20	1.18851e-17	0.381069	1.08247e-07	8.64891e-05	0.158759	0.00938519	1	0.136365
cg08520742	4.84439e-22	3.87066e-19	0.394548	0.00102853	0.821793	0.0984876	0.000303442	0.24245	0.188803
cg08526705	9.46762e-19	7.56462e-16	0.363829	8.6202e-11	6.88754e-08	0.19333	1.73914e-05	0.0138957	0.223698
cg08568298	7.53274e-20	6.01866e-17	0.374458	0.00114287	0.913155	0.0975967	0.233779	1	0.062736
cg08622677	1.1069e-36	8.84412e-34	0.502268	1.6874e-07	0.000134823	0.156354	8.5361e-09	6.82035e-06	0.29679
cg08694014	1.24305e-23	9.93196e-21	0.408312	0.919919	1	0.00302372	0.0286606	1	0.115021
cg08739115	2.34459e-22	1.87333e-19	0.397327	0.373531	1	0.0267592	0.155701	1	-0.0747708
cg08767838	1.08788e-19	8.69217e-17	0.372939	0.000790792	0.631843	0.100679	0.00046167	0.368874	0.183139
cg08827700	3.61885e-19	2.89146e-16	0.367914	0.172995	1	0.0409657	0.0195541	1	0.122675
cg08904363	3.96519e-39	3.16819e-36	0.517037	8.47918e-06	0.00677487	0.133322	1.01581e-15	8.11631e-13	0.404975
cg08946658	7.05096e-19	5.63372e-16	0.365087	0.399559	1	-0.0253322	0.0333201	1	0.111891
cg08951273	2.98279e-21	2.38325e-18	0.387471	0.00122576	0.979382	0.097001	0.000624283	0.498802	0.178961
cg08983186	6.37455e-15	5.09327e-12	0.323319	0.000127091	0.101545	0.114871	0.00463215	1	0.148511
cg09080114	2.84031e-13	2.26941e-10	-0.30382	0.0125845	1	-0.0749436	6.73555e-05	0.053817	-0.207896
cg09329097	5.58005e-19	4.45846e-16	0.366082	0.00153793	1	0.095048	0.332233	1	0.0511058
cg09357795	2.51205e-19	2.00713e-16	0.36945	0.00824718	1	0.079329	0.021871	1	0.120474
cg09429847	4.21314e-19	3.3663e-16	0.367272	0.91203	1	0.00332275	0.0155943	1	0.127026
cg09445967	8.22212e-22	6.56948e-19	0.392506	0.000526741	0.420866	0.103984	0.0337026	1	0.111652
cg09489470	9.94595e-19	7.94681e-16	0.363618	0.854233	1	0.00552553	0.628297	1	-0.0255292
cg09548403	1.47588e-28	1.17923e-25	-0.447286	0.00204597	1	-0.0925397	1.50023e-05	0.0119869	-0.225355
cg09576649	3.2905e-21	2.62911e-18	0.387084	0.00912117	1	0.0783022	0.0166286	1	0.125803
cg09609051	2.44488e-22	1.95346e-19	0.397167	0.00283102	1	0.0896117	0.0535263	1	0.101561
cg09623845	5.73484e-18	4.58213e-15	0.356016	0.0027999	1	0.0897128	0.00336192	1	0.153746
cg09650907	3.83104e-24	3.061e-21	-0.412601	0.0120795	1	-0.0753778	0.0195121	1	-0.122716
cg09665406	3.65756e-20	2.92239e-17	0.377421	0.549393	1	0.0180041	0.0439223	1	0.105965
cg09673570	5.11835e-22	4.08956e-19	0.394337	1.07551e-05	0.00859329	0.131799	1.37298e-05	0.0109701	0.226343
cg09730123	5.93927e-19	4.74548e-16	0.365817	0.00141181	1	0.0957886	0.000875743	0.699718	0.174162
cg09746086	2.38993e-22	1.90955e-19	0.397254	0.104115	1	0.0488511	0.329163	1	0.0514309
cg09774649	2.16888e-21	1.73293e-18	0.388725	0.0136631	1	0.0740656	0.918722	1	-0.00538184
cg09813986	1.71205e-24	1.36793e-21	0.415502	2.28844e-06	0.00182846	0.141428	4.86191e-07	0.000388466	0.260772
cg09862914	2.07488e-20	1.65783e-17	0.379725	2.624e-05	0.0209658	0.125932	0.564506	1	0.0303805
cg09864457	2.08447e-25	1.66549e-22	0.422953	1.97085e-11	1.57471e-08	0.199719	5.70104e-05	0.0455513	0.209906
cg09868882	2.10775e-20	1.68409e-17	0.379661	0.259933	1	-0.0338724	0.631303	1	-0.0253062
cg10006887	7.9864e-20	6.38113e-17	0.374217	0.35579	1	0.0277674	0.491316	1	-0.0362855
cg10009224	6.41263e-16	5.12369e-13	0.334459	0.0337072	1	0.0638031	2.04951e-06	0.00163755	0.246564
cg10016004	8.50999e-22	6.79948e-19	0.392373	7.401e-05	0.059134	0.11877	0.22143	1	0.0644215
cg10021411	7.6364e-18	6.10149e-15	0.354753	0.000348734	0.278638	0.107245	0.0397752	1	0.108122
cg10048490	7.28509e-22	5.82079e-19	0.392975	0.00186866	1	0.0933427	0.191132	1	0.0688635
cg10161194	9.05152e-23	7.23217e-20	0.400931	1.0056e-07	8.03475e-05	0.159154	4.72953e-10	3.77889e-07	0.319798
cg10192641	1.72157e-20	1.37553e-17	0.380479	0.0370283	1	0.0626605	0.0450574	1	0.105405
cg10200001	1.21331e-22	9.69432e-20	0.399826	4.24919e-05	0.033951	0.122651	0.000221518	0.176993	0.192946
cg10207362	8.91289e-17	7.1214e-14	0.343682	4.30677e-05	0.0344111	0.122558	6.19831e-07	0.000495245	0.258432
cg10234511	4.90826e-25	3.9217e-22	0.419945	0.0757208	1	0.0533792	0.284821	1	0.0563646
cg10296867	6.88818e-23	5.50366e-20	0.401958	0.0239035	1	0.0678537	0.00257145	1	0.158005
cg10317815	2.33318e-18	1.86421e-15	0.359944	0.615714	1	0.0150953	0.20381	1	0.0669469
cg10477073	3.60208e-14	2.87807e-11	0.314603	2.78984e-06	0.00222908	0.140231	1.26157e-08	1.00799e-05	0.293523
cg10505658	2.59273e-17	2.07159e-14	0.3493	0.0106594	1	0.0766912	0.665121	1	0.0228263
cg10532980	3.604e-22	2.87959e-19	0.395684	0.00352758	1	0.0875806	2.5234e-05	0.020162	0.219468
cg10534359	6.13239e-20	4.89978e-17	0.375305	0.000397027	0.317225	0.106229	0.109442	1	0.0842731
cg10545250	1.56107e-22	1.2473e-19	0.398873	0.00124415	0.994075	0.0968739	1.79758e-06	0.00143627	0.247895
cg10548038	1.63365e-65	1.30529e-62	0.641769	7.53396e-12	6.01963e-09	0.203771	2.88321e-09	2.30368e-06	0.305657
cg10564791	9.30759e-20	7.43677e-17	0.373585	4.11089e-05	0.032846	0.122879	0.00565887	1	0.145157
cg10569694	1.60075e-29	1.279e-26	0.454362	0.921404	1	-0.00296745	8.38149e-10	6.69681e-07	0.315402
cg10729426	6.72231e-83	5.37112e-80	0.70089	1.59168e-13	1.27175e-10	0.219234	4.61895e-10	3.69054e-07	0.319978
cg10745988	9.94234e-21	7.94393e-18	0.382687	4.75905e-05	0.0380248	0.121868	0.0116422	1	0.132469
cg10774647	1.03143e-21	8.24112e-19	0.391627	0.00808704	1	0.0795276	0.0439968	1	0.105928
cg10784519	5.34507e-17	4.27071e-14	-0.346022	0.0875927	1	-0.0513431	0.192293	1	-0.0686842
cg10789314	1.14216e-12	9.12585e-10	-0.296294	0.000699388	0.558811	-0.101688	0.00101736	0.812868	-0.171998
cg10804687	6.05224e-20	4.83574e-17	0.375359	0.000250727	0.200331	0.109791	0.627802	1	0.025566
cg10824677	4.63362e-20	3.70226e-17	0.376454	0.0403413	1	0.0616044	0.135548	1	0.0785986
cg10917910	1.49797e-16	1.19688e-13	0.341285	0.00379026	1	0.0869086	0.16081	1	0.0738608
cg10929582	1.43053e-18	1.14299e-15	0.362057	0.106427	1	0.0485281	0.000210395	0.168105	0.193617
cg10981580	1.39644e-16	1.11575e-13	-0.34161	0.902484	1	-0.00368503	0.0913812	1	-0.0888593
cg11064738	4.02906e-19	3.21922e-16	0.367461	0.00213246	1	0.0921709	0.00402042	1	0.150844
cg11071401	7.37254e-24	5.89066e-21	0.410223	3.87853e-11	3.09895e-08	0.196815	4.04498e-18	3.23194e-15	0.434707
cg11082362	1.42053e-23	1.135e-20	0.407821	0.000101021	0.0807154	0.116541	1.04015e-07	8.3108e-05	0.275128
cg11149849	9.95123e-22	7.95103e-19	0.391766	0.487298	1	-0.0208889	0.932369	1	-0.00447586
cg11177223	2.21982e-14	1.77364e-11	0.317068	0.0669371	1	0.0550604	0.0204478	1	0.1218
cg11230435	4.76001e-17	3.80325e-14	-0.34655	0.455335	1	-0.0224505	1.48491e-06	0.00118644	-0.249821
cg11267480	1.64941e-18	1.31788e-15	0.361444	2.41715e-05	0.0193131	0.126483	0.00109869	0.877855	0.170877
cg11337915	2.56602e-20	2.05025e-17	0.378864	0.00119556	0.955253	0.0972136	0.0642112	1	0.0973767
cg11342615	8.87658e-18	7.09239e-15	-0.354088	0.414683	1	-0.0245287	0.0181286	1	-0.124144
cg11344073	1.53726e-18	1.22827e-15	0.361747	0.409765	1	0.0247881	0.165018	1	0.0731274
cg11383802	1.26717e-18	1.01247e-15	0.362579	2.6482e-06	0.00211591	0.140547	5.57493e-09	4.45437e-06	0.300306
cg11385003	4.10793e-17	3.28224e-14	-0.34722	0.0117904	1	-0.0756337	0.00570968	1	-0.145006
cg11403598	2.24405e-19	1.79299e-16	0.369922	0.0012735	1	0.0966745	0.000600401	0.47972	0.179506
cg11435167	4.31969e-20	3.45143e-17	0.376741	0.479711	1	0.0212544	0.00869025	1	0.137733
cg11463380	4.6074e-20	3.68131e-17	0.376477	0.493335	1	0.0206003	4.04693e-05	0.032335	0.213979
cg11464885	9.72533e-22	7.77054e-19	0.391855	7.89148e-05	0.063053	0.118313	0.0921014	1	0.0886631
cg11526073	1.20008e-19	9.58861e-17	0.372532	0.00443811	1	0.0854164	0.486851	1	0.03666
cg11553687	1.16977e-23	9.34647e-21	0.408534	0.00168108	1	0.0942722	0.164432	1	0.0732287
cg11599721	7.1574e-23	5.71877e-20	0.401814	0.165346	1	0.0417068	0.0174727	1	0.124854
cg11615607	1.50045e-19	1.19886e-16	0.371603	5.54091e-08	4.42718e-05	0.162319	1.56601e-07	0.000125124	0.271399
cg11654118	7.20569e-21	5.75735e-18	0.383974	0.00070298	0.561681	0.101646	3.59275e-05	0.0287061	0.215375
cg11788425	2.48938e-20	1.98901e-17	0.378987	0.00231664	1	0.0914292	0.00654485	1	0.142677
cg11789371	6.72849e-18	5.37606e-15	0.355312	3.44764e-05	0.0275467	0.124084	0.000976117	0.779917	0.172598
cg11811840	5.21427e-23	4.1662e-20	0.403	0.309515	1	-0.0305573	0.951232	1	-0.00322565
cg11817411	5.15888e-22	4.12194e-19	0.394306	0.0298405	1	0.0652615	1.75128e-06	0.00139927	0.248159
cg11818438	2.07888e-21	1.66102e-18	0.388891	0.000540349	0.431739	0.103779	0.945546	1	-0.00360224
cg11888359	1.93495e-10	1.54602e-07	0.266422	0.234815	1	0.0357204	0.0776866	1	0.0928487
cg11904435	3.28411e-24	2.624e-21	0.413158	5.47065e-05	0.0437105	0.120898	0.0227131	1	0.119724
cg11923914	7.10707e-22	5.67855e-19	0.39307	0.000161333	0.128905	0.113111	6.92818e-06	0.00553561	0.233823
cg11933290	2.44782e-17	1.95581e-14	0.349559	0.000223647	0.178694	0.11066	0.127063	1	0.0803418
cg11956467	1.15709e-22	9.24519e-20	0.400006	0.0828561	1	0.0521269	0.00250713	1	0.158402
cg11965881	8.38232e-13	6.69747e-10	0.297986	0.0239059	1	0.0678526	0.00109545	0.875264	0.17092
cg12002710	2.31242e-23	1.84762e-20	0.406024	0.311196	1	0.0304514	0.00506977	1	0.147007
cg12019475	4.07181e-20	3.25338e-17	0.376983	0.00120742	0.964725	0.0971295	0.501952	1	0.0354005
cg12026891	3.05017e-19	2.43708e-16	0.368634	0.00317795	1	0.0885494	0.00605042	1	0.144021
cg12032049	1.15922e-20	9.26217e-18	0.382072	0.873055	1	-0.0048055	0.0146432	1	0.128214
cg12063018	4.60628e-19	3.68041e-16	0.366895	0.965289	1	-0.00130882	0.568147	1	0.030097
cg12076692	7.93705e-22	6.3417e-19	0.392643	0.0160339	1	0.0723325	0.000356815	0.285095	0.186636
cg12100751	2.15052e-26	1.71826e-23	0.430788	8.50619e-06	0.00679645	0.133301	2.02806e-12	1.62042e-09	0.358504
cg12153480	7.75661e-18	6.19753e-15	0.354684	0.0143084	1	0.0735692	0.235428	1	0.0625159
cg12165943	7.25654e-20	5.79798e-17	0.374612	0.00209194	1	0.092342	0.0576583	1	0.0998676
cg12231584	1.22775e-19	9.80975e-17	0.372437	8.68143e-06	0.00693647	0.133171	0.170458	1	0.0721999
cg12262181	1.04125e-22	8.3196e-20	0.400404	0.000427738	0.341763	0.105642	0.000188706	0.150776	0.195025
cg12309348	6.36618e-19	5.08658e-16	0.365522	0.00484308	1	-0.084581	0.0845364	1	0.0907881
cg12373771	4.69743e-56	3.75324e-53	0.603016	2.2063e-06	0.00176283	0.141648	2.55157e-15	2.03871e-12	0.399719
cg12428326	7.19966e-21	5.75253e-18	0.383978	2.24577e-06	0.00179437	0.141541	0.000367936	0.293981	0.186222
cg12451155	1.20115e-17	9.59716e-15	0.352745	1.74939e-05	0.0139776	0.12863	0.00040562	0.324091	0.184903
cg12514868	2.15463e-22	1.72155e-19	0.397649	0.0171319	1	-0.0716051	0.0277653	1	0.115672
cg12575511	1.0541e-20	8.42223e-18	0.382453	0.0123348	1	0.0751564	3.04972e-08	2.43672e-05	0.285987
cg12589298	3.00975e-49	2.40479e-46	0.571407	0.0030397	1	0.0889594	2.43248e-09	1.94355e-06	0.307019
cg12678507	1.61882e-17	1.29344e-14	0.351414	0.0849593	1	0.0517745	0.0215146	1	0.120799
cg12678562	1.24447e-70	9.94334e-68	0.660633	8.57925e-15	6.85482e-12	0.23021	1.95425e-23	1.56145e-20	0.491714
cg12731325	1.33366e-20	1.0656e-17	0.381508	0.0792279	1	0.0527522	0.479287	1	0.0372988
cg12763813	4.87034e-24	3.8914e-21	0.411732	0.0502397	1	0.0588354	0.000126936	0.101422	0.200074
cg12807206	2.95136e-19	2.35813e-16	0.368773	0.0204712	1	0.0696196	0.42932	1	0.0416662
cg12807237	1.49208e-26	1.19218e-23	0.43203	0.00853511	1	0.0789804	0.000490007	0.391515	0.182321
cg12813724	1.23978e-19	9.90581e-17	0.372397	0.316419	1	-0.0301247	0.0274233	1	0.115925
cg12864581	2.87852e-20	2.29994e-17	0.378397	0.00407345	1	0.08623	4.48135e-06	0.0035806	0.238462
cg12926839	1.96917e-19	1.57337e-16	0.370469	0.00240531	1	0.0910911	0.0287257	1	0.114974
cg12977135	6.87431e-21	5.49258e-18	0.384162	4.29525e-05	0.0343191	0.122577	0.15307	1	0.0752483
cg12981876	4.5023e-21	3.59733e-18	0.385844	9.29404e-09	7.42594e-06	0.17145	0.000522172	0.417215	0.181445
cg12983839	4.18409e-28	3.34308e-25	0.443909	0.00167957	1	0.09428	0.000456034	0.364371	0.183307
cg13007207	1.35939e-21	1.08615e-18	0.390552	0.0035975	1	0.0873974	0.0238351	1	0.118761
cg13043300	3.53512e-19	2.82456e-16	0.368013	1.29541e-05	0.0103504	0.130596	8.37911e-05	0.0669491	0.205234
cg13096351	4.28163e-20	3.42102e-17	0.376777	0.000303096	0.242174	0.108334	0.0147491	1	0.128078
cg13201172	5.3751e-27	4.29471e-24	0.435471	5.52686e-05	0.0441596	0.120827	0.000751295	0.600285	0.17635
cg13224583	3.24758e-22	2.59481e-19	0.396083	0.132167	1	0.0452596	0.508538	1	0.0348575
cg13231680	7.86435e-17	6.28361e-14	0.344257	0.0756428	1	-0.0533934	0.0874112	1	-0.0899632
cg13261106	2.56139e-24	2.04655e-21	0.414055	1.16808e-06	0.000933293	0.145421	0.000991241	0.792002	0.172375
cg13300521	2.07591e-14	1.65865e-11	0.317407	0.0701563	1	0.0544243	0.967773	1	0.00213085
cg13340085	1.34737e-19	1.07655e-16	0.372051	0.00274771	1	0.0898845	0.000856978	0.684726	0.174473
cg13389146	4.27895e-26	3.41888e-23	0.428436	0.0150015	1	0.0730575	0.00298515	1	0.155647
cg13449372	5.54317e-23	4.42899e-20	0.402771	5.35878e-05	0.0428167	0.121042	0.0270265	1	0.116223
cg13460409	4.57613e-25	3.65633e-22	0.420192	0.0277606	1	0.0661145	1.35352e-06	0.00108146	0.250749
cg13472359	8.10375e-20	6.4749e-17	0.374157	4.02768e-07	0.000321811	0.151534	2.40689e-05	0.0192311	0.22001
cg13518625	9.14318e-14	7.3054e-11	-0.309793	0.574258	1	-0.0168952	0.243122	1	-0.0615023
cg13569761	5.12855e-22	4.09771e-19	0.394329	0.000250135	0.199858	0.109809	0.0328226	1	0.112207
cg13599835	7.27935e-21	5.8162e-18	0.383934	0.697938	1	0.0116723	0.13622	1	0.0784642
cg13649056	4.40188e-37	3.5171e-34	0.504736	5.44242e-11	4.34849e-08	0.195344	3.17862e-11	2.53972e-08	0.339638
cg13753460	4.63823e-22	3.70595e-19	0.394716	0.988783	1	-0.000422841	0.276367	1	0.0573624
cg13771219	4.08604e-24	3.26475e-21	0.412368	0.297994	1	0.0312938	0.102344	1	0.0859981
cg13783238	2.09784e-32	1.67617e-29	0.474567	0.538247	1	0.0185092	0.000537329	0.429326	0.181049
cg13801740	2.12932e-24	1.70132e-21	0.414719	0.285877	1	-0.0320892	0.661328	1	0.0231018
cg13803765	5.0717e-23	4.05229e-20	0.403104	2.43495e-07	0.000194552	0.15434	1.01494e-07	8.1094e-05	0.27535
cg13816999	1.83455e-25	1.46581e-22	0.423399	0.0013921	1	0.0959098	1.14831e-09	9.17501e-07	0.312952
cg13818276	5.05956e-24	4.04259e-21	0.411593	0.000254226	0.203126	0.109685	0.825041	1	0.0116589
cg13826105	6.55322e-20	5.23602e-17	0.375032	0.030377	1	0.0650498	0.893482	1	0.00706192
cg13833040	1.13237e-27	9.04765e-25	0.440647	0.000968932	0.774176	0.0989889	0.0536683	1	0.101501
cg13845105	3.27366e-21	2.61566e-18	0.387104	0.000404384	0.323102	0.106085	0.599011	1	0.0277272
cg13854930	7.26379e-21	5.80376e-18	0.383942	0.000186107	0.1487	0.112045	0.12243	1	0.0813319
cg13893358	2.28486e-23	1.8256e-20	0.406068	0.138168	1	-0.04457	0.0516278	1	-0.102376
cg13935689	1.19978e-26	9.58627e-24	0.432768	0.00714323	1	0.0807751	3.62551e-06	0.00289678	0.240685
cg13943358	3.73403e-18	2.98349e-15	0.357896	0.000398156	0.318127	0.106207	0.397872	1	-0.0445667
cg13970540	6.01351e-20	4.8048e-17	0.375385	1.0221e-05	0.00816661	0.132127	3.8545e-09	3.07975e-06	0.303314
cg13983181	1.35715e-17	1.08436e-14	0.352201	0.0905482	1	-0.0508711	0.0534691	1	0.101586
cg14003611	3.67178e-18	2.93375e-15	0.35797	0.434617	1	0.0234956	0.0572951	1	0.100012
cg14006649	8.43015e-17	6.73569e-14	0.343938	0.00228775	1	0.0915419	4.09078e-05	0.0326854	0.213852
cg14023774	2.35158e-23	1.87891e-20	0.405962	2.10928e-05	0.0168531	0.127392	0.0303468	1	0.113841
cg14044216	1.60679e-31	1.28382e-28	0.468512	0.0544475	1	0.0577956	0.00102384	0.818046	0.171906
cg14111380	3.82159e-20	3.05345e-17	0.377242	1.04389e-05	0.00834066	0.131991	0.0109987	1	0.133506
cg14184729	2.06806e-23	1.65238e-20	0.406437	0.151461	1	0.0431207	8.91316e-08	7.12161e-05	0.276521
cg14237301	5.78765e-19	4.62433e-16	0.365927	0.726122	1	-0.010535	0.00445786	1	0.149146
cg14255824	1.11054e-26	8.87325e-24	-0.433029	0.00475406	1	-0.0847591	0.000382115	0.30531	-0.185712
cg14279035	4.57613e-23	3.65632e-20	0.403488	0.000224161	0.179104	0.110643	0.339976	1	0.0502945
cg14284211	1.50954e-25	1.20612e-22	-0.424079	0.00791361	1	-0.0797467	3.97596e-05	0.0317679	-0.214187
cg14288335	2.8563e-16	2.28219e-13	0.338276	0.172976	1	0.0409675	0.0016346	1	0.164977
cg14364926	1.71959e-23	1.37395e-20	0.407118	5.13757e-07	0.000410492	0.150158	0.0467406	1	0.104596
cg14375747	4.13758e-18	3.30592e-15	0.357448	0.000615151	0.491506	0.102733	0.00692919	1	0.141694
cg14386870	1.22218e-21	9.76522e-19	0.390967	2.63806e-06	0.00210781	0.14057	9.62348e-05	0.0768916	0.203528
cg14431361	1.09128e-22	8.71936e-20	0.400227	2.39916e-07	0.000191693	0.154422	0.000101828	0.0813608	0.202828
cg14434062	1.00476e-15	8.02804e-13	-0.332316	0.00832236	1	-0.079237	0.0289448	1	-0.114818
cg14447810	3.47334e-20	2.7752e-17	0.377632	0.00393283	1	0.0865614	0.00105243	0.840889	0.171505
cg14505299	4.38317e-21	3.50216e-18	0.38595	0.164209	1	0.0418191	0.770791	1	-0.0153648
cg14514991	9.15318e-20	7.31339e-17	0.373654	0.0613894	1	0.0562182	0.136741	1	0.0783602
cg14544225	5.00867e-18	4.00193e-15	0.35661	0.469198	1	-0.021766	0.116369	1	0.0826723
cg14555736	2.39423e-19	1.91299e-16	0.369651	0.152441	1	-0.0430177	0.665469	1	-0.022801
cg14578500	4.73326e-22	3.78188e-19	0.394638	0.140046	1	0.044359	0.308697	1	0.0536498
cg14590214	2.25565e-22	1.80226e-19	0.397474	1.63658e-05	0.0130763	0.129069	2.45863e-07	0.000196445	0.267223
cg14614689	1.36724e-16	1.09243e-13	0.341708	0.559624	1	0.017545	0.971501	1	-0.0018842
cg14633456	1.07231e-26	8.56779e-24	0.433148	0.00232939	1	0.0913798	2.04208e-14	1.63162e-11	0.387495
cg14674720	8.97293e-42	7.16937e-39	0.532235	5.68114e-17	4.53923e-14	0.247848	7.30049e-10	5.83309e-07	0.316469
cg14676592	3.39584e-46	2.71328e-43	0.556031	0.00077724	0.621015	0.100821	7.32545e-07	0.000585303	0.256809
cg14737704	1.66271e-22	1.3285e-19	0.398634	0.00108681	0.868365	0.0980227	0.0146657	1	0.128185
cg14756040	2.62004e-19	2.09342e-16	0.369273	0.019644	1	0.0700835	0.655456	1	0.0235297
cg14819229	2.82299e-18	2.25557e-15	0.359116	0.728243	1	-0.01045	0.725839	1	0.018493
cg14848772	1.62262e-30	1.29648e-27	0.461483	0.00344853	1	0.0877918	0.0409936	1	0.107469
cg14871225	2.28438e-18	1.82522e-15	-0.360035	5.83355e-05	0.0466101	-0.120449	0.0231072	1	-0.119381
cg14911690	3.83626e-51	3.06517e-48	0.580559	1.83487e-06	0.00146606	0.142752	2.73282e-15	2.18352e-12	0.399324
cg14981819	4.41197e-17	3.52517e-14	0.346895	0.000572445	0.457383	-0.103315	0.970622	1	0.0019424
cg15028232	9.44679e-24	7.54799e-21	0.409317	0.000369994	0.295625	0.106783	0.631725	1	0.0252748
cg15048099	1.84615e-19	1.47508e-16	0.370739	0.0139325	1	0.0738559	0.0507962	1	0.102741
cg15086820	7.45344e-24	5.9553e-21	0.410183	0.252728	1	0.0343893	0.105839	1	0.0851372
cg15101483	1.45737e-20	1.16444e-17	0.381151	0.0295074	1	0.0653946	0.469502	1	-0.0381333
cg15103195	9.06776e-34	7.24514e-31	0.48368	2.37663e-07	0.000189893	0.154474	1.83972e-20	1.46993e-17	0.461148
cg15115984	3.26334e-22	2.60741e-19	0.396064	0.097424	1	0.0498193	0.0203472	1	0.121897
cg15288779	5.4431e-22	4.34904e-19	0.3941	0.924144	1	0.0028637	0.98081	1	0.00126863
cg15345907	1.5936e-21	1.27329e-18	0.389932	0.0046585	1	0.0849536	0.51248	1	-0.0345342
cg15422307	3.41381e-18	2.72763e-15	0.358288	0.000246257	0.196759	0.109928	5.16251e-07	0.000412485	0.260196
cg15471073	4.57915e-22	3.65874e-19	0.394765	0.0301468	1	0.0651403	0.836562	1	-0.0108798
cg15557144	4.17084e-15	3.3325e-12	0.325411	0.100768	1	0.049329	0.0168566	1	0.125543
cg15561453	2.46482e-23	1.9694e-20	0.405788	2.67712e-09	2.13902e-06	0.177537	0.000360373	0.287938	0.186502
cg15563355	6.18232e-20	4.93967e-17	0.375271	0.00164553	1	0.094459	0.00418354	1	0.150192
cg15571405	3.58729e-20	2.86624e-17	-0.3775	0.00409745	1	-0.0861744	4.6499e-08	3.71527e-05	-0.282306
cg15619794	2.11768e-20	1.69203e-17	0.379642	0.316981	1	0.0300897	0.0121176	1	0.131735
cg15623062	3.72813e-23	2.97877e-20	0.404252	0.00350087	1	0.0876515	0.00337637	1	0.153677
cg15733049	2.40199e-21	1.91919e-18	0.388324	0.00115494	0.922796	0.0975075	0.000152758	0.122054	0.197732
cg15777261	7.83155e-36	6.25741e-33	0.496963	0.00150427	1	0.09524	0.0118437	1	0.132155
cg15857635	1.07178e-16	8.56355e-14	0.342833	0.000293325	0.234367	0.108587	2.58512e-05	0.0206551	0.219191
cg15936446	8.36418e-34	6.68298e-31	0.483911	2.82938e-13	2.26067e-10	0.217001	5.68401e-12	4.54152e-09	0.351585
cg15970457	1.5352e-27	1.22662e-24	0.439643	0.0315711	1	0.0645899	0.000387707	0.309778	0.185515
cg15998686	6.79621e-19	5.43017e-16	0.365244	0.561526	1	0.0174601	0.0717686	1	0.0947512
cg16002887	6.2803e-21	5.01796e-18	0.384522	0.548247	1	0.0180559	0.0853703	1	0.0905465
cg16022049	1.45497e-16	1.16252e-13	-0.34142	8.29502e-05	0.0662772	0.117957	0.0107191	1	-0.133974
cg16058485	1.11293e-17	8.89228e-15	0.353084	0.272801	1	0.0329734	0.113385	1	0.0833524
cg16139785	1.11737e-22	8.9278e-20	0.400138	0.0386413	1	0.0621367	0.705146	1	0.0199544
cg16143325	2.85118e-19	2.27809e-16	0.368918	0.00263215	1	0.0902756	0.61904	1	0.026219
cg16164923	2.18362e-23	1.74471e-20	0.406236	0.000891908	0.712635	0.0996809	0.000208152	0.166314	0.193756
cg16262215	2.26666e-24	1.81106e-21	0.414494	0.0175162	1	0.0713602	0.471136	1	0.0379933
cg16373176	1.49684e-22	1.19598e-19	0.399032	5.66267e-05	0.0452447	0.120657	0.0191636	1	0.123068
cg16446346	2.3346e-19	1.86534e-16	0.369757	0.147156	1	0.043579	0.0451983	1	0.105336
cg16489193	1.47074e-33	1.17512e-30	0.482295	0.554974	1	0.0177532	0.000139065	0.111113	0.198923
cg16490191	2.21056e-16	1.76623e-13	0.339475	0.0237142	1	0.0679452	0.058411	1	0.0995699
cg16530128	2.19345e-20	1.75257e-17	0.3795	0.836693	1	0.00619939	0.504437	1	0.0351952
cg16541852	2.30826e-25	1.8443e-22	0.422597	3.79953e-10	3.03583e-07	0.18668	0.0003205	0.256079	0.188074
cg16549027	9.30889e-23	7.4378e-20	0.400826	0.00897289	1	0.07847	0.000613552	0.490228	0.179203
cg16552881	1.70575e-19	1.3629e-16	0.371069	0.0117987	1	0.0756263	0.0385693	1	0.108785
cg16559361	5.91055e-20	4.72253e-17	0.375456	0.0432503	1	0.0607361	1.2273e-05	0.00980616	0.227587
cg16580935	5.53751e-16	4.42447e-13	0.335156	0.000856931	0.684688	0.100014	0.00750924	1	0.140299
cg16626322	2.31671e-24	1.85105e-21	0.414416	0.723911	1	0.0106237	0.697779	1	-0.0204784
cg16668397	2.28446e-22	1.82528e-19	0.397426	8.47232e-07	0.000676938	0.147291	0.000296593	0.236978	0.189107
cg16760712	1.39e-20	1.11061e-17	0.381342	7.134e-06	0.00570006	0.134418	0.0207499	1	0.121512
cg16839815	3.32443e-18	2.65622e-15	0.358404	0.232124	1	-0.0359264	0.101027	1	0.0863286
cg16867657	3.11998e-50	2.49286e-47	0.576198	1.06071e-12	8.47509e-10	0.211779	1.29221e-17	1.03247e-14	0.428697
cg16894138	2.48821e-12	1.98808e-09	-0.291985	0.302809	1	0.0309838	0.839988	1	-0.0106486
cg16909962	1.91609e-27	1.53096e-24	0.438909	0.126959	1	0.0458781	3.80092e-06	0.00303694	0.240191
cg17022393	3.94736e-21	3.15394e-18	0.386365	1.45802e-05	0.0116496	0.129826	0.00273052	1	0.15706
cg17080740	1.54789e-23	1.23677e-20	0.407505	0.97606	1	-0.000902536	0.00115757	0.924898	0.170113
cg17110586	1.18593e-33	9.47557e-31	0.482912	9.76559e-08	7.80271e-05	0.159311	4.52383e-10	3.61454e-07	0.320137
cg17112707	3.87002e-19	3.09215e-16	0.367631	0.808983	1	-0.00727042	0.725936	1	0.0184862
cg17120578	2.21166e-26	1.76712e-23	0.430692	0.000297256	0.237507	0.108484	0.00224388	1	0.160131
cg17152322	1.12993e-17	9.02817e-15	0.353017	0.533488	1	0.0187264	0.000610461	0.487759	0.179274
cg17180088	2.88118e-23	2.30207e-20	0.405209	0.247389	1	0.0347789	0.0476235	1	0.104181
cg17233806	5.24443e-17	4.1903e-14	0.346109	0.000266018	0.212548	0.109338	0.00072373	0.57826	0.17688
cg17240133	3.25016e-19	2.59688e-16	0.368367	0.247988	1	-0.0347349	0.248594	1	0.060795
cg17243289	4.27201e-47	3.41334e-44	0.560651	1.47587e-13	1.17922e-10	0.219525	5.27134e-17	4.2118e-14	0.421259
cg17265115	6.15939e-25	4.92135e-22	0.419142	0.00093962	0.750757	0.0992461	0.136594	1	0.0783894
cg17284536	3.50585e-17	2.80117e-14	0.347938	0.887453	1	-0.00425659	0.743287	1	-0.0172716
cg17291767	2.60465e-18	2.08112e-15	0.359466	7.888e-07	0.000630251	0.147704	2.22464e-05	0.0177749	0.220909
cg17352276	6.78155e-31	5.41846e-28	0.464154	0.000115346	0.0921617	0.115579	6.33372e-05	0.0506065	0.20864
cg17425351	7.77675e-18	6.21362e-15	0.354673	0.555218	1	0.0177422	0.452555	1	0.0396017
cg17486066	4.36785e-17	3.48991e-14	0.346941	0.470386	1	0.0217079	0.00442259	1	0.149277
cg17490283	3.52908e-17	2.81974e-14	0.347908	0.00252469	1	0.0906536	0.721045	1	-0.0188302
cg17554182	1.93439e-20	1.54558e-17	0.380008	0.440266	1	-0.0232079	3.32776e-05	0.0265888	0.21627
cg17566735	1.01016e-15	8.07117e-13	-0.332291	0.658586	1	-0.013289	0.000671716	0.536701	-0.177933
cg17802216	3.43061e-18	2.74106e-15	0.358266	0.371719	1	-0.0268608	0.1253	1	0.0807151
cg17825770	9.06172e-25	7.24031e-22	0.417773	0.828447	1	0.00651723	0.631919	1	0.0252605
cg17864650	3.5219e-18	2.814e-15	0.358152	0.215609	1	0.0372299	0.0021264	1	0.160963
cg17935811	5.58568e-15	4.46296e-12	-0.323972	0.000316213	0.252654	-0.108006	0.442689	1	-0.0404708
cg17954142	5.74434e-23	4.58973e-20	0.402638	0.0040501	1	0.0862843	0.983968	1	-0.0010598
cg18086520	5.3488e-21	4.27369e-18	0.385161	0.0318106	1	0.0644995	0.00306303	1	0.155237
cg18159646	8.95441e-20	7.15457e-17	0.373744	0.000112549	0.0899267	0.115757	0.333883	1	0.050932
cg18234606	1.91469e-17	1.52984e-14	0.350663	0.387735	1	0.0259733	0.209911	1	0.0660552
cg18276125	2.4454e-19	1.95388e-16	0.369562	4.96285e-06	0.00396532	0.136693	8.70359e-09	6.95417e-06	0.296628
cg18366882	4.15988e-23	3.32374e-20	0.403843	0.425524	1	0.0239634	0.0456754	1	0.105105
cg18404335	2.10499e-20	1.68189e-17	0.379666	0.0751828	1	0.0534774	0.186277	1	0.0696221
cg18424850	5.71707e-19	4.56794e-16	0.365979	0.03224	1	0.0643388	0.0280819	1	0.11544
cg18468088	9.1383e-50	7.3015e-47	0.573937	7.36841e-12	5.88736e-09	0.203863	2.86426e-26	2.28854e-23	0.518236
cg18493314	1.60991e-22	1.28631e-19	0.398756	2.48332e-05	0.0198417	0.126302	0.0222643	1	0.120121
cg18536827	1.05387e-17	8.42044e-15	0.353327	0.205294	1	0.0380808	0.129062	1	0.0799232
cg18569335	4.70867e-39	3.76223e-36	0.516597	0.000471719	0.376903	0.104865	2.48935e-17	1.98899e-14	0.425251
cg18625289	6.19915e-18	4.95312e-15	0.355673	0.133262	1	0.0451321	0.330508	1	0.0512883
cg18662080	2.08907e-19	1.66917e-16	0.370222	0.0357365	1	0.0630941	0.0701095	1	0.0953075
cg18671115	5.22557e-17	4.17523e-14	0.346125	0.220539	1	0.0368335	0.149475	1	0.0759108
cg18725544	2.07372e-21	1.65691e-18	0.388901	0.848272	1	0.00575421	0.25466	1	0.0600235
cg18729787	5.3684e-25	4.28935e-22	0.419629	3.97624e-08	3.17701e-05	0.164054	0.000405541	0.324028	0.184906
cg18738985	6.44953e-16	5.15317e-13	0.334432	0.0111878	1	0.0761853	0.00497718	1	0.147315
cg18749411	1.49949e-19	1.1981e-16	0.371606	0.929087	1	-0.00267657	0.749695	1	0.0168254
cg18784113	1.57623e-19	1.2594e-16	0.371398	0.809625	1	0.00724553	0.957527	1	0.00280882
cg18825531	1.57097e-18	1.25521e-15	-0.361654	0.0813626	1	-0.0523815	0.13083	1	-0.079557
cg18831134	7.7338e-22	6.17931e-19	0.392743	0.0143863	1	0.0735106	0.000353779	0.282669	0.186751
cg18845578	8.98634e-16	7.18009e-13	0.332851	0.0523874	1	0.058296	4.21322e-06	0.00336637	0.239111
cg18861551	4.53962e-17	3.62716e-14	0.346766	0.224725	1	0.0365019	0.0283652	1	0.115234
cg18982384	6.09701e-18	4.87151e-15	0.355746	0.0030469	1	0.0889376	0.466429	1	0.0383973
cg19047670	6.23853e-20	4.98458e-17	0.375234	0.0759099	1	0.0533448	0.316542	1	0.0527882
cg19060970	1.67494e-38	1.33828e-35	0.513327	8.57012e-08	6.84753e-05	0.160009	0.000831204	0.664132	0.17491
cg19094872	2.09474e-21	1.6737e-18	0.388861	0.00594553	1	-0.0825909	0.705212	1	0.0199497
cg19122460	2.74591e-18	2.19398e-15	0.359236	0.00835196	1	0.0792009	0.00428737	1	0.149789
cg19273773	9.77266e-42	7.80836e-39	0.532027	6.98195e-06	0.00557858	0.134554	1.03689e-07	8.28479e-05	0.275156
cg19291355	1.37665e-48	1.09995e-45	0.568149	0.000745652	0.595776	0.101163	3.0491e-22	2.43623e-19	0.479816
cg19343530	2.93224e-25	2.34286e-22	0.421758	0.367399	1	0.0271042	1.37414e-06	0.00109794	0.250598
cg19410796	3.57887e-18	2.85951e-15	0.358082	0.00120527	0.963014	0.0971447	0.100857	1	0.0863714
cg19516374	9.4403e-20	7.5428e-17	0.373526	6.62589e-07	0.000529408	0.148706	0.000324987	0.259664	0.187889
cg19701014	3.65236e-20	2.91823e-17	0.377427	4.68063e-06	0.00373982	0.137056	0.0389213	1	0.108589
cg19736226	2.7491e-21	2.19653e-18	0.387793	2.61818e-06	0.00209193	0.140616	0.719312	1	0.0189523
cg19742341	5.03244e-26	4.02092e-23	0.427879	0.0022666	1	0.0916252	0.00449127	1	0.149023
cg19744398	9.31706e-20	7.44433e-17	0.37358	0.137976	1	0.0445917	0.525083	1	0.0335092
cg19746343	2.47021e-21	1.9737e-18	0.388214	3.91212e-06	0.00312578	0.138165	0.0157495	1	0.126838
cg19795722	1.22039e-16	9.75089e-14	0.342234	0.169229	1	-0.0413275	0.229252	1	0.0633465
cg19832832	9.02894e-23	7.21413e-20	0.400941	0.00484292	1	0.0845814	1.81232e-05	0.0144804	0.223234
cg19851222	5.12566e-25	4.0954e-22	0.419792	1.00242e-05	0.00800936	0.132251	1.21272e-05	0.0096896	0.227719
cg19864002	1.15503e-23	9.22871e-21	0.408581	0.00238147	1	0.0911809	0.00950028	1	0.136147
cg19908207	1.07972e-17	8.62693e-15	0.353219	0.00195342	1	0.0929505	0.788218	1	0.0141669
cg19937878	2.07076e-23	1.65453e-20	0.406432	3.50818e-05	0.0280303	0.123965	0.000275468	0.220099	0.190086
cg19996418	1.85687e-22	1.48364e-19	0.398214	0.00321562	1	0.0884405	8.87006e-07	0.000708718	0.254937
cg20005760	1.51475e-20	1.21028e-17	0.380996	0.924933	1	0.0028338	0.0380928	1	0.109051
cg20017995	1.07111e-22	8.55818e-20	0.400297	0.00148725	1	0.0953386	0.00623174	1	0.143517
cg20025677	2.73346e-16	2.18404e-13	0.338482	0.000266098	0.212613	0.109336	0.000708876	0.566392	0.177173
cg20063640	1.27711e-23	1.02041e-20	0.408212	7.50293e-08	5.99484e-05	0.160717	0.0167825	1	0.125627
cg20078454	9.65406e-22	7.71359e-19	0.391884	1.2187e-05	0.0097374	0.130992	9.42879e-08	7.53361e-05	0.276014
cg20080282	3.1838e-20	2.54386e-17	0.377986	0.00313789	1	0.0886665	0.475773	1	-0.0375974
cg20119148	1.34977e-52	1.07847e-49	0.58739	3.78842e-10	3.02695e-07	0.186693	1.07649e-06	0.000860118	0.253027
cg20143092	8.6805e-10	6.93572e-07	-0.256948	0.926563	1	-0.00277211	0.562631	1	-0.0305268
cg20167471	1.72161e-22	1.37556e-19	0.398501	0.127105	1	0.0458604	7.41553e-05	0.0592501	0.206728
cg20226327	5.10593e-22	4.07964e-19	0.394346	0.308995	1	0.0305902	0.00298472	1	0.155649
cg20308403	1.43982e-15	1.15042e-12	0.330588	0.000239487	0.19135	0.11014	0.866357	1	-0.00887554
cg20308540	1.01104e-36	8.07824e-34	0.502511	0.000484539	0.387147	0.104652	0.0149073	1	0.127877
cg20312457	4.79153e-18	3.82843e-15	0.356805	0.00932184	1	0.0780789	9.91194e-06	0.00791964	0.229938
cg20382028	5.68632e-21	4.54337e-18	0.384917	0.00273164	1	0.089938	0.0340552	1	0.111432
cg20436707	1.2838e-22	1.02576e-19	0.399613	0.210419	1	0.0376543	0.000742472	0.593235	0.176518
cg20490900	3.44052e-18	2.74897e-15	0.358254	2.0379e-05	0.0162828	0.127621	0.000130682	0.104415	0.199708
cg20518446	7.1968e-19	5.75024e-16	-0.365	0.240565	1	-0.0352855	0.000388068	0.310066	-0.185503
cg20543092	2.90353e-15	2.31992e-12	0.327185	0.0244214	1	0.0676067	0.915947	1	-0.00556628
cg20544516	1.72285e-20	1.37656e-17	0.380476	0.00692905	1	0.0810786	8.45067e-06	0.00675209	0.231676
cg20599086	1.30518e-17	1.04284e-14	0.352375	0.345552	1	0.0283636	0.153288	1	0.0752085
cg20663495	8.75757e-21	6.9973e-18	0.383195	0.000115807	0.0925298	0.11555	0.200395	1	0.0674543
cg20666186	2.46282e-25	1.96779e-22	0.42237	0.00552904	1	0.0833002	0.060155	1	0.0988923
cg20689661	1.67713e-18	1.34003e-15	0.361372	0.000169553	0.135473	0.112741	0.0546424	1	0.101094
cg20706495	6.19459e-16	4.94948e-13	-0.334624	0.00119856	0.95765	-0.0971922	7.94518e-10	6.3482e-07	-0.315816
cg20732137	8.31368e-15	6.64263e-12	0.322	0.0325593	1	0.0642204	0.0752364	1	0.0936216
cg20837354	4.13265e-21	3.30199e-18	0.386184	0.0143922	1	0.0735062	0.0346126	1	0.11109
cg20852557	1.14096e-21	9.11626e-19	0.391234	7.44988e-06	0.00595245	0.134144	0.000301834	0.241165	0.188874
cg20897936	9.16456e-24	7.32249e-21	0.409428	4.09054e-05	0.0326834	0.122913	6.21611e-05	0.0496667	0.208866
cg20898773	3.1556e-21	2.52132e-18	0.387249	0.00674085	1	0.0813524	0.13658	1	0.0783922
cg20940044	5.86742e-20	4.68807e-17	0.375486	0.00692403	1	0.0810858	0.102416	1	0.0859801
cg20941823	3.21553e-21	2.56921e-18	0.387175	0.000368493	0.294426	0.106815	0.0025285	1	0.158269
cg20953047	4.84169e-17	3.86851e-14	0.346473	0.0742136	1	0.0536559	0.144359	1	0.076875
cg20978460	8.68937e-20	6.94281e-17	0.373869	0.0537988	1	0.0579515	1.86527e-10	1.49035e-07	0.326798
cg21038418	5.02696e-20	4.01654e-17	0.37612	0.000882653	0.70524	0.0997677	0.00164804	1	0.164854
cg21089789	5.01434e-19	4.00646e-16	0.366535	0.107452	1	0.0483866	0.325794	1	0.0517899
cg21105175	7.63126e-21	6.09738e-18	0.383745	0.00818758	1	0.0794025	0.00361861	1	0.152558
cg21150839	6.83932e-20	5.46462e-17	0.374856	0.000613703	0.490348	0.102752	0.607979	1	0.0270492
cg21186299	3.16439e-30	2.52834e-27	0.459423	0.000165334	0.132102	0.112929	3.60437e-13	2.87989e-10	0.369739
cg21196551	8.05177e-20	6.43336e-17	0.374183	2.24338e-06	0.00179246	0.141548	0.00887782	1	0.137355
cg21230565	6.51892e-24	5.20862e-21	0.410672	3.04995e-05	0.0243691	0.124917	1.57239e-08	1.25634e-05	0.291663
cg21293117	1.33948e-19	1.07024e-16	0.372075	0.5675	1	0.0171943	0.516301	1	-0.0342221
cg21355793	3.49791e-22	2.79483e-19	0.395799	0.518438	1	-0.0194199	0.0159385	1	0.126611
cg21399778	5.82236e-19	4.65206e-16	0.365901	0.420986	1	-0.024199	0.867474	1	0.00880062
cg21442182	8.85358e-21	7.07401e-18	0.383152	0.162271	1	0.0420119	0.0218075	1	0.120531
cg21520772	1.49019e-20	1.19067e-17	0.381061	0.516931	1	-0.0194899	0.335397	1	0.0507729
cg21537049	2.27844e-20	1.82047e-17	0.379346	0.0468501	1	0.0597273	0.990454	1	0.000631034
cg21572722	2.89329e-25	2.31174e-22	0.421805	2.52332e-09	2.01613e-06	0.177821	0.00018504	0.147847	0.195277
cg21622381	1.47531e-16	1.17877e-13	0.341356	0.000276122	0.220622	0.109052	7.3618e-05	0.0588208	0.206816
cg21623865	1.83415e-44	1.46549e-41	0.546934	2.17378e-09	1.73685e-06	0.178535	3.22311e-19	2.57527e-16	0.447397
cg21632014	1.12919e-20	9.02222e-18	0.382177	0.13217	1	0.0452593	0.918785	1	0.00537768
cg21700723	6.5474e-21	5.23137e-18	0.384356	0.00028233	0.225581	0.108881	0.00386433	1	0.151491
cg21727223	1.79138e-20	1.43131e-17	-0.380319	0.00850083	1	-0.0790214	8.37475e-11	6.69143e-08	-0.332682
cg21787249	3.25384e-18	2.59982e-15	0.358497	0.274006	1	0.0328908	7.44163e-06	0.00594586	0.233053
cg21805880	7.60372e-18	6.07537e-15	0.354772	0.0419088	1	0.0611302	0.158984	1	0.0741835
cg21834048	1.06484e-15	8.50804e-13	0.332038	4.02482e-05	0.0321583	0.123024	0.026943	1	0.116286
cg21855910	5.93963e-24	4.74577e-21	0.41101	2.48021e-06	0.00198169	0.140943	1.21892e-06	0.000973918	0.251794
cg22016859	5.28009e-33	4.21879e-30	0.478603	0.00756528	1	0.0802	5.64708e-05	0.0451202	0.21002
cg22029284	1.13493e-18	9.06808e-16	0.363052	0.334895	1	-0.0289963	0.393588	1	-0.0449723
cg22108374	1.11212e-40	8.88587e-38	0.526047	1.06281e-06	0.000849181	0.145973	3.02052e-06	0.0024134	0.242583
cg22212250	1.18951e-29	9.5042e-27	0.455295	0.0079302	1	0.0797256	0.0125621	1	0.131071
cg22245862	4.44192e-21	3.5491e-18	0.385898	4.82256e-05	0.0385323	0.121776	0.00704316	1	0.141412
cg22273939	1.43786e-16	1.14885e-13	-0.341475	0.615766	1	-0.0150931	0.00321359	1	-0.15447
cg22322679	1.43054e-26	1.143e-23	0.432172	2.20366e-06	0.00176072	0.141655	0.0773116	1	0.0929657
cg22329027	4.02749e-20	3.21796e-17	0.377028	0.021249	1	0.069198	0.207971	1	0.0663366
cg22331349	3.13317e-35	2.5034e-32	0.493147	8.37284e-08	6.6899e-05	0.160133	3.80839e-14	3.0429e-11	0.383731
cg22340475	3.91386e-19	3.12717e-16	0.367583	0.204369	1	0.0381587	0.21561	1	0.0652392
cg22376805	7.03342e-19	5.6197e-16	0.365098	0.564457	1	0.0173296	0.0647005	1	0.0971992
cg22454769	1.4763e-40	1.17956e-37	0.525343	1.15237e-11	9.20747e-09	0.20199	6.0034e-16	4.79672e-13	0.407936
cg22599122	1.09818e-25	8.77446e-23	0.425185	0.519102	1	-0.0193891	0.551666	1	0.0313873
cg22622425	4.54563e-26	3.63196e-23	0.428229	0.00422179	1	0.0858914	0.000799338	0.638671	0.175469
cg22629266	3.27904e-16	2.61996e-13	0.337629	0.0315645	1	0.0645924	0.00980751	1	0.135577
cg22654656	1.59982e-21	1.27826e-18	0.389916	0.11652	1	0.0471796	0.0447832	1	0.105539
cg22658311	3.15001e-16	2.51686e-13	0.337817	0.101583	1	-0.0492115	0.000720698	0.575837	0.17694
cg22736354	1.15387e-61	9.21945e-59	0.626651	2.76947e-11	2.21281e-08	0.198265	5.54027e-19	4.42667e-16	0.444724
cg22796923	3.30711e-26	2.64238e-23	0.429319	0.594215	1	0.0160216	0.0317797	1	0.112882
cg22836769	1.20031e-22	9.59045e-20	0.399867	0.0107178	1	0.0766341	0.00508493	1	0.146957
cg22838685	9.72019e-18	7.76643e-15	0.353685	0.760599	1	0.00916381	0.248605	1	0.0607936
cg22876153	7.49811e-20	5.99099e-17	0.374477	4.87025e-05	0.0389133	0.121707	0.0133446	1	0.129951
cg22909935	1.10474e-13	8.82687e-11	0.308806	0.0163168	1	0.0721411	0.00468772	1	0.148313
cg22912214	2.51035e-20	2.00577e-17	0.378953	0.000729377	0.582772	0.101344	0.000892713	0.713277	0.173887
cg22930390	1.57471e-23	1.25819e-20	0.407442	0.00309208	1	0.0888021	0.00619744	1	0.143612
cg22931466	2.87288e-22	2.29543e-19	0.396552	3.94129e-05	0.0314909	0.123168	0.421087	1	0.0424131
cg22964621	2.00577e-19	1.60261e-16	0.370392	0.93491	1	-0.00245629	0.0969257	1	-0.08738
cg23022057	7.07993e-22	5.65686e-19	0.393085	0.44083	1	-0.0231793	0.0575448	1	0.0999127
cg23104816	5.56865e-20	4.44935e-17	0.375701	6.81392e-06	0.00544432	0.134707	0.0805333	1	0.0919751
cg23193410	2.0764e-22	1.65904e-19	0.397789	8.91822e-05	0.0712566	0.117438	8.21708e-06	0.00656545	0.231981
cg23193759	3.20582e-48	2.56145e-45	0.566321	9.81778e-10	7.84441e-07	0.182293	5.73248e-15	4.58025e-12	0.395022
cg23239690	6.51805e-24	5.20793e-21	0.410672	0.000385295	0.307851	0.106465	0.12915	1	0.0799047
cg23240477	9.03073e-19	7.21555e-16	0.364031	2.65055e-06	0.00211779	0.140541	0.0128448	1	0.13066
cg23259527	7.0983e-19	5.67154e-16	0.365058	0.00316395	1	0.0885901	0.00885427	1	0.137402
cg23264016	6.68574e-19	5.34191e-16	0.365313	0.000682836	0.545586	0.101884	0.0291987	1	0.114638
cg23275972	2.5754e-16	2.05774e-13	0.338761	0.170076	1	0.0412455	0.11996	1	0.0818718
cg23314364	9.26416e-16	7.40206e-13	-0.332705	0.434349	1	0.0235094	0.0339138	1	-0.11152
cg23344241	1.67688e-19	1.33982e-16	0.37114	0.00106605	0.851776	0.0981856	0.892736	1	-0.00711173
cg23367683	1.46003e-22	1.16656e-19	0.399126	0.00365545	1	0.087248	0.444348	1	0.0403239
cg23386779	6.46427e-20	5.16495e-17	0.375088	7.73662e-05	0.0618156	0.118454	1.00026e-08	7.99204e-06	0.295469
cg23423191	7.1275e-18	5.69488e-15	0.355058	2.38024e-07	0.000190181	0.154466	0.0887959	1	0.0895737
cg23436042	9.59031e-20	7.66266e-17	0.373461	0.147745	1	0.0435157	0.0351766	1	0.110748
cg23479065	5.04184e-19	4.02843e-16	0.366512	0.00700426	1	0.0809711	0.000339003	0.270864	0.187323
cg23500537	3.04694e-33	2.43451e-30	0.480196	1.02417e-09	8.18309e-07	0.182095	9.90215e-11	7.91182e-08	0.331462
cg23507761	1.73883e-21	1.38932e-18	0.389591	0.280432	1	0.032454	0.0171676	1	0.125193
cg23532985	6.05715e-20	4.83966e-17	0.375355	0.0510499	1	0.0586297	0.00379683	1	0.151778
cg23558337	7.50289e-17	5.99481e-14	-0.344472	0.0163054	1	0.0721487	0.0954234	1	-0.087774
cg23575858	1.18015e-12	9.4294e-10	0.296115	1.19061e-09	9.51296e-07	0.181388	0.00926071	1	0.136603
cg23586440	8.5649e-25	6.84335e-22	0.417973	0.0493212	1	0.059072	0.0208367	1	0.12143
cg23606718	1.04149e-79	8.32147e-77	0.691033	6.04543e-17	4.8303e-14	0.247638	8.9718e-28	7.16847e-25	0.531422
cg23674189	1.27456e-24	1.01837e-21	0.416557	0.0236021	1	0.0679997	0.00955198	1	0.13605
cg23796243	1.38621e-27	1.10758e-24	0.43998	0.00454605	1	0.0851872	2.09875e-05	0.016769	0.221573
cg23800169	5.73506e-20	4.58231e-17	0.37558	7.62787e-06	0.00609467	0.133994	0.000186179	0.148757	0.195198
cg23854009	2.61819e-39	2.09193e-36	0.518097	0.00143794	1	0.0956303	2.05237e-21	1.63984e-18	0.471276
cg23855818	3.48468e-18	2.78426e-15	0.358198	0.780952	1	0.00836337	0.294833	1	0.0552084
cg23907852	7.03695e-21	5.62253e-18	0.384069	0.0143802	1	0.0735152	0.0208857	1	0.121384
cg23995914	2.10228e-28	1.67972e-25	0.446144	7.06899e-14	5.64812e-11	0.222342	1.62701e-12	1.29998e-09	0.359962
cg23998119	1.22984e-31	9.82644e-29	0.469314	8.17974e-06	0.00653561	0.133551	2.17598e-12	1.73861e-09	0.358037
cg23999833	5.45224e-21	4.35634e-18	0.385085	0.00269997	1	0.0900442	6.75925e-05	0.0540064	0.207853
cg24027320	6.78334e-21	5.41989e-18	0.384215	0.000914717	0.730859	0.0994704	2.1334e-06	0.00170458	0.246155
cg24027742	3.26029e-23	2.60497e-20	0.40475	1.30944e-08	1.04625e-05	0.169735	0.00162681	1	0.165049
cg24105287	2.56275e-18	2.04764e-15	-0.359536	0.458139	1	-0.0223111	0.0311601	1	-0.113292
cg24137448	3.86741e-24	3.09006e-21	0.412567	0.0196183	1	0.0700982	0.935857	1	0.00424449
cg24170085	3.19497e-15	2.55278e-12	-0.326718	0.697752	1	-0.0116798	0.0838479	1	-0.0909889
cg24204847	8.36189e-18	6.68115e-15	0.354352	2.60539e-05	0.020817	0.12598	0.0360945	1	0.110201
cg24314434	2.62459e-26	2.09705e-23	0.430109	0.0204334	1	0.0696404	0.166661	1	0.0728449
cg24315421	3.7844e-34	3.02374e-31	-0.486167	0.000107266	0.0857054	-0.116107	3.7557e-11	3.0008e-08	-0.338452
cg24315710	1.42707e-14	1.14023e-11	0.319298	0.0211271	1	-0.0692632	0.61573	1	0.0264668
cg24358467	1.33027e-24	1.06288e-21	0.416404	0.962704	1	-0.00140638	0.012795	1	0.130731
cg24406771	2.79193e-25	2.23075e-22	0.42193	2.41988e-05	0.0193348	0.126475	0.00126878	1	0.168762
cg24459227	8.80651e-21	7.0364e-18	0.383173	0.00155569	1	0.0949482	0.380115	1	0.0462654
cg24510397	1.47362e-17	1.17742e-14	0.351834	7.99968e-09	6.39174e-06	0.172195	5.00259e-05	0.0399707	0.211469
cg24570912	3.75587e-19	3.00094e-16	0.367757	3.45886e-06	0.00276363	0.138921	0.192792	1	-0.0686074
cg24585690	7.01107e-18	5.60185e-15	0.355131	0.30782	1	0.0306646	0.114925	1	0.0829998
cg24607283	2.61133e-29	2.08645e-26	0.452817	0.00319395	1	-0.0885029	0.0502756	1	0.102972
cg24616382	3.49707e-17	2.79416e-14	0.347949	1.51523e-05	0.0121066	0.129574	0.0254105	1	0.117474
cg24701662	3.94467e-18	3.15179e-15	0.357657	0.00021508	0.171849	0.110956	0.00388547	1	0.151402
cg24723690	6.32252e-20	5.0517e-17	0.375179	0.0893489	1	0.0510611	0.0742609	1	0.093935
cg24888989	3.6926e-38	2.95039e-35	0.511271	1.28306e-18	1.02516e-15	0.260306	3.83203e-25	3.0618e-22	0.50797
cg24895178	1.81126e-18	1.4472e-15	0.36104	6.88311e-05	0.054996	0.119284	0.0646247	1	0.0972267
cg25090514	1.96628e-54	1.57106e-51	0.595795	0.000160777	0.128461	0.113136	4.61013e-20	3.6835e-17	0.456804
cg25178784	6.0501e-20	4.83403e-17	0.37536	0.0208838	1	0.0693943	6.90758e-06	0.00551916	0.233855
cg25188724	2.02427e-18	1.61739e-15	0.360559	6.98061e-07	0.00055775	0.148407	0.000546012	0.436263	0.180827
cg25202261	1.88316e-15	1.50465e-12	0.32929	0.0155099	1	0.0726952	0.958098	1	-0.00277105
cg25245569	1.87987e-12	1.50202e-09	0.293545	0.000694077	0.554568	0.10175	8.34881e-05	0.066707	0.205279
cg25264630	1.15248e-20	9.2083e-18	0.382095	0.0877155	1	0.0513232	0.885289	1	-0.00760873
cg25284213	1.34551e-20	1.07506e-17	0.381473	0.0180315	1	-0.0710391	0.932302	1	-0.00448031
cg25319233	7.30526e-21	5.8369e-18	0.38392	7.59269e-05	0.0606656	0.118588	0.0543388	1	0.10122
cg25323057	2.54592e-17	2.03419e-14	-0.349382	0.0702517	1	-0.0544059	1.6475e-05	0.0131635	-0.224307
cg25410668	4.37187e-36	3.49312e-33	0.498554	1.31229e-12	1.04852e-09	0.210925	1.25444e-05	0.0100229	0.227345
cg25427880	4.30183e-40	3.43716e-37	0.522668	0.000730627	0.583771	0.10133	1.42985e-09	1.14245e-06	0.311232
cg25467652	1.23346e-16	9.85537e-14	-0.342184	4.74708e-05	0.0379292	-0.121885	0.10306	1	-0.0858198
cg25478614	5.71187e-51	4.56379e-48	0.579736	9.53298e-06	0.00761685	0.132574	2.00354e-13	1.60083e-10	0.37346
cg25575532	1.39065e-19	1.11113e-16	0.371919	0.666649	1	-0.0129548	0.627107	1	0.0256176
cg25580076	1.98488e-23	1.58592e-20	0.406588	9.63081e-07	0.000769502	0.146547	0.00376158	1	0.151929
cg25590826	2.47481e-27	1.97737e-24	0.43806	8.09846e-06	0.00647067	0.133614	1.66893e-05	0.0133347	0.224162
cg25634000	2.85824e-23	2.28374e-20	0.405239	1.2758e-06	0.00101936	0.144903	0.00020984	0.167662	0.193651
cg25636481	2.25529e-21	1.80198e-18	0.388571	1.39004e-06	0.00111064	0.144398	0.069291	1	0.0955859
cg25690537	1.98062e-17	1.58252e-14	0.350511	0.0544444	1	-0.0577964	0.159192	1	0.0741466
cg25744613	1.3191e-14	1.05396e-11	-0.319693	0.0734027	1	0.0538067	0.0430291	1	-0.106415
cg25865120	2.39796e-21	1.91597e-18	0.38833	0.5469	1	-0.0181167	0.912682	1	0.00578336
cg25876227	1.1414e-19	9.11978e-17	0.37274	0.0268456	1	0.0665072	0.0100793	1	0.135086
cg25966649	8.99841e-18	7.18973e-15	0.354027	0.347455	1	0.0282519	0.0478041	1	0.104097
cg26028489	7.34447e-17	5.86823e-14	0.34457	0.0308476	1	0.0648668	0.650513	1	0.023891
cg26066433	1.61676e-18	1.29179e-15	0.36153	0.00327581	1	0.0882688	0.239089	1	0.0620307
cg26140475	4.22197e-24	3.37335e-21	-0.41225	0.344221	1	-0.0284419	5.25146e-09	4.19592e-06	-0.300795
cg26182780	6.92619e-18	5.53403e-15	0.355184	0.0735849	1	0.0537727	0.0399343	1	0.108036
cg26195652	1.35099e-20	1.07944e-17	0.381456	9.26402e-05	0.0740195	0.117165	0.00168488	1	0.164519
cg26268968	9.93909e-29	7.94134e-26	0.448558	0.0381561	1	0.0622923	0.0885197	1	0.089651
cg26279371	7.02975e-17	5.61677e-14	0.344771	0.000907673	0.725231	0.0995349	0.000190565	0.152261	0.194898
cg26283098	7.40375e-18	5.9156e-15	0.35489	0.684674	1	0.0122132	0.0111809	1	0.133207
cg26307701	7.56389e-22	6.04355e-19	0.392829	0.0711946	1	0.0542243	0.661238	1	0.0231084
cg26318502	3.82351e-19	3.05498e-16	0.367682	0.0480901	1	-0.0593949	0.802355	1	-0.0132006
cg26328951	4.14113e-20	3.30876e-17	0.376914	4.45502e-06	0.00355956	0.137362	9.24481e-05	0.073866	0.204024
cg26330304	3.05181e-16	2.4384e-13	0.337966	0.836942	1	0.00618979	0.0524346	1	0.102027
cg26427827	2.85267e-17	2.27929e-14	0.34887	0.539668	1	-0.0184445	0.702563	1	-0.0201379
cg26518431	1.18501e-23	9.46821e-21	0.408487	1.35491e-07	0.000108257	0.157548	0.269661	1	-0.0581687
cg26522319	5.66371e-33	4.52531e-30	0.478399	3.28507e-10	2.62477e-07	0.187343	6.09727e-15	4.87172e-12	0.394661
cg26546113	1.79666e-17	1.43553e-14	0.350948	1.08493e-05	0.00866856	0.131743	0.000522281	0.417303	0.181442
cg26548187	6.9951e-18	5.58908e-15	0.355141	0.0831434	1	0.0520783	0.0581574	1	0.0996699
cg26568075	6.13389e-21	4.90098e-18	0.384616	0.0139425	1	0.0738482	3.42543e-07	0.000273692	0.264106
cg26605700	1.85954e-23	1.48577e-20	0.406829	0.021073	1	0.0692922	0.533937	1	0.0327966
cg26627327	9.51639e-20	7.60359e-17	0.373493	7.1639e-06	0.00572396	0.134391	0.332607	1	0.0510664
cg26638341	5.38096e-21	4.29938e-18	0.385137	0.021057	1	0.0693008	0.0601402	1	0.0988979
cg26652413	7.89332e-16	6.30676e-13	-0.33347	0.000166934	0.13338	-0.112857	0.00244846	1	-0.158772
cg26711406	4.19588e-21	3.35251e-18	0.386123	0.000857504	0.685146	0.100008	0.0501738	1	0.103018
cg26734668	1.50465e-32	1.20222e-29	0.475544	0.741806	1	0.00990869	0.000129415	0.103403	0.199831
cg26776924	4.32821e-21	3.45824e-18	0.386	0.000125234	0.100062	0.114978	0.0477914	1	0.104103
cg26792755	7.30419e-51	5.83605e-48	0.579226	4.38354e-18	3.50245e-15	0.256342	1.51738e-21	1.21239e-18	0.472645
cg26830108	5.8115e-61	4.64339e-58	0.623801	2.11504e-06	0.00168992	0.141902	6.7348e-17	5.3811e-14	0.419943
cg26856080	1.98855e-40	1.58885e-37	0.5246	0.00754075	1	-0.0802327	5.55922e-08	4.44181e-05	0.280731
cg26866474	1.271e-19	1.01553e-16	0.372293	0.368303	1	0.0270531	0.0203326	1	0.121911
cg26875852	1.49587e-19	1.1952e-16	0.371616	0.0118844	1	-0.0755499	0.311042	1	0.0533908
cg26884787	3.12366e-22	2.4958e-19	0.396232	0.00178224	1	0.0937597	0.974023	1	-0.00171739
cg26913669	1.87508e-24	1.49819e-21	0.415176	0.061692	1	-0.0561528	0.00238574	1	0.159177
cg26921969	4.32699e-53	3.45727e-50	0.589676	1.01518e-08	8.11128e-06	0.17101	6.52029e-14	5.20971e-11	0.380444
cg26933107	1.615e-24	1.29038e-21	0.415711	0.00394754	1	0.0865263	0.000655267	0.523559	0.178281
cg27011829	8.094e-18	6.46711e-15	0.354496	2.41348e-05	0.0192837	0.126493	9.93959e-05	0.0794173	0.203128
cg27039821	4.16635e-18	3.32891e-15	0.357417	0.778643	1	0.00845385	0.0114738	1	0.132736
cg27052183	5.31119e-19	4.24364e-16	0.366291	0.000272085	0.217396	0.109165	0.00076662	0.612529	0.176064
cg27179571	1.77402e-28	1.41744e-25	0.446693	0.000978463	0.781792	0.0989069	0.0320603	1	0.112699
cg27181375	2.10562e-11	1.68239e-08	-0.279775	0.00297473	1	0.089158	0.708752	1	-0.0196987
cg27224971	1.28438e-21	1.02622e-18	0.390773	0.355072	1	0.0278088	0.00109886	0.877989	0.170875
cg27320127	2.5252e-33	2.01763e-30	0.480739	2.82126e-13	2.25419e-10	0.217013	6.62193e-14	5.29092e-11	0.380349
cg27338302	2.18874e-19	1.7488e-16	0.370027	0.00498274	1	0.0843075	0.0176939	1	0.124612
cg27391127	2.51721e-18	2.01125e-15	0.359614	0.00582551	1	-0.0827906	0.146832	1	-0.0764058
cg27426151	4.0161e-20	3.20886e-17	0.377039	0.776896	1	-0.00852237	7.23621e-05	0.0578173	0.207026
cg27451587	3.34086e-18	2.66935e-15	0.358382	0.0340202	1	0.0636914	0.149932	1	0.075826
cg27541691	7.30955e-40	5.84033e-37	0.521334	2.67921e-10	2.14069e-07	0.188268	7.58394e-11	6.05956e-08	0.333402
cg27545630	3.83075e-23	3.06077e-20	0.40415	0.000216048	0.172622	0.110922	1.11011e-05	0.00886977	0.228694
cg27658391	2.67254e-22	2.13536e-19	0.396828	1.57253e-05	0.0125645	0.129331	6.72198e-07	0.000537086	0.257646
cg27665659	4.86774e-31	3.88933e-28	0.465163	0.0223877	1	0.0686045	2.68342e-13	2.14405e-10	0.371614

## Sheet: Supplementary Table 9
	UCSC_RefGene_Name	Correlation with age
cg00021762		Positive
cg00028336	SORBS2	Negative
cg00066663	CHD3;CHD3;CHD3	Negative
cg00085493		Negative
cg00090787	RPL4;SNORD16;SNORD18B	Positive
cg00162859	ASAP1	Positive
cg00175153	SNORA10;RPS2	Positive
cg00180930	VARS	Positive
cg00181419	ANKS3	Positive
cg00241281	PACS2;PACS2	Negative
cg00252781	C1orf125;C1orf125	Positive
cg00330825	RPLP2;SNORA52	Negative
cg00345025		Positive
cg00387551	PRDM16;PRDM16	Negative
cg00458351		Negative
cg00460776		Positive
cg00483825	C10orf93	Positive
cg00529757	AGPAT1;AGPAT1;EGFL8	Negative
cg00532335	LGI1	Negative
cg00584026	TMEM175	Negative
cg00590036	TMEM181	Positive
cg00593900	ANGPTL6	Positive
cg00601711	SLC12A7	Positive
cg00624037		Positive
cg00633969	PARP9;PARP9;PARP9;PARP9;PARP9;DTX3L;PARP9	Positive
cg00667298	GABBR1;GABBR1;GABBR1	Negative
cg00702638	KIF15;KIF15;KIAA1143	Positive
cg00728585	FAM108C1	Negative
cg00741992		Negative
cg00743094	CLYBL	Positive
cg00748589		Positive
cg00786909	CABC1	Negative
cg00818822	RFX2;RFX2	Positive
cg01010923	SNORD115-39	Negative
cg01014113	EEF1D;EEF1D;EEF1D;EEF1D;EEF1D;EEF1D;EEF1D	Negative
cg01044580	CHD8;CHD8	Negative
cg01071511	MAD1L1;MAD1L1;MAD1L1	Negative
cg01140247	C10orf11	Negative
cg01153946	LOC388796;SNORA71D;LOC388796	Negative
cg01154248	MAD1L1;MAD1L1;MAD1L1	Negative
cg01155404	WDR45L	Positive
cg01247693	NPAS2	Positive
cg01329687	SNN	Positive
cg01346152	DHRS3	Negative
cg01346501	NR1D1	Negative
cg01386314	C17orf101;C17orf101	Positive
cg01410314	C9orf41	Negative
cg01430430	SRRM3	Negative
cg01431482	PRDM16;PRDM16	Negative
cg01511742	FOXP1	Negative
cg01512113		Negative
cg01667185	PC;PC;LRFN4;PC	Negative
cg01671895	PGR	Negative
cg01692482	ZNF217	Negative
cg01710607	GAP43;GAP43	Negative
cg01765641	TBC1D5;TBC1D5;TBC1D5	Negative
cg01810111		Positive
cg01831657	COL23A1	Positive
cg01845501		Positive
cg01868791		Positive
cg01890836	MPRIP;MPRIP	Negative
cg01908954	SCG3;SCG3;SCG3;SCG3	Negative
cg01910125	TBC1D16	Positive
cg01912040		Positive
cg01933709		Positive
cg01939535		Positive
cg02049979	MFHAS1	Positive
cg02076355	C10orf10;RASSF4	Negative
cg02094337	FOXK2	Positive
cg02118776	AARS2	Positive
cg02128483	AP2A2	Positive
cg02137984	TNF	Positive
cg02189888		Positive
cg02202502	LOC732275	Positive
cg02250501		Positive
cg02262037	FAM172A;FAM172A;FAM172A;FAM172A	Positive
cg02301019		Positive
cg02331561	ABCA17P;ABCA3	Positive
cg02337695		Negative
cg02376097	DMPK;DMPK;DMPK;DMPK	Negative
cg02402882		Negative
cg02404377	NAV2;NAV2;NAV2;NAV2	Negative
cg02458141	HS1BP3	Negative
cg02566157	VWCE	Positive
cg02583228	GABRB3;GABRB3	Negative
cg02626307	CCT3;CCT3;CCT3;C1orf182	Positive
cg02732508	RPL13;RPL13	Positive
cg02735684	SNX29	Negative
cg02751838	LDHD;LDHD	Negative
cg02821342	MKLN1;FLJ43663	Negative
cg02858808	CUX1;CUX1;CUX1	Negative
cg02895699	AFAP1;AFAP1	Positive
cg02903756	CASZ1;CASZ1	Positive
cg02911270	EIF2C2;EIF2C2	Positive
cg02951274	RGS12;RGS12;RGS12	Negative
cg02993699	RGS12;RGS12;RGS12	Positive
cg03020208	AQP5	Negative
cg03036557	GPC5	Positive
cg03043671	BRD3	Positive
cg03078672		Negative
cg03092482	TBC1D16	Negative
cg03289072	MRC2	Positive
cg03303325	TBCD	Negative
cg03339956	TCF7L2;TCF7L2;TCF7L2;TCF7L2;TCF7L2;TCF7L2	Negative
cg03341233	IDUA	Negative
cg03366992	PDXK	Negative
cg03370704	LOC728264	Negative
cg03406993	SLC45A1	Positive
cg03465682		Negative
cg03495084	SH3BP5;SH3BP5	Negative
cg03503871	ZNF689	Negative
cg03539717	GADD45GIP1	Negative
cg03545227	PTPRN	Positive
cg03553786	LOC285375	Positive
cg03555227	RANBP17	Positive
cg03570232		Positive
cg03576555	CTBP2;CTBP2	Positive
cg03588966	ITPRIP	Negative
cg03594801	TBC1D16	Positive
cg03610636	CELSR1	Negative
cg03657791	BRD4	Negative
cg03661054	TSSC1	Positive
cg03702686	B3GALT4;RPS18	Positive
cg03837111	SLC35C2;SLC35C2;SLC35C2	Positive
cg03842205	C7orf20	Positive
cg03900492	PTPRN2;PTPRN2;PTPRN2	Negative
cg03972505	LOC728661;CDK11B;CDK11B;CDK11B;CDK11B;CDK11B;CDK11B	Positive
cg04023742	ANKLE2	Positive
cg04065767	JAKMIP3	Positive
cg04084157	VGF	Positive
cg04117455	ZFYVE21	Positive
cg04177015	MC1R	Negative
cg04212239	SMC4;SMC4	Positive
cg04258676		Negative
cg04271792		Positive
cg04322596	TCF7L2;TCF7L2;TCF7L2;TCF7L2;TCF7L2;TCF7L2	Negative
cg04326566	CUX1;CUX1;CUX1	Negative
cg04368796	NKIRAS2;NKIRAS2;NKIRAS2;NKIRAS2;NKIRAS2	Positive
cg04436083	DHX15	Negative
cg04437845	TTC7A	Negative
cg04582295	SGCA;SGCA	Positive
cg04622775	MFGE8;MFGE8	Negative
cg04642105	CTBP1;CTBP1	Positive
cg04645070		Negative
cg04682699	SLC38A3	Negative
cg04684152		Negative
cg04684267	ZNF274;ZNF274;ZNF274;ZNF274;ZNF274;ZNF274	Positive
cg04738827	C2orf68	Positive
cg04743859	TCIRG1;TCIRG1	Positive
cg04767507	ZMIZ1	Negative
cg04845871		Negative
cg04880546		Positive
cg04881751	INPP5A	Negative
cg04885315	CGNL1	Negative
cg04908961	MIR17HG;MIR92A1;MIR17HG;MIR20A;MIR19B1	Negative
cg04945634	UBE2O	Positive
cg04965094	GTF2F2	Negative
cg05031424	SLC16A11	Negative
cg05031801	HINFP;HINFP	Negative
cg05092960		Positive
cg05105477	CACNB4;CACNB4;CACNB4	Negative
cg05169099	SLC9A3	Positive
cg05202073	TSNARE1	Negative
cg05228359		Negative
cg05238606	TMCO7	Negative
cg05240712	CAPN10;CAPN10;CAPN10;CAPN10	Positive
cg05240982	TRIM27	Positive
cg05262711	SRRM2	Negative
cg05522415	QARS	Negative
cg05525368	CDC20	Positive
cg05532093	NFATC1;NFATC1;NFATC1;NFATC1;NFATC1	Positive
cg05537316	SEMA7A;SEMA7A;SEMA7A	Negative
cg05539847	HSD3B7;HSD3B7;HSD3B7;SETD1A	Negative
cg05558539	NCOR2;NCOR2	Positive
cg05637113	SRFBP1	Positive
cg05638500		Negative
cg05640731	KNDC1	Negative
cg05641843	EIF4A1;SNORA48	Positive
cg05703211	LRRC8D;LRRC8D	Negative
cg05708550	KDM3B	Positive
cg05713044	MYO10	Positive
cg05726118	CTNNB1;CTNNB1;CTNNB1	Negative
cg05767015	CHIT1	Negative
cg05813616	MYLK3	Negative
cg05901613		Positive
cg05917988	AARS2	Positive
cg05949889		Negative
cg05961176	APOB	Negative
cg06015142	CCDC146	Negative
cg06030846	TMEM108;TMEM108	Negative
cg06062998	LARP1;LARP1	Negative
cg06078335		Negative
cg06084073	PAK6;C15orf56;PAK6;PAK6	Negative
cg06121469	SPG11;SPG11	Positive
cg06128142	GPT2;GPT2	Positive
cg06166915	CX3CL1	Negative
cg06182121	PRDM16;PRDM16	Positive
cg06191348	DUS1L	Negative
cg06202426	FBXW5	Negative
cg06212670	ZFPM1	Positive
cg06313507	PGBD5	Positive
cg06319762	RPS2;RNF151	Positive
cg06335143	ZYG11A	Positive
cg06340161	GPT2;GPT2	Positive
cg06359056		Negative
cg06413794	AACS	Negative
cg06430772	AGAP1;AGAP1	Negative
cg06442489	ZSCAN18;ZSCAN18	Positive
cg06453088	CRMP1;CRMP1	Positive
cg06454901		Negative
cg06458239	ZNF549	Positive
cg06475223	LAMA3;LAMA3;LAMA3;LAMA3	Positive
cg06508005	RPL18AP3;SNORA68;RPL18A	Negative
cg06530983		Negative
cg06539449	CCND1	Negative
cg06545359	BANP;BANP	Positive
cg06555661	SFRS8	Positive
cg06568490	HDAC11;HDAC11	Negative
cg06617217	CNPY2	Negative
cg06621425	PTPRN2;PTPRN2;PTPRN2	Positive
cg06637032	CCDC85C	Positive
cg06639320	FHL2;FHL2;FHL2;FHL2	Positive
cg06648759		Positive
cg06660057	FOXK1	Positive
cg06669056	EVC2;EVC2	Positive
cg06737494	GHSR;GHSR	Positive
cg06739752		Negative
cg06748146	HK1;HK1;HK1;HK1;HK1	Positive
cg06852243	DNAH9	Positive
cg06915470	SEMA6B	Negative
cg06922393	CLPB	Negative
cg06955716	SLC39A9	Positive
cg06973176	SLC12A7	Negative
cg07028415	SLC22A23;SLC22A23	Negative
cg07066898	UNC13A	Positive
cg07077735	FUK	Positive
cg07078958	SH3BP5;SH3BP5	Negative
cg07099121	DHCR7;DHCR7	Negative
cg07131274	TSSC1	Positive
cg07168930	TCF7L2;TCF7L2;TCF7L2;TCF7L2;TCF7L2;TCF7L2	Negative
cg07177395	NRXN3;NRXN3;NRXN3	Negative
cg07196505	A2BP1;A2BP1;A2BP1;A2BP1;A2BP1;A2BP1	Positive
cg07220152		Negative
cg07220650	PEX10;RER1;PEX10	Positive
cg07224469	PCGF3	Negative
cg07268240		Negative
cg07303143	KIAA1143;KIF15	Positive
cg07339155	PHRF1	Positive
cg07392449	FAM167A	Positive
cg07437263	CDK5R1	Negative
cg07461273	MCM7;MCM7	Negative
cg07477924	MVP;MVP	Negative
cg07547549	SLC12A5;SLC12A5	Positive
cg07558209		Negative
cg07563882	NXN	Positive
cg07568015	ARNTL;ARNTL;ARNTL	Negative
cg07570470		Positive
cg07589899		Positive
cg07614623		Negative
cg07665115	OC90	Negative
cg07668993	SLPI	Negative
cg07719077	KIAA1211	Negative
cg07735777	MRPS33;MRPS33	Positive
cg07744216	KIAA1543;KIAA1543	Positive
cg07760161	TP53;WRAP53;TP53;TP53;TP53	Positive
cg07788865		Negative
cg07890839	SMAD3	Negative
cg07936585		Negative
cg07966572	ZNF777	Positive
cg07993350	FGFBP1	Negative
cg08024169		Negative
cg08097417	KLF14	Positive
cg08111414	KIAA0182;KIAA0182	Positive
cg08140609	SSU72	Positive
cg08173649		Negative
cg08216943		Negative
cg08223225	FHIT;FHIT	Positive
cg08231664	DYNC1H1	Negative
cg08285489	INSR;INSR	Positive
cg08318076		Positive
cg08343600	HNRNPF;HNRNPF;HNRNPF;HNRNPF;HNRNPF	Negative
cg08367318	C6orf27	Positive
cg08374494	ZFPM1	Positive
cg08459783	MXD4	Negative
cg08491437	FUBP1	Positive
cg08520742	KDM2B;KDM2B	Negative
cg08526705	MYC	Positive
cg08568298	LOC100128977;IMP5	Negative
cg08622677	PRMT8	Positive
cg08694014	SMPD3	Positive
cg08739115	PRDM16;PRDM16	Negative
cg08767838		Negative
cg08827700	SLC22A18;SLC22A18;SLC22A18AS	Negative
cg08904363	NAPEPLD;NAPEPLD	Positive
cg08946658	DARS	Negative
cg08951273	C6orf15	Positive
cg08983186	VARS	Positive
cg09080114	SPSB2;SPSB2	Negative
cg09329097	PNPT1	Negative
cg09357795	KIAA0562	Positive
cg09429847	AQP12A	Negative
cg09445967	ZP1	Negative
cg09489470		Negative
cg09548403		Negative
cg09576649	C20orf112	Positive
cg09609051	DPF2	Positive
cg09623845	LRRN1	Negative
cg09650907	FAM104A;FAM104A	Negative
cg09665406		Positive
cg09673570	MICALCL	Positive
cg09730123	SPSB3	Negative
cg09746086	INPP5A	Negative
cg09774649	C4orf23	Positive
cg09813986	ZFR	Positive
cg09862914	EXOC8	Positive
cg09864457	GRIK5	Positive
cg09868882	GRM8;GRM8;GRM8	Negative
cg10006887	MIR377	Negative
cg10009224	PCGF3	Positive
cg10016004	OTUD3	Positive
cg10021411	VSIG8	Negative
cg10048490	KIAA0182;KIAA0182	Positive
cg10161194	EEF2;SNORD37	Positive
cg10192641	COPS6	Negative
cg10200001		Negative
cg10207362	INPP5A	Negative
cg10234511	CASZ1;CASZ1	Negative
cg10296867	GAS7	Negative
cg10317815		Negative
cg10477073	PITPNM2	Positive
cg10505658	CCDC57	Positive
cg10532980	MAD1L1;MAD1L1;MAD1L1	Positive
cg10534359		Positive
cg10545250	MFGE8;MFGE8	Negative
cg10548038	GPC5	Positive
cg10564791	STK10	Negative
cg10569694	RNF216L;RNF216L;RNF216L	Positive
cg10729426	ZNF549	Positive
cg10745988	ZFYVE21	Positive
cg10774647	MAD1L1;MAD1L1;MAD1L1	Positive
cg10784519		Negative
cg10789314		Negative
cg10804687		Negative
cg10824677		Negative
cg10917910	FGD6	Positive
cg10929582		Negative
cg10981580	GPR137B	Negative
cg11064738	RAD51L1	Negative
cg11071401	CACNA1G;CACNA1G;CACNA1G;CACNA1G;CACNA1G;CACNA1G;CACNA1G;CACNA1G;CACNA1G;CACNA1G;CACNA1G;CACNA1G;CACNA1G;CACNA1G;CACNA1G	Positive
cg11082362	INSM2	Positive
cg11149849	ABR;ABR	Positive
cg11177223	C7orf20	Positive
cg11230435	MAP3K8	Negative
cg11267480	SRRM3	Positive
cg11337915	HMGN1	Negative
cg11342615	TIMP2	Negative
cg11344073	EIF2AK2;EIF2AK2;EIF2AK2	Negative
cg11383802	DHCR7;DHCR7	Positive
cg11385003	PDXK	Negative
cg11403598	NIP7;COG8	Negative
cg11435167	MBD3	Positive
cg11463380	RGS12;RGS12;RGS12	Negative
cg11464885		Negative
cg11526073	C1orf70	Positive
cg11553687		Positive
cg11599721	RPS6KA2;RPS6KA2	Positive
cg11615607		Negative
cg11654118	TNNT3;TNNT3;TNNT3;TNNT3	Positive
cg11788425	HRNBP3	Positive
cg11789371	HSP90AA1;HSP90AA1	Positive
cg11811840	UGT1A10;UGT1A1;UGT1A6;UGT1A8;UGT1A4;UGT1A3;UGT1A6;UGT1A9;UGT1A7;UGT1A5	Positive
cg11817411	AGAP3;AGAP3	Positive
cg11818438		Positive
cg11888359	UHRF1;UHRF1	Positive
cg11904435		Positive
cg11923914		Negative
cg11933290		Positive
cg11956467	SORBS2	Negative
cg11965881	SH3PXD2B	Positive
cg12002710		Negative
cg12019475		Negative
cg12026891		Positive
cg12032049	LPO;LPO;LPO	Negative
cg12063018	RIN3	Positive
cg12076692	GNB1	Negative
cg12100751	C1orf59;C1orf59;C1orf59	Positive
cg12153480	EIF4A2	Negative
cg12165943		Positive
cg12231584	LRRC47	Negative
cg12262181	TCF7L2;TCF7L2;TCF7L2;TCF7L2;TCF7L2;TCF7L2	Negative
cg12309348	C17orf102	Negative
cg12373771	CECR6;CECR6	Positive
cg12428326	ZHX3	Negative
cg12451155	YTHDF2	Positive
cg12514868	RNF4	Positive
cg12575511	MAD1L1;MAD1L1;MAD1L1	Positive
cg12589298	KCNC3	Positive
cg12678507	MAD1L1;MAD1L1;MAD1L1	Positive
cg12678562	GPC5	Positive
cg12731325	DNAH2	Positive
cg12763813	FGFR2;FGFR2;FGFR2;FGFR2;FGFR2;FGFR2;FGFR2;FGFR2;FGFR2	Negative
cg12807206	GPD2;GPD2	Positive
cg12807237		Negative
cg12813724	ZNF683;ZNF683	Positive
cg12864581	NKAIN1	Negative
cg12926839	CHPF2	Positive
cg12977135	EXT1	Positive
cg12981876	GIGYF1	Positive
cg12983839	SPPL2B;SPPL2B	Positive
cg13007207	ATXN7L1;ATXN7L1	Negative
cg13043300	DHCR7;DHCR7	Negative
cg13096351	CTTN;CTTN	Negative
cg13201172	SCRIB;SCRIB	Positive
cg13224583	PEAR1	Negative
cg13231680	GRM7;GRM7	Positive
cg13261106		Negative
cg13300521		Positive
cg13340085	ANKMY1;ANKMY1	Positive
cg13389146		Negative
cg13449372	C10orf2;MRPL43;MRPL43;MRPL43;C10orf2;C10orf2;C10orf2;MRPL43	Positive
cg13460409	DSCR6	Positive
cg13472359		Positive
cg13518625		Negative
cg13569761	LRRC47	Positive
cg13599835	ATP11A;ATP11A	Positive
cg13649056		Positive
cg13753460	MIR134;MIR668;MIR485	Negative
cg13771219	NTN5;SEC1	Positive
cg13783238	SMC4;MIR15B;SMC4;MIR16-2	Positive
cg13801740	PNPLA7;PNPLA7	Negative
cg13803765	ABL1;ABL1	Positive
cg13816999	PARVA	Positive
cg13818276	SLC5A1	Negative
cg13826105		Negative
cg13833040	ATP2A2;ATP2A2;ATP2A2	Positive
cg13845105	RPL6;RPL6	Negative
cg13854930		Positive
cg13893358	ABLIM2;ABLIM2;ABLIM2;ABLIM2;ABLIM2;ABLIM2;ABLIM2	Positive
cg13935689		Positive
cg13943358	TP73	Positive
cg13970540	RPL18AP3;SNORA68;RPL18A	Negative
cg13983181	PRDM16;PRDM16	Positive
cg14003611	EVC2;EVC2	Negative
cg14006649	KRT40	Positive
cg14023774	B3GALT4	Negative
cg14044216	JAKMIP3	Positive
cg14111380	GABBR1;GABBR1;GABBR1	Negative
cg14184729	AKT1;AKT1;AKT1	Positive
cg14237301	APOB48R	Negative
cg14255824	TJP2;TJP2;TJP2;TJP2	Negative
cg14279035	FAM69B	Negative
cg14284211	FKBP5;FKBP5;FKBP5;FKBP5	Negative
cg14288335		Positive
cg14364926	ZER1	Negative
cg14375747	FBXL14	Positive
cg14386870	SNORA10;SNORA64;RPS2	Positive
cg14431361		Negative
cg14434062		Negative
cg14447810	FIBCD1;FIBCD1	Negative
cg14505299	COBL	Negative
cg14514991	OR6N1	Positive
cg14544225		Positive
cg14555736	TMEM132C	Positive
cg14578500	PLCD3	Negative
cg14590214	LRRK1	Negative
cg14614689	TCERG1L	Positive
cg14633456		Positive
cg14674720		Positive
cg14676592		Positive
cg14737704	PLXNB2	Positive
cg14756040	BTBD2	Positive
cg14819229	RGMA;RGMA;RGMA;RGMA;RGMA;RGMA	Positive
cg14848772	HIST1H2AG	Positive
cg14871225	CXXC5	Negative
cg14911690	PBX4	Positive
cg14981819		Negative
cg15028232		Positive
cg15048099	C10orf93	Negative
cg15086820	KCNJ14;KCNJ14	Negative
cg15101483	ANO8	Negative
cg15103195	AP1S1	Positive
cg15115984		Positive
cg15288779	RGMA;RGMA;RGMA;RGMA;RGMA;RGMA	Positive
cg15345907	SORBS2;SORBS2;SORBS2;SORBS2;SORBS2;SORBS2	Negative
cg15422307	KCNQ1;KCNQ1OT1;KCNQ1	Positive
cg15471073	FAM184B	Negative
cg15557144	EMILIN3;LPIN3	Positive
cg15561453	SCAP	Positive
cg15563355	SERF2;MIR1282	Positive
cg15571405	MKLN1	Negative
cg15619794	IL5	Positive
cg15623062	VARS	Positive
cg15733049	RER1	Negative
cg15777261	CCT7;CCT7;CCT7;CCT7;CCT7;CCT7	Negative
cg15857635	MICALL2	Negative
cg15936446		Positive
cg15970457	CTBP2;CTBP2	Positive
cg15998686	FOXK2	Positive
cg16002887	PRDM16;PRDM16	Negative
cg16022049	EMP1	Negative
cg16058485	CLIP2;CLIP2	Negative
cg16139785	RCOR1	Positive
cg16143325		Negative
cg16164923	CCDC150	Negative
cg16262215	NDUFA7;KANK3	Negative
cg16373176	RAI1	Negative
cg16446346	RASA3	Positive
cg16489193	VPS52;RPS18	Positive
cg16490191	UNKL	Negative
cg16530128	SLC22A18;SLC22A18;SLC22A18AS	Positive
cg16541852		Positive
cg16549027	CUL9	Negative
cg16552881	APBB2;APBB2;APBB2;APBB2;APBB2;APBB2;APBB2	Negative
cg16559361	ZFPM1	Positive
cg16580935	B3GALT4	Positive
cg16626322		Positive
cg16668397	JPH3	Negative
cg16760712	DTYMK;DTYMK;DTYMK	Positive
cg16839815	XIRP1	Negative
cg16867657	ELOVL2	Positive
cg16894138	TKT;TKT;TKT	Negative
cg16909962	RAB4A	Positive
cg17022393		Negative
cg17080740	S100A1;S100A13;S100A13	Negative
cg17110586		Positive
cg17112707	CCBE1	Negative
cg17120578		Positive
cg17152322		Positive
cg17180088	WSCD2	Negative
cg17233806		Negative
cg17240133	GCOM1;GCOM1;GCOM1;GCOM1	Positive
cg17243289	SMAD2;SMAD2;SMAD2	Positive
cg17265115	PCGF3	Negative
cg17284536	RPS6KA2;RPS6KA2	Positive
cg17291767	TRERF1	Positive
cg17352276	SNORD16;RPL4;SNORD18B	Positive
cg17425351		Positive
cg17486066	HMGB4;CSMD2;HMGB4	Positive
cg17490283	NPHP4	Negative
cg17554182		Negative
cg17566735	PLD1;PLD1	Negative
cg17802216	SMOC2;SMOC2	Positive
cg17825770	TRPS1	Positive
cg17864650	TPD52L1;TPD52L1;TPD52L1;TPD52L1	Negative
cg17935811	DHRS3	Negative
cg17954142	GALNT2	Positive
cg18086520	SORBS2	Negative
cg18159646	SNORD22;SNORD31;SNORD30;SNHG1	Positive
cg18234606	THBS1	Negative
cg18276125	C10orf2;C10orf2;C10orf2;C10orf2	Negative
cg18366882		Positive
cg18404335	RPS6KA2;RPS6KA2	Positive
cg18424850	TCERG1L	Positive
cg18468088		Positive
cg18493314	CHD8;CHD8	Negative
cg18536827	ELMO1	Positive
cg18569335	NKIRAS2;NKIRAS2;NKIRAS2;NKIRAS2;NKIRAS2	Positive
cg18625289	MBD3	Negative
cg18662080	FLT1;FLT1;FLT1;FLT1	Negative
cg18671115	COL11A2;COL11A2;COL11A2	Positive
cg18725544	PRRT4	Negative
cg18729787	B3GALT4	Negative
cg18738985	KCNMA1;KCNMA1;KCNMA1;KCNMA1	Negative
cg18749411	ATP10A	Negative
cg18784113	THRB;THRB;THRB	Negative
cg18825531		Negative
cg18831134	ABR	Positive
cg18845578	HDAC4	Negative
cg18861551	RIMBP2	Positive
cg18982384	FBLN5	Positive
cg19047670	CCND1	Positive
cg19060970	ZNF549	Positive
cg19094872	PASK	Positive
cg19122460	SLC38A3	Positive
cg19273773	NAPEPLD;NAPEPLD	Positive
cg19291355	AARS2	Positive
cg19343530		Positive
cg19410796		Positive
cg19516374	PNKD;PNKD	Negative
cg19701014	BAT2	Positive
cg19736226	GOLGA3	Negative
cg19742341	SHANK2;SHANK2	Positive
cg19744398		Positive
cg19746343	TOMM20	Positive
cg19795722	NTM;NTM;NTM;NTM	Positive
cg19832832		Negative
cg19851222		Negative
cg19864002		Positive
cg19908207	GFRA3	Positive
cg19937878		Negative
cg19996418	RECQL4	Negative
cg20005760	EIF3J	Positive
cg20017995	SNORD24;SNORD36B;MED22;RPL7A;MED22;SNORD36A	Positive
cg20025677	HSP90AB1	Negative
cg20063640	NOP56;NOP56;SNORA51	Positive
cg20078454	GPR20	Positive
cg20080282	CUL5	Positive
cg20119148	PDE4C	Positive
cg20143092	CD44;CD44;CD44;CD44;CD44	Negative
cg20167471	ARHGEF19	Negative
cg20226327	KEAP1;KEAP1	Positive
cg20308403	MAD1L1;MAD1L1;MAD1L1	Negative
cg20308540	PLD5	Positive
cg20312457	AFAP1;AFAP1	Positive
cg20382028	MCM3AP	Negative
cg20436707	DIP2C;C10orf108;C10orf108	Positive
cg20490900	SSU72	Negative
cg20518446	AHNAK;AHNAK	Negative
cg20543092	CSRNP1	Positive
cg20544516	MIR33B;SREBF1;SREBF1	Negative
cg20599086	EVC2;EVC2	Negative
cg20663495	B3GNTL1	Negative
cg20666186		Positive
cg20689661	MAD1L1;MAD1L1;MAD1L1	Negative
cg20706495		Negative
cg20732137	GMEB2	Negative
cg20837354	CACNA1C;CACNA1C;CACNA1C;CACNA1C;CACNA1C;CACNA1C;CACNA1C;CACNA1C;CACNA1C;CACNA1C;CACNA1C;CACNA1C;CACNA1C;CACNA1C;CACNA1C;CACNA1C;CACNA1C;CACNA1C;CACNA1C;CACNA1C;CACNA1C;CACNA1C;CACNA1C	Negative
cg20852557	EIF4G1;EIF4G1;EIF4G1;EIF4G1	Negative
cg20897936	SCAND3;SCAND3	Positive
cg20898773		Positive
cg20940044	VEGFA;VEGFA;VEGFA;VEGFA;VEGFA;VEGFA;VEGFA;VEGFA;VEGFA;VEGFA;VEGFA;VEGFA;VEGFA;VEGFA;VEGFA;VEGFA	Positive
cg20941823		Negative
cg20953047	PIGR	Negative
cg20978460	IQCE;IQCE	Positive
cg21038418	PARD3B;PARD3B;PARD3B	Positive
cg21089789	WDR20	Negative
cg21105175	RANBP3;RANBP3;RANBP3	Positive
cg21150839		Positive
cg21186299	VGF;VGF	Positive
cg21196551		Positive
cg21230565	SH3PXD2B	Positive
cg21293117	C17orf77;CD300LD	Positive
cg21355793	COBL	Positive
cg21399778	PASK	Negative
cg21442182		Positive
cg21520772		Negative
cg21537049		Negative
cg21572722	ELOVL2	Positive
cg21622381		Negative
cg21623865	CPNE9	Positive
cg21632014	PSG11;PSG11;PSG11	Positive
cg21700723	RIOK1	Positive
cg21727223		Negative
cg21787249	XIRP1	Negative
cg21805880	GGT6;GGT6	Positive
cg21834048	GRK7	Positive
cg21855910	CDK5R1	Positive
cg22016859	FAM116B	Positive
cg22029284	PRDM16;PRDM16	Negative
cg22108374	CCDC33	Positive
cg22212250	AFF4	Positive
cg22245862	TMEM175	Positive
cg22273939	LOC284798;LOC284798;LOC284798	Negative
cg22322679	B3GALT4;RPS18	Positive
cg22329027		Negative
cg22331349	ZNF577;ZNF577;ZNF577	Positive
cg22340475	RP1	Negative
cg22376805	PROX1	Positive
cg22454769	FHL2;FHL2;FHL2;FHL2	Positive
cg22599122	HMGB4;CSMD2;HMGB4;HMGB4	Positive
cg22622425	FASN	Negative
cg22629266	ARHGEF11;MIR765;ARHGEF11	Positive
cg22654656		Negative
cg22658311	VEGFC	Negative
cg22736354	NHLRC1	Positive
cg22796923	PRDM16;PRDM16	Positive
cg22836769		Positive
cg22838685		Positive
cg22876153		Positive
cg22909935	SPOCK1	Positive
cg22912214	CYHR1	Positive
cg22930390	C19orf22	Positive
cg22931466	TSNARE1	Positive
cg22964621	MDGA2	Positive
cg23022057	PRDM16;PRDM16	Positive
cg23104816	ABCF1;ABCF1;MIR877	Negative
cg23193410	LOC100268168;LOC100268168;RPL26L1	Positive
cg23193759	C10orf35	Positive
cg23239690	MGMT	Negative
cg23240477	NFATC1;NFATC1;NFATC1;NFATC1	Negative
cg23259527	CLSTN1;CLSTN1	Negative
cg23264016	C10orf11	Negative
cg23275972		Positive
cg23314364		Negative
cg23344241	SPTBN2	Positive
cg23367683	TRIM7;TRIM7;TRIM7;TRIM7;TRIM7	Negative
cg23386779	COL13A1;COL13A1;COL13A1;COL13A1;COL13A1;COL13A1;COL13A1;COL13A1;COL13A1;COL13A1;COL13A1;COL13A1;COL13A1;COL13A1;COL13A1;COL13A1;COL13A1;COL13A1;COL13A1;COL13A1	Positive
cg23423191	STK10	Positive
cg23436042		Negative
cg23479065	LRRN1	Negative
cg23500537		Positive
cg23507761	CANT1;CANT1;CANT1	Negative
cg23532985	TRIM68	Negative
cg23558337	C20orf94	Negative
cg23575858		Positive
cg23586440	C20orf112	Negative
cg23606718	FAM123C;FAM123C;FAM123C;FAM123C;FAM123C;FAM123C	Positive
cg23674189	PRR22;DUS3L;DUS3L;PRR22	Positive
cg23796243	SUV420H1;SUV420H1	Positive
cg23800169		Positive
cg23854009	ZNF530	Positive
cg23855818	SLC41A2	Negative
cg23907852	LOC100128977;IMP5	Negative
cg23995914	ZNF518B	Positive
cg23998119	ZDHHC22	Positive
cg23999833		Negative
cg24027320	TASP1	Positive
cg24027742	SYVN1;SYVN1	Negative
cg24105287		Negative
cg24137448	SNX11;SNX11	Positive
cg24170085	SH3BP5;SH3BP5	Negative
cg24204847	EEF2	Negative
cg24314434	FUT3;FUT3;FUT3;FUT3	Negative
cg24315421		Negative
cg24315710	COL29A1;COL29A1	Positive
cg24358467	AFAP1;AFAP1	Positive
cg24406771		Positive
cg24459227		Positive
cg24510397		Positive
cg24570912	MANBAL;MANBAL	Negative
cg24585690	IL9;IL9	Positive
cg24607283	HRH1;HRH1;HRH1;HRH1	Negative
cg24616382	GAL3ST4	Positive
cg24701662	TRIM26	Negative
cg24723690		Negative
cg24888989	KIF15;KIF15;KIAA1143	Positive
cg24895178	HS3ST3B1;MGC12916	Negative
cg25090514		Positive
cg25178784	C11orf2	Positive
cg25188724		Negative
cg25202261	SNX27	Positive
cg25245569	C2orf61;C2orf61	Positive
cg25264630	PTPRN2;PTPRN2;PTPRN2	Negative
cg25284213	MIR206	Positive
cg25319233	TMCO6	Negative
cg25323057	C10orf116;AGAP11	Negative
cg25410668	RPA2	Positive
cg25427880		Positive
cg25467652	AGTRAP;AGTRAP;AGTRAP;AGTRAP;AGTRAP	Negative
cg25478614	SST	Positive
cg25575532		Negative
cg25580076	C10orf2;MRPL43;MRPL43;MRPL43;C10orf2;C10orf2;C10orf2;MRPL43	Positive
cg25590826	CCDC33	Negative
cg25634000	TOP1MT	Negative
cg25636481	RPS18	Negative
cg25690537	VSTM2B	Positive
cg25744613	ZBTB16;ZBTB16	Negative
cg25865120	DUT;DUT;DUT	Negative
cg25876227	GRHL2	Positive
cg25966649	CACNA2D4	Positive
cg26028489		Positive
cg26066433	PPP1R13B	Negative
cg26140475		Negative
cg26182780	AGAP1;AGAP1	Negative
cg26195652	TIE1	Negative
cg26268968	SOAT2	Positive
cg26279371	LOC145814;LOC145814	Negative
cg26283098	GAS7	Negative
cg26307701		Positive
cg26318502		Positive
cg26328951	SNHG12;SNORD99;SNORA61	Positive
cg26330304	ZNF710	Negative
cg26427827	CASZ1;CASZ1	Positive
cg26518431	MGC12982;FOXD2	Negative
cg26522319	C1orf103;C1orf103;C1orf103;C1orf103	Positive
cg26546113	DHX9	Positive
cg26548187	NCLN	Positive
cg26568075	GNB1	Negative
cg26605700	KCTD5	Negative
cg26627327	HDAC4	Positive
cg26638341	ATP8B3	Negative
cg26652413	CPAMD8	Negative
cg26711406		Negative
cg26734668	ZNF530	Positive
cg26776924	CSNK1G2	Negative
cg26792755	MRPS33;MRPS33	Positive
cg26830108		Positive
cg26856080	TRIM59	Positive
cg26866474		Positive
cg26875852		Positive
cg26884787	ZFPM1	Positive
cg26913669	COL11A1;COL11A1;COL11A1;COL11A1	Negative
cg26921969		Positive
cg26933107	NR4A1;NR4A1	Negative
cg27011829	BRWD1	Positive
cg27011829	BRWD1	Negative
cg27039821	MIR665	Positive
cg27052183	RBM4	Negative
cg27179571	KRBA1	Negative
cg27181375		Negative
cg27224971		Positive
cg27320127	KCNK12	Positive
cg27338302	CACNA1H;CACNA1H	Positive
cg27391127	TRIM8	Negative
cg27426151	LRP5	Positive
cg27451587	SEC16B	Negative
cg27541691	TUBG2	Positive
cg27545630	SNORA64;SNORA10;RPS2	Negative
cg27658391	TMCO6	Negative
cg27665659	AP1S1	Positive

[truncated: 1 more sheets: Supplementary Table 10]
